# Supplementary material for: Construction and validation of an RNA-binding protein-associated prognostic model for colorectal cancer
Source: PeerJ journal article supplement (doi:10.7717/peerj.11219), 2021-04-05

|          | <b>pvalue</b> | <b>Hazard ratio</b> |
|----------|---------------|---------------------|
| ZC3H12C  | 0.020         | 0.807(0.674–0.967)  |
| PNLDC1   | 0.031         | 1.227(1.019–1.476)  |
| LUZP4    | <0.001        | 1.531(1.246–1.882)  |
| RRS1     | 0.011         | 1.484(1.095–2.011)  |
| HEXIM1   | 0.038         | 1.371(1.018–1.847)  |
| SRRM3    | 0.037         | 1.659(1.031–2.671)  |
| PPARGC1A | 0.046         | 0.809(0.657–0.996)  |
| PPARGC1B | 0.006         | 0.594(0.410–0.862)  |
| RBPM52   | 0.040         | 1.310(1.013–1.695)  |
| BRCA1    | 0.028         | 0.653(0.447–0.955)  |
| CELF4    | <0.001        | 1.676(1.265–2.220)  |
| AEN      | 0.023         | 1.351(1.043–1.752)  |
| LRRFIP2  | 0.043         | 0.707(0.506–0.989)  |
| EIF4E3   | 0.033         | 0.675(0.471–0.969)  |
| NOVA1    | 0.002         | 1.327(1.108–1.589)  |

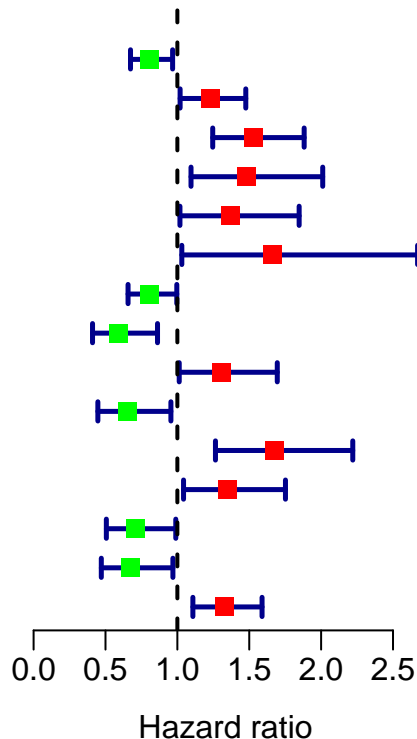

Supplement: raw_data.zip [file raw_data.zip]
