# Supplementary material for: Construction and validation of an RNA-binding protein-associated prognostic model for colorectal cancer
Source: PeerJ. 2021 Apr 5;9:e11219. doi: 10.7717/peerj.11219 (PMC8029696; doi:10.7717/peerj.11219)
Supplement: Supplemental Information 3 [file peerj-09-11219-s003.xlsx]

## Sheet: upregulated in phenotype h
Table S3. The detailed information of GSEA analysis
NAME	GS<br> follow link to MSigDB	SIZE	ES	NES	NOM p-val	FDR q-val	FWER p-val	RANK AT MAX	LEADING EDGE
KEGG_BASAL_CELL_CARCINOMA	KEGG_BASAL_CELL_CARCINOMA	55	0.605136	2.14646	0	0.0235417	0.023	7088	tags=56%, list=13%, signal=65%
KEGG_DILATED_CARDIOMYOPATHY	KEGG_DILATED_CARDIOMYOPATHY	90	0.605654	2.11184	0	0.0164495	0.033	7529	tags=60%, list=14%, signal=69%
KEGG_GLYCOSAMINOGLYCAN_BIOSYNTHESIS_CHONDROITIN_SULFATE	KEGG_GLYCOSAMINOGLYCAN_BIOSYNTHESIS_CHONDROITIN_SULFATE	22	0.771268	2.07938	0	0.0158765	0.038	4133	tags=59%, list=7%, signal=64%
KEGG_COMPLEMENT_AND_COAGULATION_CASCADES	KEGG_COMPLEMENT_AND_COAGULATION_CASCADES	69	0.621112	2.05578	0.00190476	0.0170807	0.051	5201	tags=51%, list=9%, signal=56%
KEGG_HYPERTROPHIC_CARDIOMYOPATHY_HCM	KEGG_HYPERTROPHIC_CARDIOMYOPATHY_HCM	83	0.549743	1.91006	0.00195312	0.0572729	0.167	7529	tags=55%, list=14%, signal=64%
KEGG_ARRHYTHMOGENIC_RIGHT_VENTRICULAR_CARDIOMYOPATHY_ARVC	KEGG_ARRHYTHMOGENIC_RIGHT_VENTRICULAR_CARDIOMYOPATHY_ARVC	74	0.545495	1.8544	0.008	0.0812407	0.236	7529	tags=57%, list=14%, signal=66%
KEGG_HEDGEHOG_SIGNALING_PATHWAY	KEGG_HEDGEHOG_SIGNALING_PATHWAY	56	0.515315	1.79946	0.0116279	0.106621	0.302	6242	tags=48%, list=11%, signal=54%
KEGG_VASCULAR_SMOOTH_MUSCLE_CONTRACTION	KEGG_VASCULAR_SMOOTH_MUSCLE_CONTRACTION	115	0.466586	1.77695	0.00397614	0.108742	0.338	4468	tags=36%, list=8%, signal=39%
KEGG_NEUROACTIVE_LIGAND_RECEPTOR_INTERACTION	KEGG_NEUROACTIVE_LIGAND_RECEPTOR_INTERACTION	271	0.473641	1.7221	0.00606061	0.137953	0.439	8227	tags=40%, list=15%, signal=47%
KEGG_MELANOGENESIS	KEGG_MELANOGENESIS	101	0.417402	1.64813	0.0216535	0.193431	0.542	7362	tags=41%, list=13%, signal=47%
KEGG_CALCIUM_SIGNALING_PATHWAY	KEGG_CALCIUM_SIGNALING_PATHWAY	177	0.409821	1.63754	0.0173745	0.18667	0.556	6332	tags=37%, list=11%, signal=41%
KEGG_TYROSINE_METABOLISM	KEGG_TYROSINE_METABOLISM	42	0.481241	1.63482	0.0313725	0.173185	0.557	6409	tags=45%, list=12%, signal=51%
KEGG_ARACHIDONIC_ACID_METABOLISM	KEGG_ARACHIDONIC_ACID_METABOLISM	58	0.432623	1.62868	0.00998004	0.164261	0.566	7031	tags=28%, list=13%, signal=32%
KEGG_ECM_RECEPTOR_INTERACTION	KEGG_ECM_RECEPTOR_INTERACTION	84	0.5581	1.61743	0.0718447	0.162412	0.588	7462	tags=57%, list=14%, signal=66%
KEGG_AXON_GUIDANCE	KEGG_AXON_GUIDANCE	129	0.424903	1.60202	0.0428016	0.165352	0.621	7895	tags=47%, list=14%, signal=55%
KEGG_CELL_ADHESION_MOLECULES_CAMS	KEGG_CELL_ADHESION_MOLECULES_CAMS	131	0.49183	1.56033	0.0914513	0.195308	0.69	7687	tags=46%, list=14%, signal=53%
KEGG_CARDIAC_MUSCLE_CONTRACTION	KEGG_CARDIAC_MUSCLE_CONTRACTION	78	0.431462	1.50585	0.0643275	0.239748	0.751	6866	tags=38%, list=12%, signal=44%
KEGG_PRION_DISEASES	KEGG_PRION_DISEASES	35	0.464905	1.50507	0.0714286	0.227477	0.752	10869	tags=51%, list=20%, signal=64%
KEGG_MAPK_SIGNALING_PATHWAY	KEGG_MAPK_SIGNALING_PATHWAY	267	0.346226	1.46385	0.056926	0.261485	0.799	6866	tags=38%, list=12%, signal=43%
KEGG_BLADDER_CANCER	KEGG_BLADDER_CANCER	42	0.39844	1.46335	0.0753296	0.248924	0.799	3842	tags=36%, list=7%, signal=38%
KEGG_FOCAL_ADHESION	KEGG_FOCAL_ADHESION	199	0.418052	1.46328	0.110039	0.237125	0.799	7858	tags=47%, list=14%, signal=54%
KEGG_GLYCOSAMINOGLYCAN_BIOSYNTHESIS_HEPARAN_SULFATE	KEGG_GLYCOSAMINOGLYCAN_BIOSYNTHESIS_HEPARAN_SULFATE	26	0.458877	1.45661	0.0834952	0.233114	0.809	7624	tags=46%, list=14%, signal=54%
KEGG_GAP_JUNCTION	KEGG_GAP_JUNCTION	90	0.38396	1.43576	0.0798403	0.244929	0.834	6502	tags=34%, list=12%, signal=39%
KEGG_NOTCH_SIGNALING_PATHWAY	KEGG_NOTCH_SIGNALING_PATHWAY	47	0.427174	1.43122	0.110476	0.24002	0.84	6188	tags=45%, list=11%, signal=50%
KEGG_WNT_SIGNALING_PATHWAY	KEGG_WNT_SIGNALING_PATHWAY	150	0.337259	1.40826	0.0833333	0.255418	0.856	5363	tags=35%, list=10%, signal=38%
KEGG_VEGF_SIGNALING_PATHWAY	KEGG_VEGF_SIGNALING_PATHWAY	76	0.356237	1.40159	0.0986193	0.253385	0.863	4250	tags=28%, list=8%, signal=30%
KEGG_LEUKOCYTE_TRANSENDOTHELIAL_MIGRATION	KEGG_LEUKOCYTE_TRANSENDOTHELIAL_MIGRATION	116	0.391579	1.40082	0.134694	0.2448	0.864	7846	tags=40%, list=14%, signal=46%
KEGG_MELANOMA	KEGG_MELANOMA	71	0.375302	1.39005	0.114341	0.247454	0.876	6779	tags=39%, list=12%, signal=45%
KEGG_CYTOKINE_CYTOKINE_RECEPTOR_INTERACTION	KEGG_CYTOKINE_CYTOKINE_RECEPTOR_INTERACTION	264	0.381656	1.38804	0.167653	0.240927	0.88	10303	tags=39%, list=19%, signal=48%
KEGG_ASTHMA	KEGG_ASTHMA	28	0.545214	1.37894	0.190763	0.241712	0.885	13199	tags=64%, list=24%, signal=84%
KEGG_RIBOSOME	KEGG_RIBOSOME	87	0.60516	1.37424	0.221569	0.239019	0.89	8287	tags=51%, list=15%, signal=59%
KEGG_TGF_BETA_SIGNALING_PATHWAY	KEGG_TGF_BETA_SIGNALING_PATHWAY	85	0.36164	1.37312	0.127907	0.232688	0.891	5045	tags=35%, list=9%, signal=39%
KEGG_MATURITY_ONSET_DIABETES_OF_THE_YOUNG	KEGG_MATURITY_ONSET_DIABETES_OF_THE_YOUNG	25	0.472341	1.36759	0.1423	0.231937	0.897	6999	tags=44%, list=13%, signal=50%
KEGG_TIGHT_JUNCTION	KEGG_TIGHT_JUNCTION	132	0.32155	1.36066	0.0858896	0.231381	0.905	6970	tags=36%, list=13%, signal=42%
KEGG_PATHWAYS_IN_CANCER	KEGG_PATHWAYS_IN_CANCER	325	0.32758	1.35572	0.134503	0.229209	0.906	7088	tags=38%, list=13%, signal=43%
KEGG_PATHOGENIC_ESCHERICHIA_COLI_INFECTION	KEGG_PATHOGENIC_ESCHERICHIA_COLI_INFECTION	56	0.390483	1.34752	0.136546	0.230529	0.912	2755	tags=23%, list=5%, signal=24%
KEGG_GLYCOSAMINOGLYCAN_DEGRADATION	KEGG_GLYCOSAMINOGLYCAN_DEGRADATION	21	0.477244	1.34658	0.151093	0.224947	0.913	2849	tags=33%, list=5%, signal=35%
KEGG_REGULATION_OF_ACTIN_CYTOSKELETON	KEGG_REGULATION_OF_ACTIN_CYTOSKELETON	213	0.337819	1.33123	0.1423	0.234697	0.923	6346	tags=36%, list=11%, signal=40%
KEGG_GLUTATHIONE_METABOLISM	KEGG_GLUTATHIONE_METABOLISM	49	0.396203	1.30268	0.161355	0.255575	0.949	4272	tags=27%, list=8%, signal=29%
KEGG_LONG_TERM_DEPRESSION	KEGG_LONG_TERM_DEPRESSION	70	0.330289	1.27496	0.175676	0.277064	0.965	4468	tags=24%, list=8%, signal=26%
KEGG_AMYOTROPHIC_LATERAL_SCLEROSIS_ALS	KEGG_AMYOTROPHIC_LATERAL_SCLEROSIS_ALS	53	0.329518	1.23679	0.185404	0.310074	0.977	5305	tags=34%, list=10%, signal=38%
KEGG_VIBRIO_CHOLERAE_INFECTION	KEGG_VIBRIO_CHOLERAE_INFECTION	54	0.323457	1.21627	0.200409	0.325526	0.982	2731	tags=20%, list=5%, signal=21%
KEGG_VIRAL_MYOCARDITIS	KEGG_VIRAL_MYOCARDITIS	68	0.377631	1.20959	0.263056	0.325918	0.985	9113	tags=46%, list=16%, signal=55%
KEGG_GRAFT_VERSUS_HOST_DISEASE	KEGG_GRAFT_VERSUS_HOST_DISEASE	37	0.50404	1.20639	0.328032	0.322053	0.985	13199	tags=54%, list=24%, signal=71%
KEGG_GLYCINE_SERINE_AND_THREONINE_METABOLISM	KEGG_GLYCINE_SERINE_AND_THREONINE_METABOLISM	31	0.374866	1.19921	0.223553	0.323431	0.987	5629	tags=29%, list=10%, signal=32%
KEGG_ARGININE_AND_PROLINE_METABOLISM	KEGG_ARGININE_AND_PROLINE_METABOLISM	54	0.346627	1.19542	0.2393	0.320523	0.987	6277	tags=33%, list=11%, signal=38%
KEGG_LYSOSOME	KEGG_LYSOSOME	121	0.336636	1.17216	0.29771	0.339381	0.992	5473	tags=34%, list=10%, signal=38%
KEGG_RNA_POLYMERASE	KEGG_RNA_POLYMERASE	29	0.396879	1.16394	0.297189	0.340971	0.993	3338	tags=24%, list=6%, signal=26%
KEGG_ACUTE_MYELOID_LEUKEMIA	KEGG_ACUTE_MYELOID_LEUKEMIA	57	0.327623	1.15765	0.299197	0.340927	0.993	4304	tags=32%, list=8%, signal=34%
KEGG_AUTOIMMUNE_THYROID_DISEASE	KEGG_AUTOIMMUNE_THYROID_DISEASE	50	0.393999	1.15128	0.322134	0.341116	0.993	13209	tags=48%, list=24%, signal=63%
KEGG_LEISHMANIA_INFECTION	KEGG_LEISHMANIA_INFECTION	70	0.3877	1.15016	0.341223	0.335698	0.993	6957	tags=37%, list=13%, signal=42%
KEGG_EPITHELIAL_CELL_SIGNALING_IN_HELICOBACTER_PYLORI_INFECTION	KEGG_EPITHELIAL_CELL_SIGNALING_IN_HELICOBACTER_PYLORI_INFECTION	68	0.310634	1.14825	0.288201	0.331407	0.993	5206	tags=31%, list=9%, signal=34%
KEGG_GLIOMA	KEGG_GLIOMA	65	0.304601	1.14449	0.258893	0.328917	0.993	4568	tags=31%, list=8%, signal=34%
KEGG_STEROID_HORMONE_BIOSYNTHESIS	KEGG_STEROID_HORMONE_BIOSYNTHESIS	55	0.293249	1.07353	0.349896	0.401209	0.999	8395	tags=24%, list=15%, signal=28%
KEGG_HEMATOPOIETIC_CELL_LINEAGE	KEGG_HEMATOPOIETIC_CELL_LINEAGE	85	0.358403	1.07252	0.391129	0.395005	0.999	10333	tags=39%, list=19%, signal=48%
KEGG_CHEMOKINE_SIGNALING_PATHWAY	KEGG_CHEMOKINE_SIGNALING_PATHWAY	188	0.292351	1.05684	0.39596	0.406673	0.999	7876	tags=33%, list=14%, signal=38%
KEGG_TYPE_I_DIABETES_MELLITUS	KEGG_TYPE_I_DIABETES_MELLITUS	41	0.400339	1.04705	0.421371	0.411225	0.999	13199	tags=54%, list=24%, signal=70%
KEGG_ALLOGRAFT_REJECTION	KEGG_ALLOGRAFT_REJECTION	35	0.435702	1.02869	0.469758	0.426008	0.999	13199	tags=54%, list=24%, signal=71%
KEGG_INTESTINAL_IMMUNE_NETWORK_FOR_IGA_PRODUCTION	KEGG_INTESTINAL_IMMUNE_NETWORK_FOR_IGA_PRODUCTION	46	0.373308	0.991772	0.48996	0.462877	1	8851	tags=37%, list=16%, signal=44%
KEGG_METABOLISM_OF_XENOBIOTICS_BY_CYTOCHROME_P450	KEGG_METABOLISM_OF_XENOBIOTICS_BY_CYTOCHROME_P450	69	0.27467	0.98785	0.436853	0.460034	1	12434	tags=33%, list=22%, signal=43%
KEGG_GALACTOSE_METABOLISM	KEGG_GALACTOSE_METABOLISM	26	0.312013	0.96656	0.499002	0.479161	1	3655	tags=27%, list=7%, signal=29%
KEGG_GLYCOLYSIS_GLUCONEOGENESIS	KEGG_GLYCOLYSIS_GLUCONEOGENESIS	62	0.271577	0.902034	0.542339	0.55637	1	7074	tags=31%, list=13%, signal=35%
KEGG_DRUG_METABOLISM_CYTOCHROME_P450	KEGG_DRUG_METABOLISM_CYTOCHROME_P450	71	0.236162	0.856842	0.646443	0.611351	1	4185	tags=14%, list=8%, signal=15%
KEGG_RETINOL_METABOLISM	KEGG_RETINOL_METABOLISM	64	0.221155	0.784054	0.774262	0.703634	1	12242	tags=30%, list=22%, signal=38%
KEGG_TASTE_TRANSDUCTION	KEGG_TASTE_TRANSDUCTION	51	0.223857	0.739246	0.804481	0.754342	1	9205	tags=31%, list=17%, signal=38%
KEGG_ANTIGEN_PROCESSING_AND_PRESENTATION	KEGG_ANTIGEN_PROCESSING_AND_PRESENTATION	81	0.213103	0.637311	0.808853	0.866317	1	13199	tags=42%, list=24%, signal=55%

## Sheet: downregulated in phenotype I
Table S3. The detailed information of GSEA analysis
NAME	GS<br> follow link to MSigDB	GS DETAILS	SIZE	ES	NES	NOM p-val	FDR q-val	FWER p-val	RANK AT MAX	LEADING EDGE
KEGG_RNA_DEGRADATION	KEGG_RNA_DEGRADATION	Details ...	59	-0.624625	-2.07802	0.00788955	0.0904968	0.045	5748	tags=53%, list=10%, signal=59%
KEGG_VALINE_LEUCINE_AND_ISOLEUCINE_DEGRADATION	KEGG_VALINE_LEUCINE_AND_ISOLEUCINE_DEGRADATION	Details ...	43	-0.714631	-2.05524	0.00409836	0.060217	0.058	4836	tags=51%, list=9%, signal=56%
KEGG_UBIQUITIN_MEDIATED_PROTEOLYSIS	KEGG_UBIQUITIN_MEDIATED_PROTEOLYSIS	Details ...	134	-0.52031	-2.02407	0.00592885	0.0533835	0.072	6254	tags=40%, list=11%, signal=44%
KEGG_PROPANOATE_METABOLISM	KEGG_PROPANOATE_METABOLISM	Details ...	32	-0.661498	-1.94989	0.00567108	0.0790545	0.125	6396	tags=44%, list=12%, signal=49%
KEGG_OOCYTE_MEIOSIS	KEGG_OOCYTE_MEIOSIS	Details ...	112	-0.491124	-1.92481	0.0137255	0.0808248	0.152	4872	tags=32%, list=9%, signal=35%
KEGG_NICOTINATE_AND_NICOTINAMIDE_METABOLISM	KEGG_NICOTINATE_AND_NICOTINAMIDE_METABOLISM	Details ...	24	-0.569039	-1.90297	0.0040404	0.080831	0.177	4483	tags=38%, list=8%, signal=41%
KEGG_MISMATCH_REPAIR	KEGG_MISMATCH_REPAIR	Details ...	23	-0.711403	-1.88467	0.00595238	0.079619	0.194	6193	tags=61%, list=11%, signal=69%
KEGG_LYSINE_DEGRADATION	KEGG_LYSINE_DEGRADATION	Details ...	44	-0.547442	-1.84219	0.008	0.100164	0.257	5263	tags=41%, list=10%, signal=45%
KEGG_AMINO_SUGAR_AND_NUCLEOTIDE_SUGAR_METABOLISM	KEGG_AMINO_SUGAR_AND_NUCLEOTIDE_SUGAR_METABOLISM	Details ...	43	-0.547843	-1.7887	0.0162933	0.132388	0.319	4040	tags=37%, list=7%, signal=40%
KEGG_CELL_CYCLE	KEGG_CELL_CYCLE	Details ...	124	-0.519468	-1.75822	0.0460251	0.148281	0.374	4872	tags=38%, list=9%, signal=41%
KEGG_NUCLEOTIDE_EXCISION_REPAIR	KEGG_NUCLEOTIDE_EXCISION_REPAIR	Details ...	44	-0.569214	-1.74836	0.0345528	0.144232	0.388	2704	tags=36%, list=5%, signal=38%
KEGG_CITRATE_CYCLE_TCA_CYCLE	KEGG_CITRATE_CYCLE_TCA_CYCLE	Details ...	31	-0.660773	-1.74086	0.0376238	0.139382	0.399	6541	tags=52%, list=12%, signal=59%
KEGG_BETA_ALANINE_METABOLISM	KEGG_BETA_ALANINE_METABOLISM	Details ...	22	-0.547964	-1.71873	0.0114723	0.148102	0.432	2266	tags=23%, list=4%, signal=24%
KEGG_FATTY_ACID_METABOLISM	KEGG_FATTY_ACID_METABOLISM	Details ...	42	-0.546249	-1.69757	0.0280561	0.15714	0.468	4703	tags=33%, list=9%, signal=36%
KEGG_HOMOLOGOUS_RECOMBINATION	KEGG_HOMOLOGOUS_RECOMBINATION	Details ...	28	-0.590721	-1.67887	0.038	0.162286	0.495	7824	tags=46%, list=14%, signal=54%
KEGG_P53_SIGNALING_PATHWAY	KEGG_P53_SIGNALING_PATHWAY	Details ...	68	-0.443487	-1.6605	0.0383838	0.17197	0.527	2893	tags=29%, list=5%, signal=31%
KEGG_PROGESTERONE_MEDIATED_OOCYTE_MATURATION	KEGG_PROGESTERONE_MEDIATED_OOCYTE_MATURATION	Details ...	85	-0.423141	-1.65983	0.0315582	0.16232	0.527	6410	tags=33%, list=12%, signal=37%
KEGG_PEROXISOME	KEGG_PEROXISOME	Details ...	78	-0.486811	-1.65041	0.0484848	0.161624	0.542	6541	tags=37%, list=12%, signal=42%
KEGG_LONG_TERM_POTENTIATION	KEGG_LONG_TERM_POTENTIATION	Details ...	70	-0.414526	-1.64764	0.020284	0.1559	0.545	7332	tags=30%, list=13%, signal=35%
KEGG_BUTANOATE_METABOLISM	KEGG_BUTANOATE_METABOLISM	Details ...	34	-0.544704	-1.64484	0.0466019	0.150276	0.548	11152	tags=44%, list=20%, signal=55%
KEGG_REGULATION_OF_AUTOPHAGY	KEGG_REGULATION_OF_AUTOPHAGY		35	-0.474136	-1.64068	0.0120968	0.146292	0.551	3885	tags=26%, list=7%, signal=28%
KEGG_GLYCOSYLPHOSPHATIDYLINOSITOL_GPI_ANCHOR_BIOSYNTHESIS	KEGG_GLYCOSYLPHOSPHATIDYLINOSITOL_GPI_ANCHOR_BIOSYNTHESIS		25	-0.557282	-1.63919	0.0448065	0.141208	0.554	4586	tags=40%, list=8%, signal=44%
KEGG_COLORECTAL_CANCER	KEGG_COLORECTAL_CANCER		62	-0.431416	-1.6249	0.0386965	0.146958	0.584	4343	tags=31%, list=8%, signal=33%
KEGG_INSULIN_SIGNALING_PATHWAY	KEGG_INSULIN_SIGNALING_PATHWAY		137	-0.374002	-1.61567	0.020202	0.148246	0.594	3625	tags=22%, list=7%, signal=23%
KEGG_THYROID_CANCER	KEGG_THYROID_CANCER		29	-0.473825	-1.60383	0.0350877	0.151376	0.619	7891	tags=41%, list=14%, signal=48%
KEGG_PROTEIN_EXPORT	KEGG_PROTEIN_EXPORT		24	-0.63396	-1.59352	0.0715706	0.153946	0.635	9947	tags=54%, list=18%, signal=66%
KEGG_SNARE_INTERACTIONS_IN_VESICULAR_TRANSPORT	KEGG_SNARE_INTERACTIONS_IN_VESICULAR_TRANSPORT		38	-0.453076	-1.57368	0.0366599	0.163874	0.66	4605	tags=34%, list=8%, signal=37%
KEGG_N_GLYCAN_BIOSYNTHESIS	KEGG_N_GLYCAN_BIOSYNTHESIS		46	-0.47636	-1.57175	0.052	0.159579	0.662	10530	tags=46%, list=19%, signal=56%
KEGG_CYSTEINE_AND_METHIONINE_METABOLISM	KEGG_CYSTEINE_AND_METHIONINE_METABOLISM		34	-0.448751	-1.54133	0.0561122	0.181227	0.704	9253	tags=41%, list=17%, signal=49%
KEGG_ALANINE_ASPARTATE_AND_GLUTAMATE_METABOLISM	KEGG_ALANINE_ASPARTATE_AND_GLUTAMATE_METABOLISM		32	-0.452471	-1.51692	0.0457256	0.199055	0.746	5203	tags=25%, list=9%, signal=28%
KEGG_BIOSYNTHESIS_OF_UNSATURATED_FATTY_ACIDS	KEGG_BIOSYNTHESIS_OF_UNSATURATED_FATTY_ACIDS		22	-0.510453	-1.49293	0.0838323	0.216319	0.777	2701	tags=27%, list=5%, signal=29%
KEGG_INOSITOL_PHOSPHATE_METABOLISM	KEGG_INOSITOL_PHOSPHATE_METABOLISM		54	-0.435191	-1.48709	0.0909091	0.215074	0.785	3678	tags=26%, list=7%, signal=28%
KEGG_DNA_REPLICATION	KEGG_DNA_REPLICATION		36	-0.585429	-1.46522	0.160494	0.230546	0.815	7022	tags=44%, list=13%, signal=51%
KEGG_PANCREATIC_CANCER	KEGG_PANCREATIC_CANCER		70	-0.393015	-1.4536	0.0744467	0.236317	0.829	4033	tags=26%, list=7%, signal=28%
KEGG_ENDOCYTOSIS	KEGG_ENDOCYTOSIS		181	-0.338596	-1.43582	0.09	0.249403	0.855	3674	tags=20%, list=7%, signal=21%
KEGG_SPLICEOSOME	KEGG_SPLICEOSOME		127	-0.469212	-1.42894	0.174089	0.250128	0.862	7423	tags=36%, list=13%, signal=42%
KEGG_RIG_I_LIKE_RECEPTOR_SIGNALING_PATHWAY	KEGG_RIG_I_LIKE_RECEPTOR_SIGNALING_PATHWAY		71	-0.375205	-1.42227	0.0918367	0.249978	0.867	4743	tags=25%, list=9%, signal=28%
KEGG_ENDOMETRIAL_CANCER	KEGG_ENDOMETRIAL_CANCER		52	-0.3957	-1.42139	0.104743	0.244474	0.867	4343	tags=27%, list=8%, signal=29%
KEGG_PYRUVATE_METABOLISM	KEGG_PYRUVATE_METABOLISM		40	-0.452684	-1.41322	0.10142	0.24592	0.871	6396	tags=35%, list=12%, signal=40%
KEGG_ETHER_LIPID_METABOLISM	KEGG_ETHER_LIPID_METABOLISM		33	-0.410888	-1.41218	0.0892495	0.241143	0.872	1781	tags=15%, list=3%, signal=16%
KEGG_ERBB_SIGNALING_PATHWAY	KEGG_ERBB_SIGNALING_PATHWAY		87	-0.359333	-1.40515	0.114919	0.242261	0.881	2746	tags=21%, list=5%, signal=22%
KEGG_O_GLYCAN_BIOSYNTHESIS	KEGG_O_GLYCAN_BIOSYNTHESIS		30	-0.451357	-1.39938	0.136735	0.242384	0.889	5003	tags=27%, list=9%, signal=29%
KEGG_AMINOACYL_TRNA_BIOSYNTHESIS	KEGG_AMINOACYL_TRNA_BIOSYNTHESIS		41	-0.528232	-1.39803	0.189024	0.23807	0.889	8132	tags=41%, list=15%, signal=49%
KEGG_NOD_LIKE_RECEPTOR_SIGNALING_PATHWAY	KEGG_NOD_LIKE_RECEPTOR_SIGNALING_PATHWAY		62	-0.397864	-1.39181	0.147177	0.239117	0.892	8936	tags=31%, list=16%, signal=37%
KEGG_NON_SMALL_CELL_LUNG_CANCER	KEGG_NON_SMALL_CELL_LUNG_CANCER		54	-0.373678	-1.38897	0.0959184	0.236694	0.893	2628	tags=20%, list=5%, signal=21%
KEGG_RENAL_CELL_CARCINOMA	KEGG_RENAL_CELL_CARCINOMA		70	-0.379551	-1.38806	0.144033	0.23236	0.894	6176	tags=31%, list=11%, signal=35%
KEGG_BASAL_TRANSCRIPTION_FACTORS	KEGG_BASAL_TRANSCRIPTION_FACTORS		35	-0.432899	-1.37354	0.157371	0.240136	0.908	12472	tags=49%, list=23%, signal=63%
KEGG_T_CELL_RECEPTOR_SIGNALING_PATHWAY	KEGG_T_CELL_RECEPTOR_SIGNALING_PATHWAY		108	-0.381226	-1.37255	0.182752	0.236258	0.909	3287	tags=22%, list=6%, signal=24%
KEGG_APOPTOSIS	KEGG_APOPTOSIS		87	-0.361292	-1.3704	0.109312	0.233585	0.912	2943	tags=22%, list=5%, signal=23%
KEGG_PURINE_METABOLISM	KEGG_PURINE_METABOLISM		158	-0.329111	-1.36441	0.108108	0.234749	0.914	9348	tags=28%, list=17%, signal=34%
KEGG_PHOSPHATIDYLINOSITOL_SIGNALING_SYSTEM	KEGG_PHOSPHATIDYLINOSITOL_SIGNALING_SYSTEM		76	-0.372611	-1.36153	0.14053	0.233067	0.916	11081	tags=33%, list=20%, signal=41%
KEGG_MTOR_SIGNALING_PATHWAY	KEGG_MTOR_SIGNALING_PATHWAY		52	-0.347769	-1.3463	0.108434	0.242688	0.932	2209	tags=21%, list=4%, signal=22%
KEGG_GLYCEROPHOSPHOLIPID_METABOLISM	KEGG_GLYCEROPHOSPHOLIPID_METABOLISM		77	-0.323987	-1.33392	0.0992063	0.250471	0.94	2369	tags=14%, list=4%, signal=15%
KEGG_ALZHEIMERS_DISEASE	KEGG_ALZHEIMERS_DISEASE		165	-0.369582	-1.3316	0.192623	0.248341	0.941	4243	tags=22%, list=8%, signal=24%
KEGG_ALDOSTERONE_REGULATED_SODIUM_REABSORPTION	KEGG_ALDOSTERONE_REGULATED_SODIUM_REABSORPTION		42	-0.386089	-1.32929	0.135189	0.246153	0.944	6064	tags=26%, list=11%, signal=29%
KEGG_HUNTINGTONS_DISEASE	KEGG_HUNTINGTONS_DISEASE		180	-0.362733	-1.32487	0.201232	0.246343	0.946	4243	tags=22%, list=8%, signal=23%
KEGG_PPAR_SIGNALING_PATHWAY	KEGG_PPAR_SIGNALING_PATHWAY		69	-0.355272	-1.32241	0.117764	0.244409	0.949	1848	tags=16%, list=3%, signal=16%
KEGG_TRYPTOPHAN_METABOLISM	KEGG_TRYPTOPHAN_METABOLISM		40	-0.386901	-1.30072	0.160083	0.26148	0.96	4418	tags=23%, list=8%, signal=24%
KEGG_SELENOAMINO_ACID_METABOLISM	KEGG_SELENOAMINO_ACID_METABOLISM		26	-0.431528	-1.29611	0.170168	0.262155	0.962	8752	tags=38%, list=16%, signal=46%
KEGG_ADHERENS_JUNCTION	KEGG_ADHERENS_JUNCTION		73	-0.358846	-1.27363	0.220039	0.279212	0.974	4033	tags=27%, list=7%, signal=30%
KEGG_ASCORBATE_AND_ALDARATE_METABOLISM	KEGG_ASCORBATE_AND_ALDARATE_METABOLISM		25	-0.444227	-1.27341	0.191651	0.274829	0.974	21995	tags=52%, list=40%, signal=86%
KEGG_VASOPRESSIN_REGULATED_WATER_REABSORPTION	KEGG_VASOPRESSIN_REGULATED_WATER_REABSORPTION		44	-0.345324	-1.26379	0.164634	0.279966	0.976	1721	tags=16%, list=3%, signal=16%
KEGG_ADIPOCYTOKINE_SIGNALING_PATHWAY	KEGG_ADIPOCYTOKINE_SIGNALING_PATHWAY		67	-0.339133	-1.25982	0.161034	0.279925	0.977	8068	tags=27%, list=15%, signal=31%
KEGG_FC_EPSILON_RI_SIGNALING_PATHWAY	KEGG_FC_EPSILON_RI_SIGNALING_PATHWAY		79	-0.329372	-1.25664	0.198783	0.278551	0.977	6169	tags=22%, list=11%, signal=24%
KEGG_PYRIMIDINE_METABOLISM	KEGG_PYRIMIDINE_METABOLISM		98	-0.353314	-1.2532	0.233533	0.277275	0.978	4441	tags=20%, list=8%, signal=22%
KEGG_PROSTATE_CANCER	KEGG_PROSTATE_CANCER		89	-0.317131	-1.22226	0.221774	0.303068	0.983	10231	tags=31%, list=19%, signal=39%
KEGG_CHRONIC_MYELOID_LEUKEMIA	KEGG_CHRONIC_MYELOID_LEUKEMIA		73	-0.329204	-1.21759	0.215726	0.30337	0.984	3625	tags=22%, list=7%, signal=23%
KEGG_NEUROTROPHIN_SIGNALING_PATHWAY	KEGG_NEUROTROPHIN_SIGNALING_PATHWAY		126	-0.309811	-1.21357	0.240326	0.303322	0.984	7449	tags=27%, list=13%, signal=31%
KEGG_GNRH_SIGNALING_PATHWAY	KEGG_GNRH_SIGNALING_PATHWAY		101	-0.292146	-1.18861	0.227557	0.324844	0.989	2235	tags=15%, list=4%, signal=15%
KEGG_B_CELL_RECEPTOR_SIGNALING_PATHWAY	KEGG_B_CELL_RECEPTOR_SIGNALING_PATHWAY		75	-0.336707	-1.17437	0.308448	0.334869	0.992	7259	tags=27%, list=13%, signal=31%
KEGG_FRUCTOSE_AND_MANNOSE_METABOLISM	KEGG_FRUCTOSE_AND_MANNOSE_METABOLISM		33	-0.362747	-1.15844	0.295499	0.347682	0.992	2545	tags=18%, list=5%, signal=19%
KEGG_SMALL_CELL_LUNG_CANCER	KEGG_SMALL_CELL_LUNG_CANCER		84	-0.30939	-1.14999	0.294118	0.352164	0.993	9371	tags=27%, list=17%, signal=33%
KEGG_PARKINSONS_DISEASE	KEGG_PARKINSONS_DISEASE		128	-0.361781	-1.13851	0.344622	0.361158	0.994	3421	tags=19%, list=6%, signal=20%
KEGG_STARCH_AND_SUCROSE_METABOLISM	KEGG_STARCH_AND_SUCROSE_METABOLISM		52	-0.317402	-1.12785	0.278752	0.368656	0.994	16875	tags=40%, list=31%, signal=58%
KEGG_GLYCOSPHINGOLIPID_BIOSYNTHESIS_LACTO_AND_NEOLACTO_SERIES	KEGG_GLYCOSPHINGOLIPID_BIOSYNTHESIS_LACTO_AND_NEOLACTO_SERIES		26	-0.345877	-1.12765	0.28	0.364067	0.994	2559	tags=19%, list=5%, signal=20%
KEGG_FC_GAMMA_R_MEDIATED_PHAGOCYTOSIS	KEGG_FC_GAMMA_R_MEDIATED_PHAGOCYTOSIS		96	-0.298433	-1.10537	0.356137	0.384473	0.996	6526	tags=22%, list=12%, signal=25%
KEGG_HISTIDINE_METABOLISM	KEGG_HISTIDINE_METABOLISM		29	-0.33433	-1.08394	0.363458	0.405303	0.996	3485	tags=21%, list=6%, signal=22%
KEGG_DORSO_VENTRAL_AXIS_FORMATION	KEGG_DORSO_VENTRAL_AXIS_FORMATION		24	-0.345026	-1.07316	0.383877	0.413552	0.996	11690	tags=33%, list=21%, signal=42%
KEGG_SPHINGOLIPID_METABOLISM	KEGG_SPHINGOLIPID_METABOLISM		39	-0.31206	-1.05519	0.350515	0.431043	0.998	15695	tags=46%, list=28%, signal=64%
KEGG_ABC_TRANSPORTERS	KEGG_ABC_TRANSPORTERS		44	-0.283046	-1.0423	0.398438	0.441221	0.998	1626	tags=11%, list=3%, signal=12%
KEGG_PROXIMAL_TUBULE_BICARBONATE_RECLAMATION	KEGG_PROXIMAL_TUBULE_BICARBONATE_RECLAMATION		23	-0.333759	-1.0403	0.396694	0.438202	0.998	4540	tags=26%, list=8%, signal=28%
KEGG_JAK_STAT_SIGNALING_PATHWAY	KEGG_JAK_STAT_SIGNALING_PATHWAY		155	-0.263841	-1.01748	0.427711	0.461832	0.998	10447	tags=22%, list=19%, signal=27%
KEGG_TYPE_II_DIABETES_MELLITUS	KEGG_TYPE_II_DIABETES_MELLITUS		47	-0.285086	-1.00692	0.435644	0.469985	0.999	5607	tags=19%, list=10%, signal=21%
KEGG_PENTOSE_AND_GLUCURONATE_INTERCONVERSIONS	KEGG_PENTOSE_AND_GLUCURONATE_INTERCONVERSIONS		28	-0.326943	-1.0046	0.440385	0.466999	0.999	16646	tags=36%, list=30%, signal=51%
KEGG_TOLL_LIKE_RECEPTOR_SIGNALING_PATHWAY	KEGG_TOLL_LIKE_RECEPTOR_SIGNALING_PATHWAY		102	-0.276315	-1.00413	0.431452	0.462084	0.999	3675	tags=14%, list=7%, signal=15%
KEGG_GLYCEROLIPID_METABOLISM	KEGG_GLYCEROLIPID_METABOLISM		49	-0.259305	-0.988245	0.443359	0.477225	0.999	4188	tags=14%, list=8%, signal=15%
KEGG_OXIDATIVE_PHOSPHORYLATION	KEGG_OXIDATIVE_PHOSPHORYLATION		131	-0.32105	-0.974505	0.465839	0.489411	0.999	7491	tags=23%, list=14%, signal=26%
KEGG_PENTOSE_PHOSPHATE_PATHWAY	KEGG_PENTOSE_PHOSPHATE_PATHWAY		27	-0.325455	-0.952508	0.517382	0.512046	1	15441	tags=37%, list=28%, signal=51%
KEGG_NATURAL_KILLER_CELL_MEDIATED_CYTOTOXICITY	KEGG_NATURAL_KILLER_CELL_MEDIATED_CYTOTOXICITY		132	-0.256361	-0.93042	0.524096	0.537521	1	7097	tags=19%, list=13%, signal=22%
KEGG_BASE_EXCISION_REPAIR	KEGG_BASE_EXCISION_REPAIR		35	-0.316809	-0.926612	0.501023	0.536247	1	7022	tags=23%, list=13%, signal=26%
KEGG_PORPHYRIN_AND_CHLOROPHYLL_METABOLISM	KEGG_PORPHYRIN_AND_CHLOROPHYLL_METABOLISM		41	-0.27166	-0.904955	0.591182	0.561118	1	13445	tags=27%, list=24%, signal=35%
KEGG_DRUG_METABOLISM_OTHER_ENZYMES	KEGG_DRUG_METABOLISM_OTHER_ENZYMES		51	-0.243798	-0.893344	0.613153	0.570931	1	21417	tags=39%, list=39%, signal=64%
KEGG_NITROGEN_METABOLISM	KEGG_NITROGEN_METABOLISM		23	-0.252711	-0.807798	0.7357	0.688235	1	16549	tags=35%, list=30%, signal=50%
KEGG_LINOLEIC_ACID_METABOLISM	KEGG_LINOLEIC_ACID_METABOLISM		29	-0.240089	-0.794569	0.747082	0.700357	1	2112	tags=7%, list=4%, signal=7%
KEGG_SYSTEMIC_LUPUS_ERYTHEMATOSUS	KEGG_SYSTEMIC_LUPUS_ERYTHEMATOSUS		135	-0.276395	-0.759456	0.690335	0.743966	1	12058	tags=36%, list=22%, signal=45%
KEGG_PROTEASOME	KEGG_PROTEASOME		46	-0.275825	-0.702964	0.740206	0.813048	1	7611	tags=22%, list=14%, signal=25%
KEGG_PRIMARY_IMMUNODEFICIENCY	KEGG_PRIMARY_IMMUNODEFICIENCY		35	-0.248829	-0.6804	0.763566	0.834674	1	2506	tags=9%, list=5%, signal=9%
KEGG_CYTOSOLIC_DNA_SENSING_PATHWAY	KEGG_CYTOSOLIC_DNA_SENSING_PATHWAY		55	-0.166809	-0.596678	0.955466	0.918153	1	20475	tags=35%, list=37%, signal=55%
KEGG_OLFACTORY_TRANSDUCTION	KEGG_OLFACTORY_TRANSDUCTION		383	-0.116624	-0.357276	1	0.997855	1	26396	tags=38%, list=48%, signal=73%
