# Supplementary material for: Construction and validation of an RNA-binding protein-associated prognostic model for colorectal cancer
Source: PeerJ. 2021 Apr 5;9:e11219. doi: 10.7717/peerj.11219 (PMC8029696; doi:10.7717/peerj.11219)
Supplement: Supplemental Information 4 [file peerj-09-11219-s004.xlsx]

## Sheet: Supplementary material 4
Table S4. The detailed information of the PPI network
MCODE App Results
Date: 2020-5-3 16:22:25
Parameters:
Network Scoring:
Include Loops: false Degree Cutoff: 2
Cluster Finding:
Node Score Cutoff: 0.2 Haircut: true Fluff: false K-Core: 2 Max. Depth from Seed: 100
Cluster	Score (Density*#Nodes)	Nodes	Edges	Node IDs
1	16.941	18	144	DQX1, BYSL, BOP1, PUS7, METTL1, DKC1, DDX47, NOP56, RRP9, DCAF13, UTP14A, CMSS1, TRMT1, NOP2, RBM28, RRP12, DDX31, RRS1
2	7	9	28	PTBP2, ELAVL4, RBM24, RBFOX3, RBPMS2, NOVA1, CELF4, MBNL1, ELAVL3
3	5	5	10	TLR3, TLR7, RNASEL, OASL, IFIT1
4	4.8	6	12	PIWIL1, EZH2, DNMT3B, TERT, EXO1, BRCA1
5	4	4	6	NXF2B, NXF2, NXT1, RAE1
6	3	3	3	RPL22L1, RPL3L, RPL10L
