# Supplementary material for: Construction and validation of an RNA-binding protein-associated prognostic model for colorectal cancer
Source: PeerJ. 2021 Apr 5;9:e11219. doi: 10.7717/peerj.11219 (PMC8029696; doi:10.7717/peerj.11219)
Supplement: Supplemental Information 5 [file peerj-09-11219-s005.xlsx]

## Sheet: Supplementary material 5
Table S5. The detailed information of the co-expression analysis
protein1	protein2	cor	pvalue
RRS1	BOP1	0.659	2.49772e-87
PPARGC1A	RBM47	0.702	1.19164e-103
PPARGC1A	RAVER2	0.659	2.06696e-87
PPARGC1A	CPEB3	0.637	5.87337e-80
PPARGC1B	RBM47	0.711	9.81604e-108
PPARGC1B	RAVER2	0.627	8.56212e-77
PPARGC1B	LRRFIP2	0.612	2.18552e-72
CELF4	LUZP4	0.642	9.433e-82
NOVA1	RBFOX3	0.68	2.95413e-95
NOVA1	ELAVL4	0.721	7.25424e-112
NOVA1	DZIP1	0.709	1.22926e-106
NOVA1	SAMD4A	0.608	4.93841e-71
NOVA1	ZCCHC24	0.711	7.90156e-108
NOVA1	AFF3	0.771	2.78421e-137
NOVA1	RBM20	0.611	4.3332e-72
NOVA1	ENOX1	0.74	5.51058e-121
NOVA1	RBPMS2	0.854	2.14894e-198
NOVA1	CPEB1	0.839	1.69618e-184
