# Supplementary figures and images for: Construction and validation of an RNA-binding protein-associated prognostic model for colorectal cancer
Source: PeerJ journal article supplement (doi:10.7717/peerj.11219), 2021-04-05

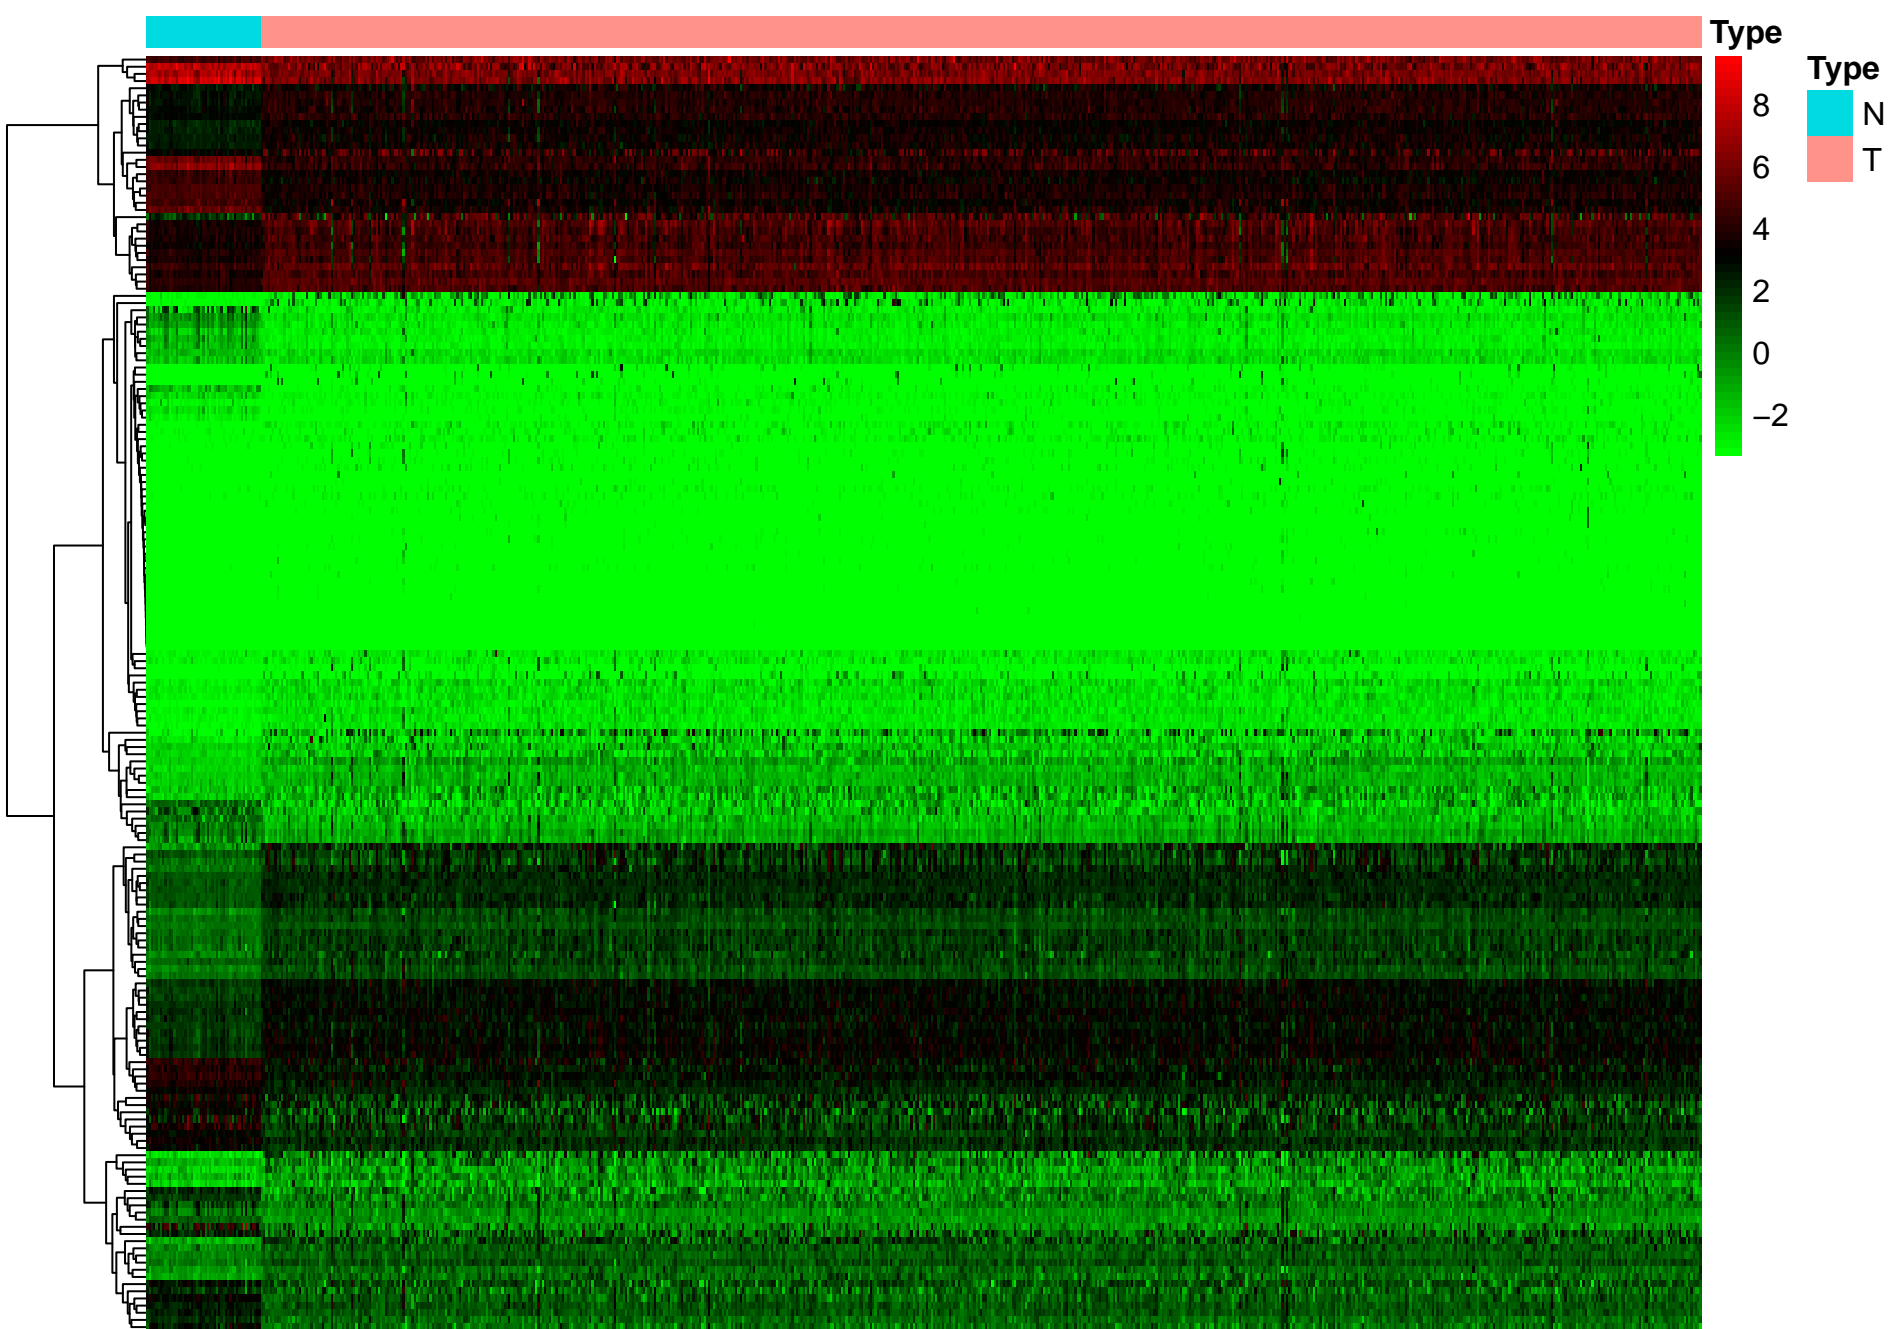

Supplement: raw_data.zip [file raw_data.zip]

**Cor=0.839 (p=1.696e-184)**

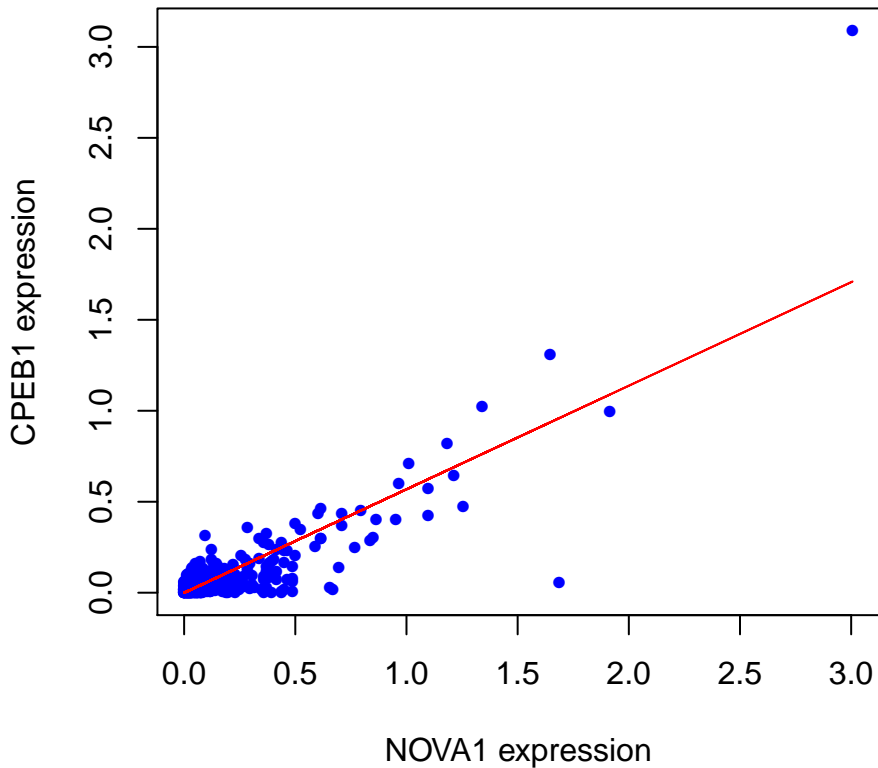

Supplement: raw_data.zip [file raw_data.zip]

**Cor=0.854 (p=2.149e-198)**

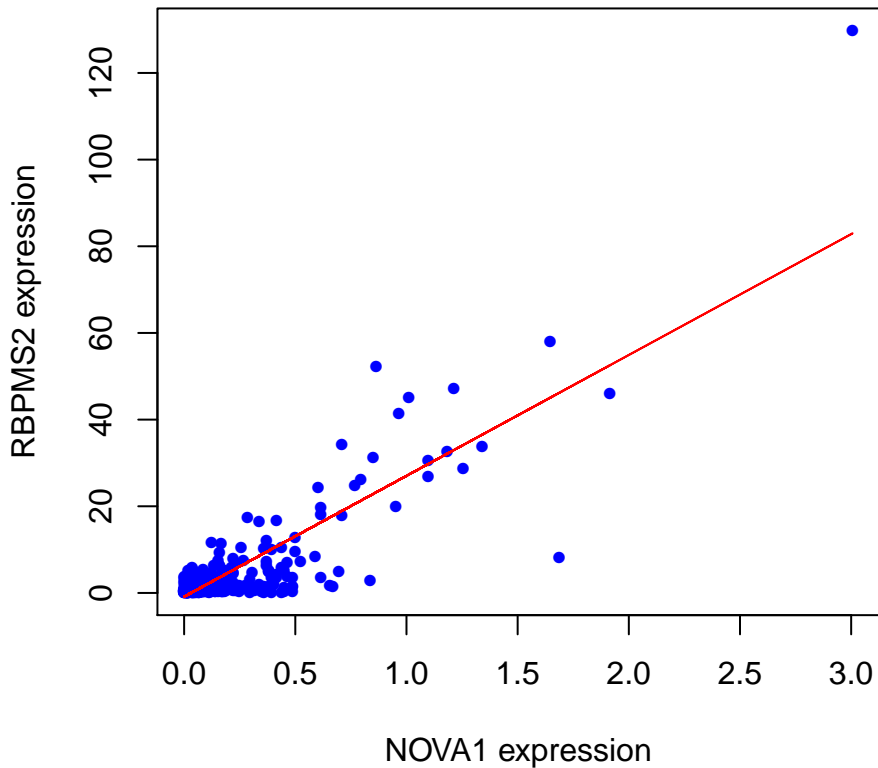

Supplement: raw_data.zip [file raw_data.zip]

**Cor=0.771 (p=2.784e-137)**

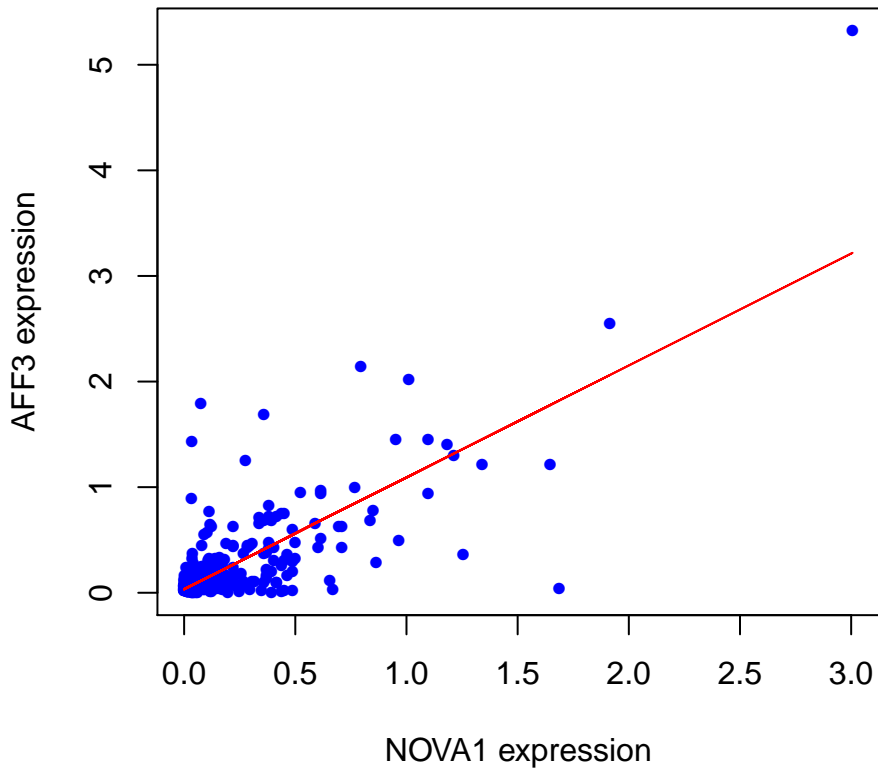

Supplement: raw_data.zip [file raw_data.zip]

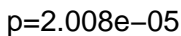

Risk High risk  
Low risk

Supplement: raw_data.zip [file raw_data.zip]

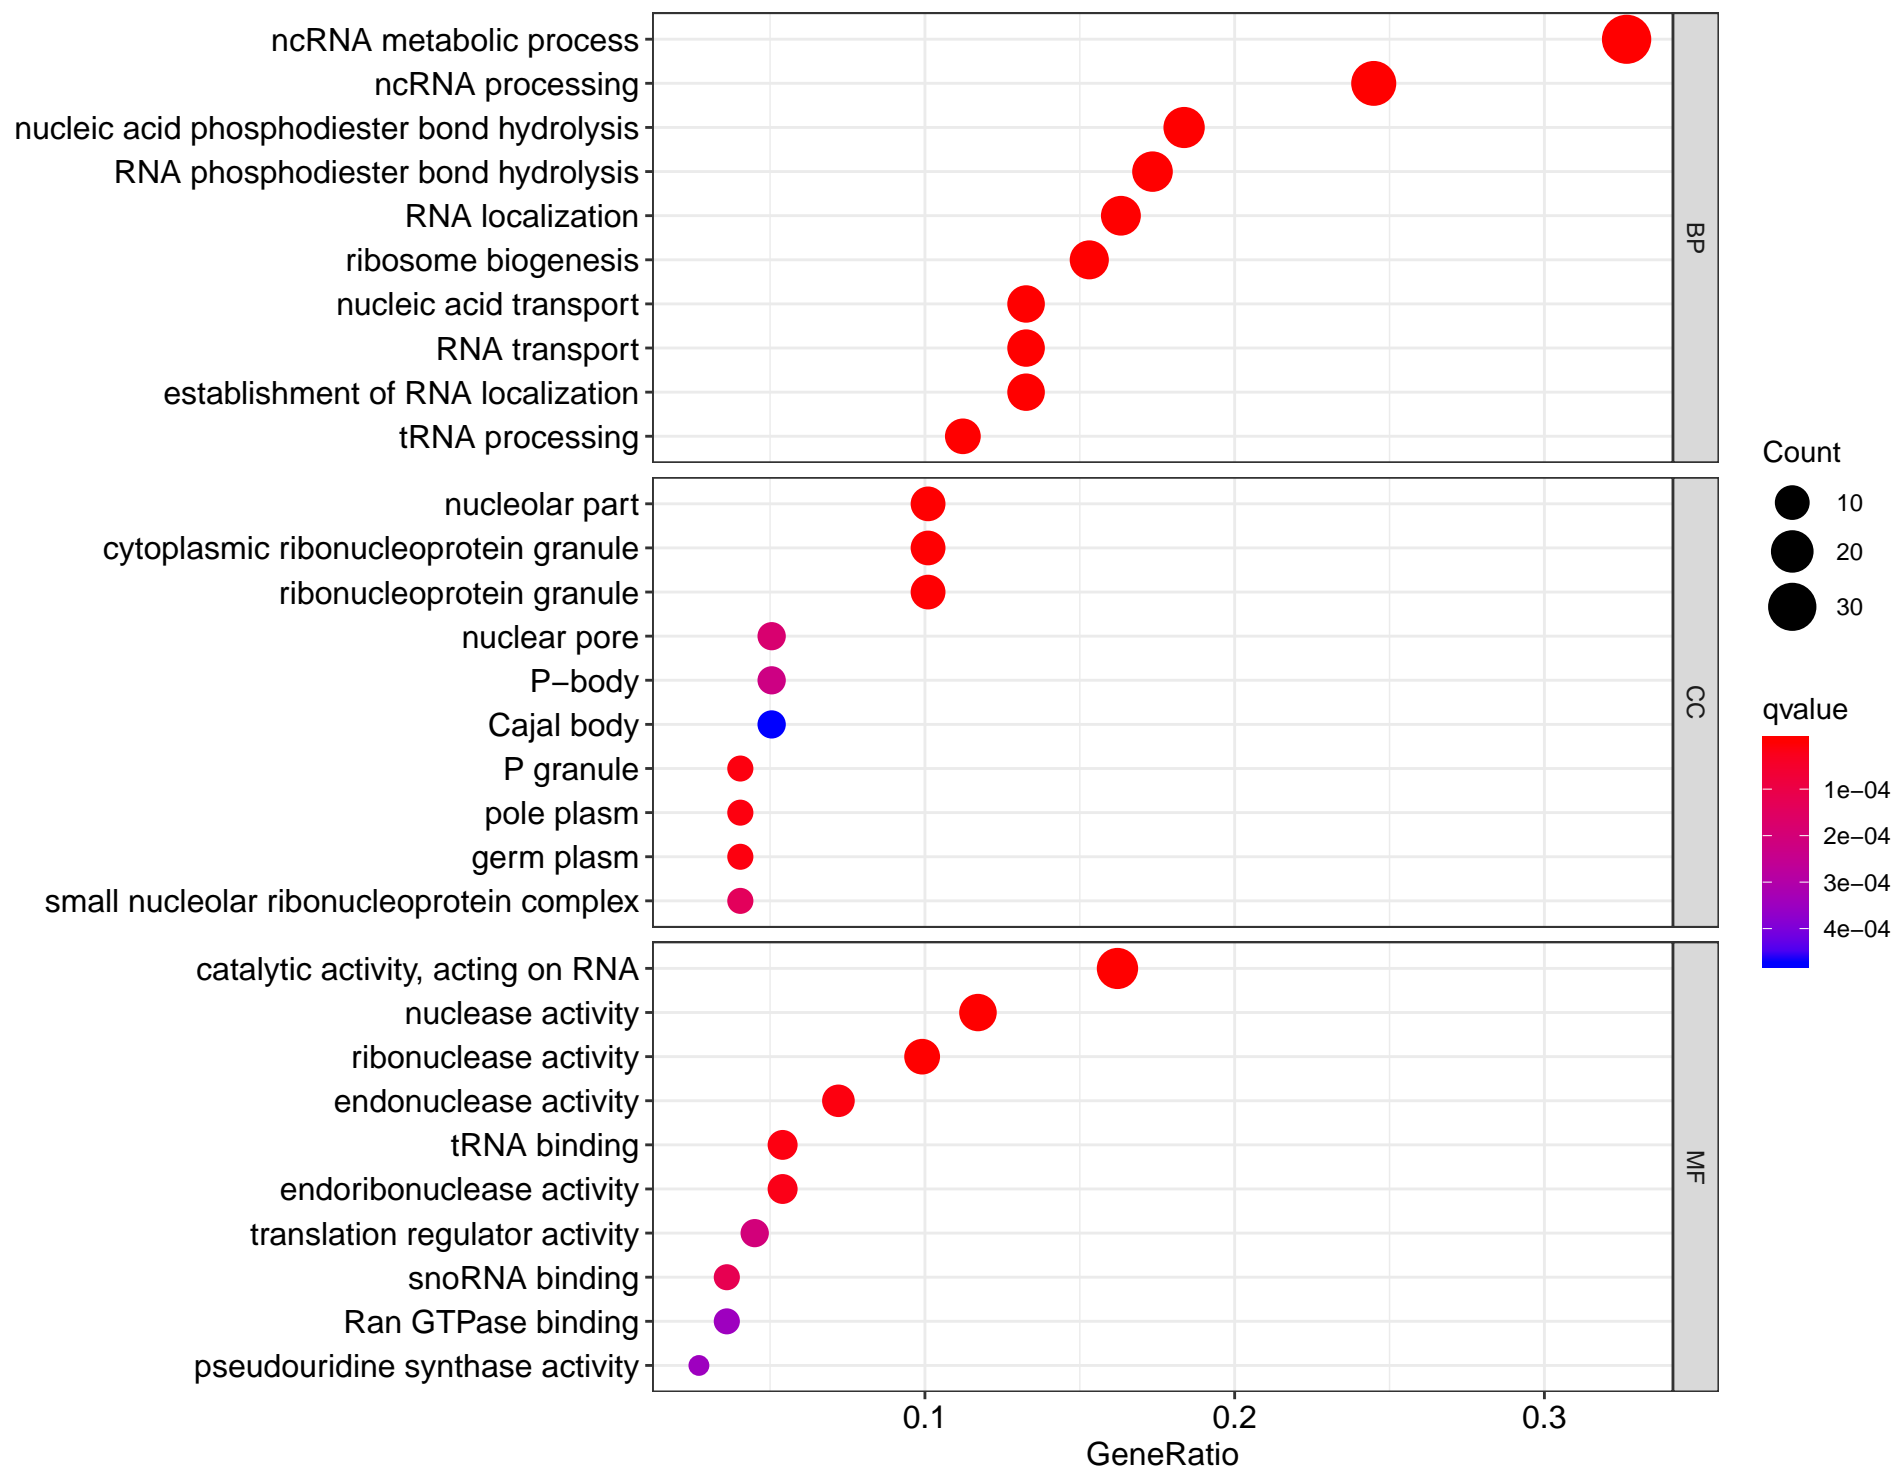

Supplement: raw_data.zip [file raw_data.zip]

**Cor=0.612 (p=2.186e-72)**

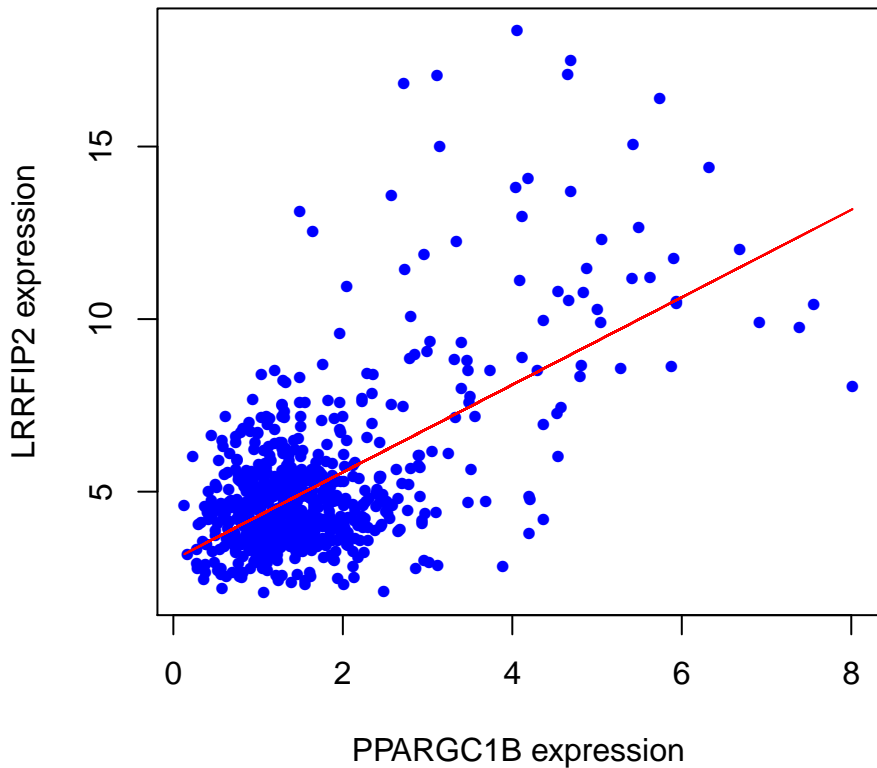

Supplement: raw_data.zip [file raw_data.zip]

**Cor=0.721 (p=7.254e-112)**

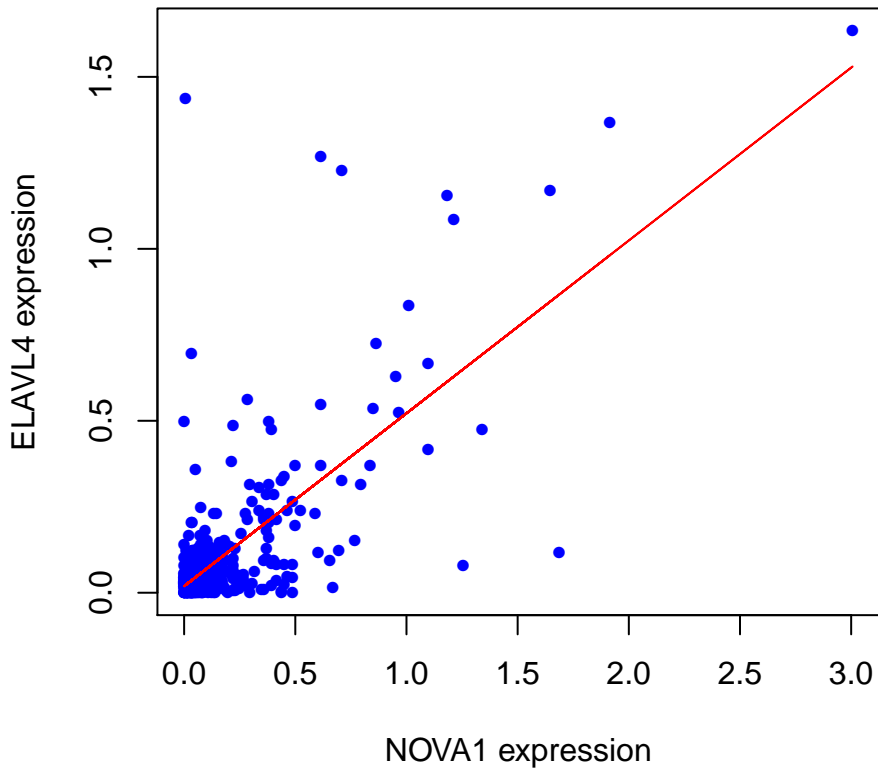

Supplement: raw_data.zip [file raw_data.zip]

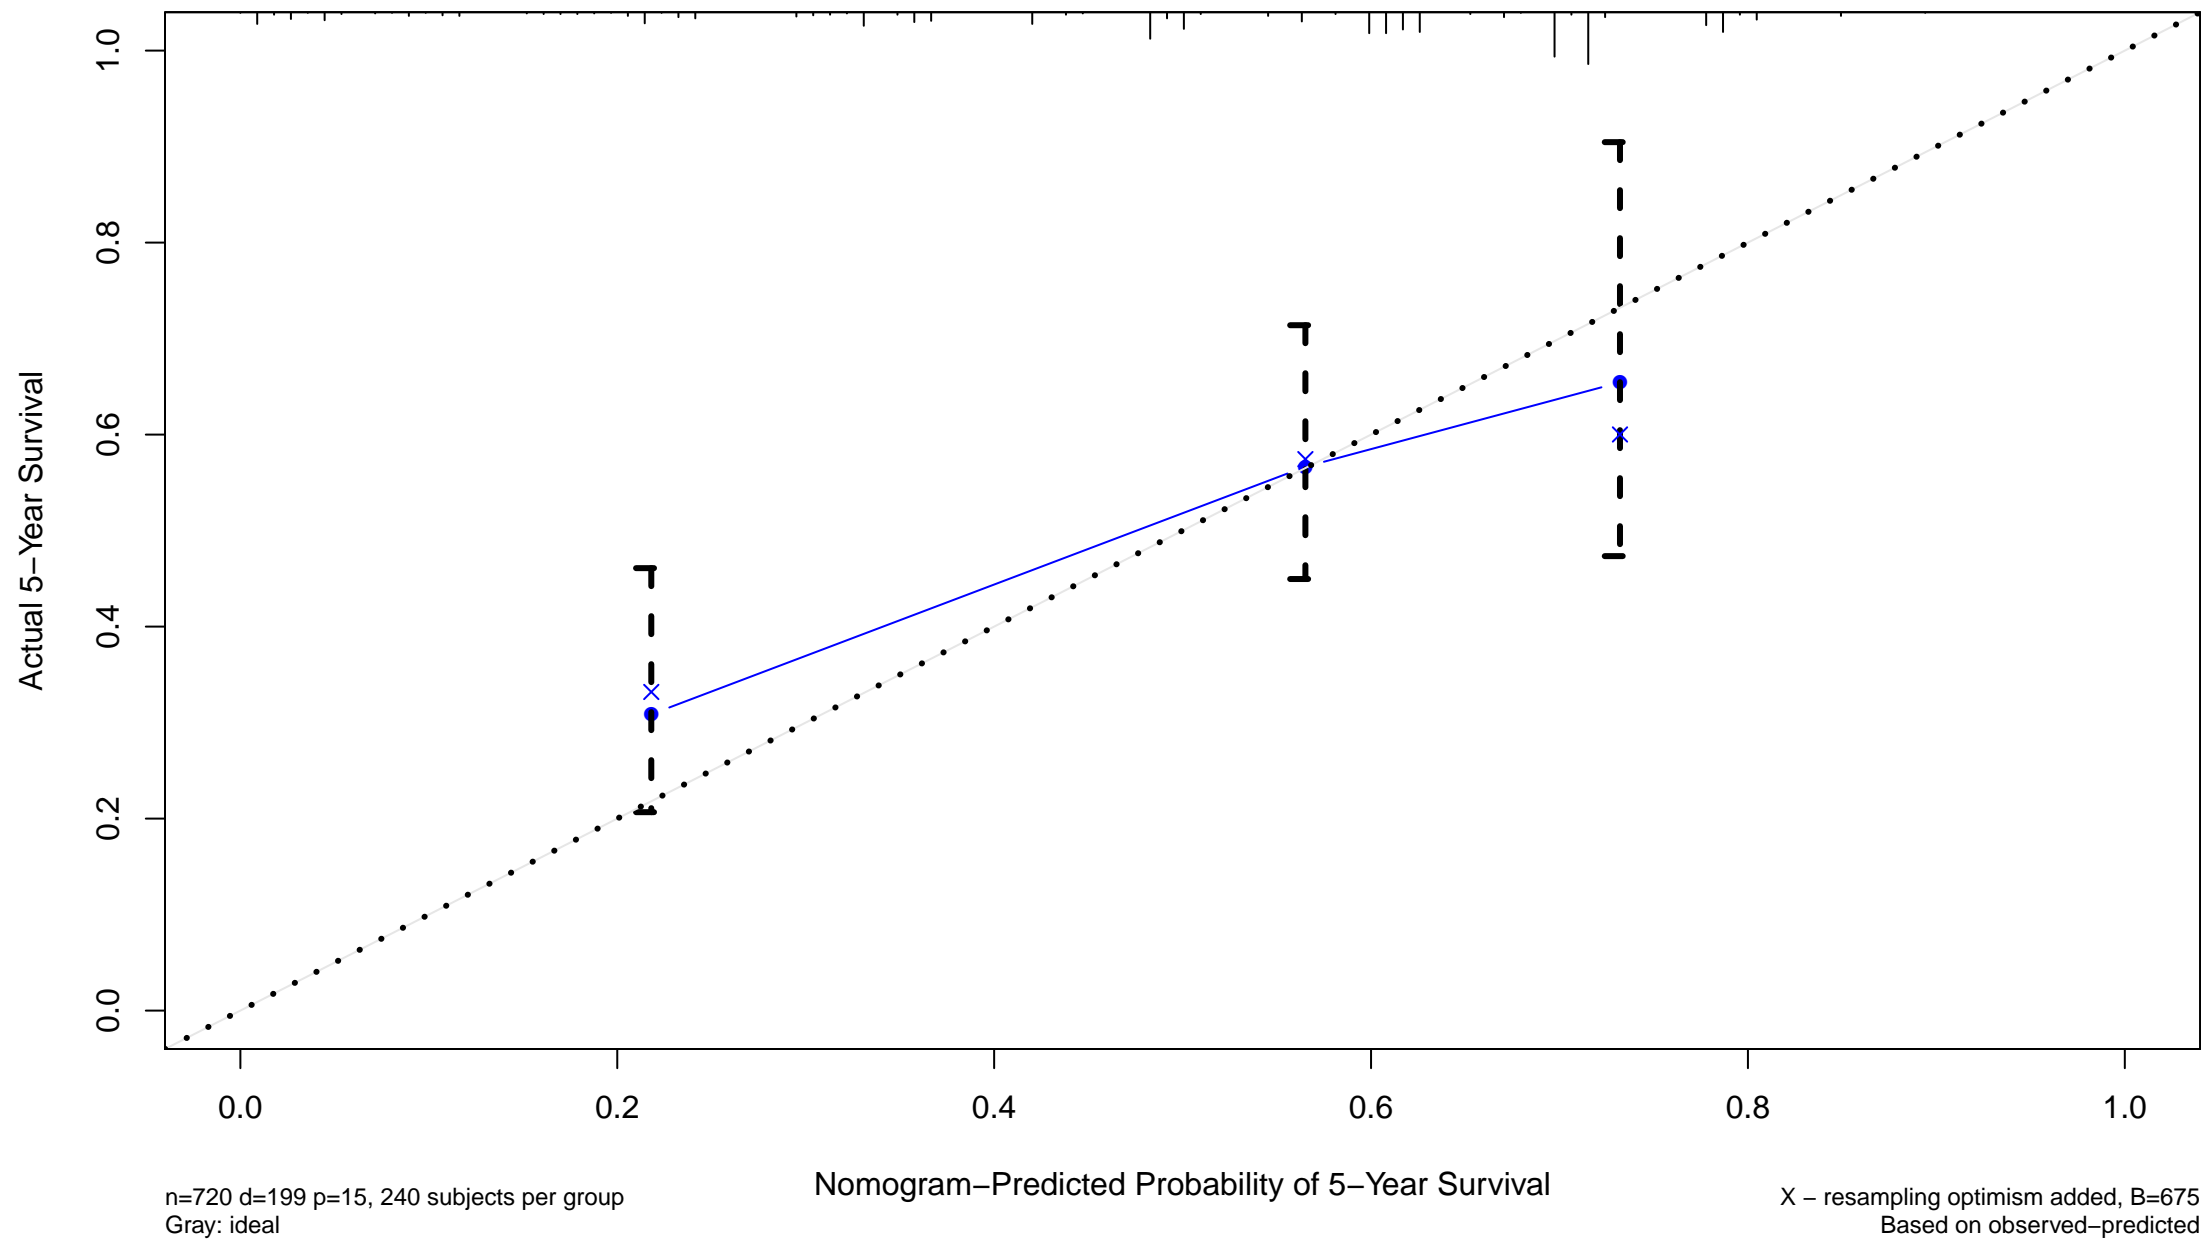

Supplement: raw_data.zip [file raw_data.zip]

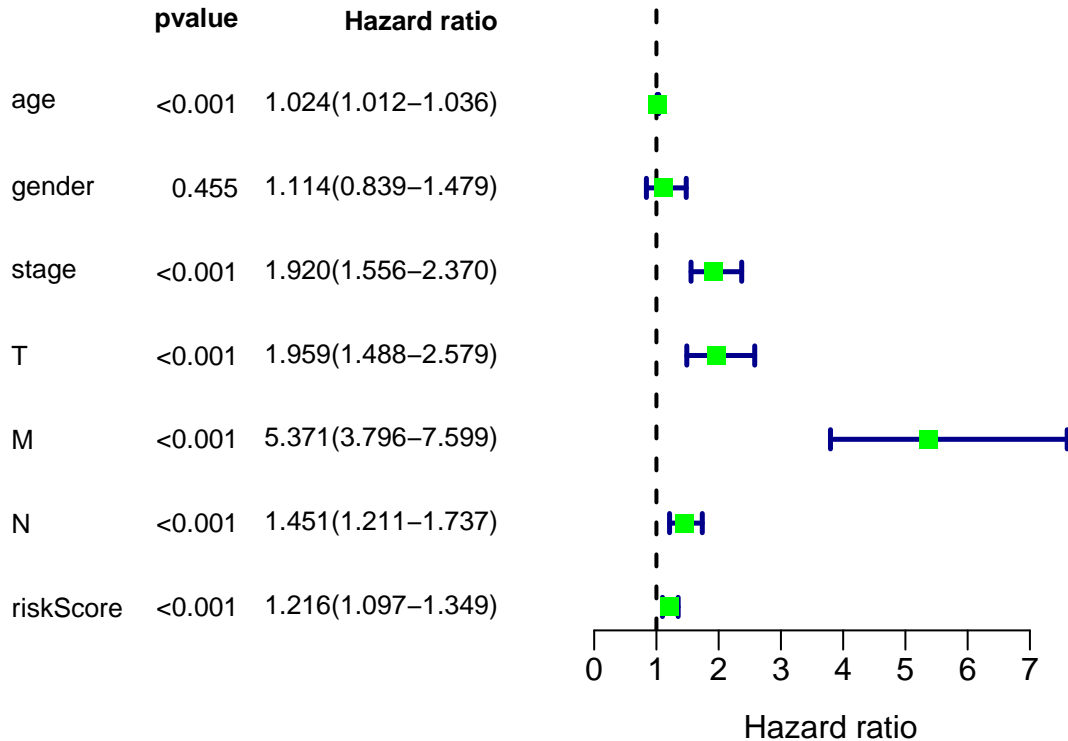

Supplement: raw_data.zip [file raw_data.zip]

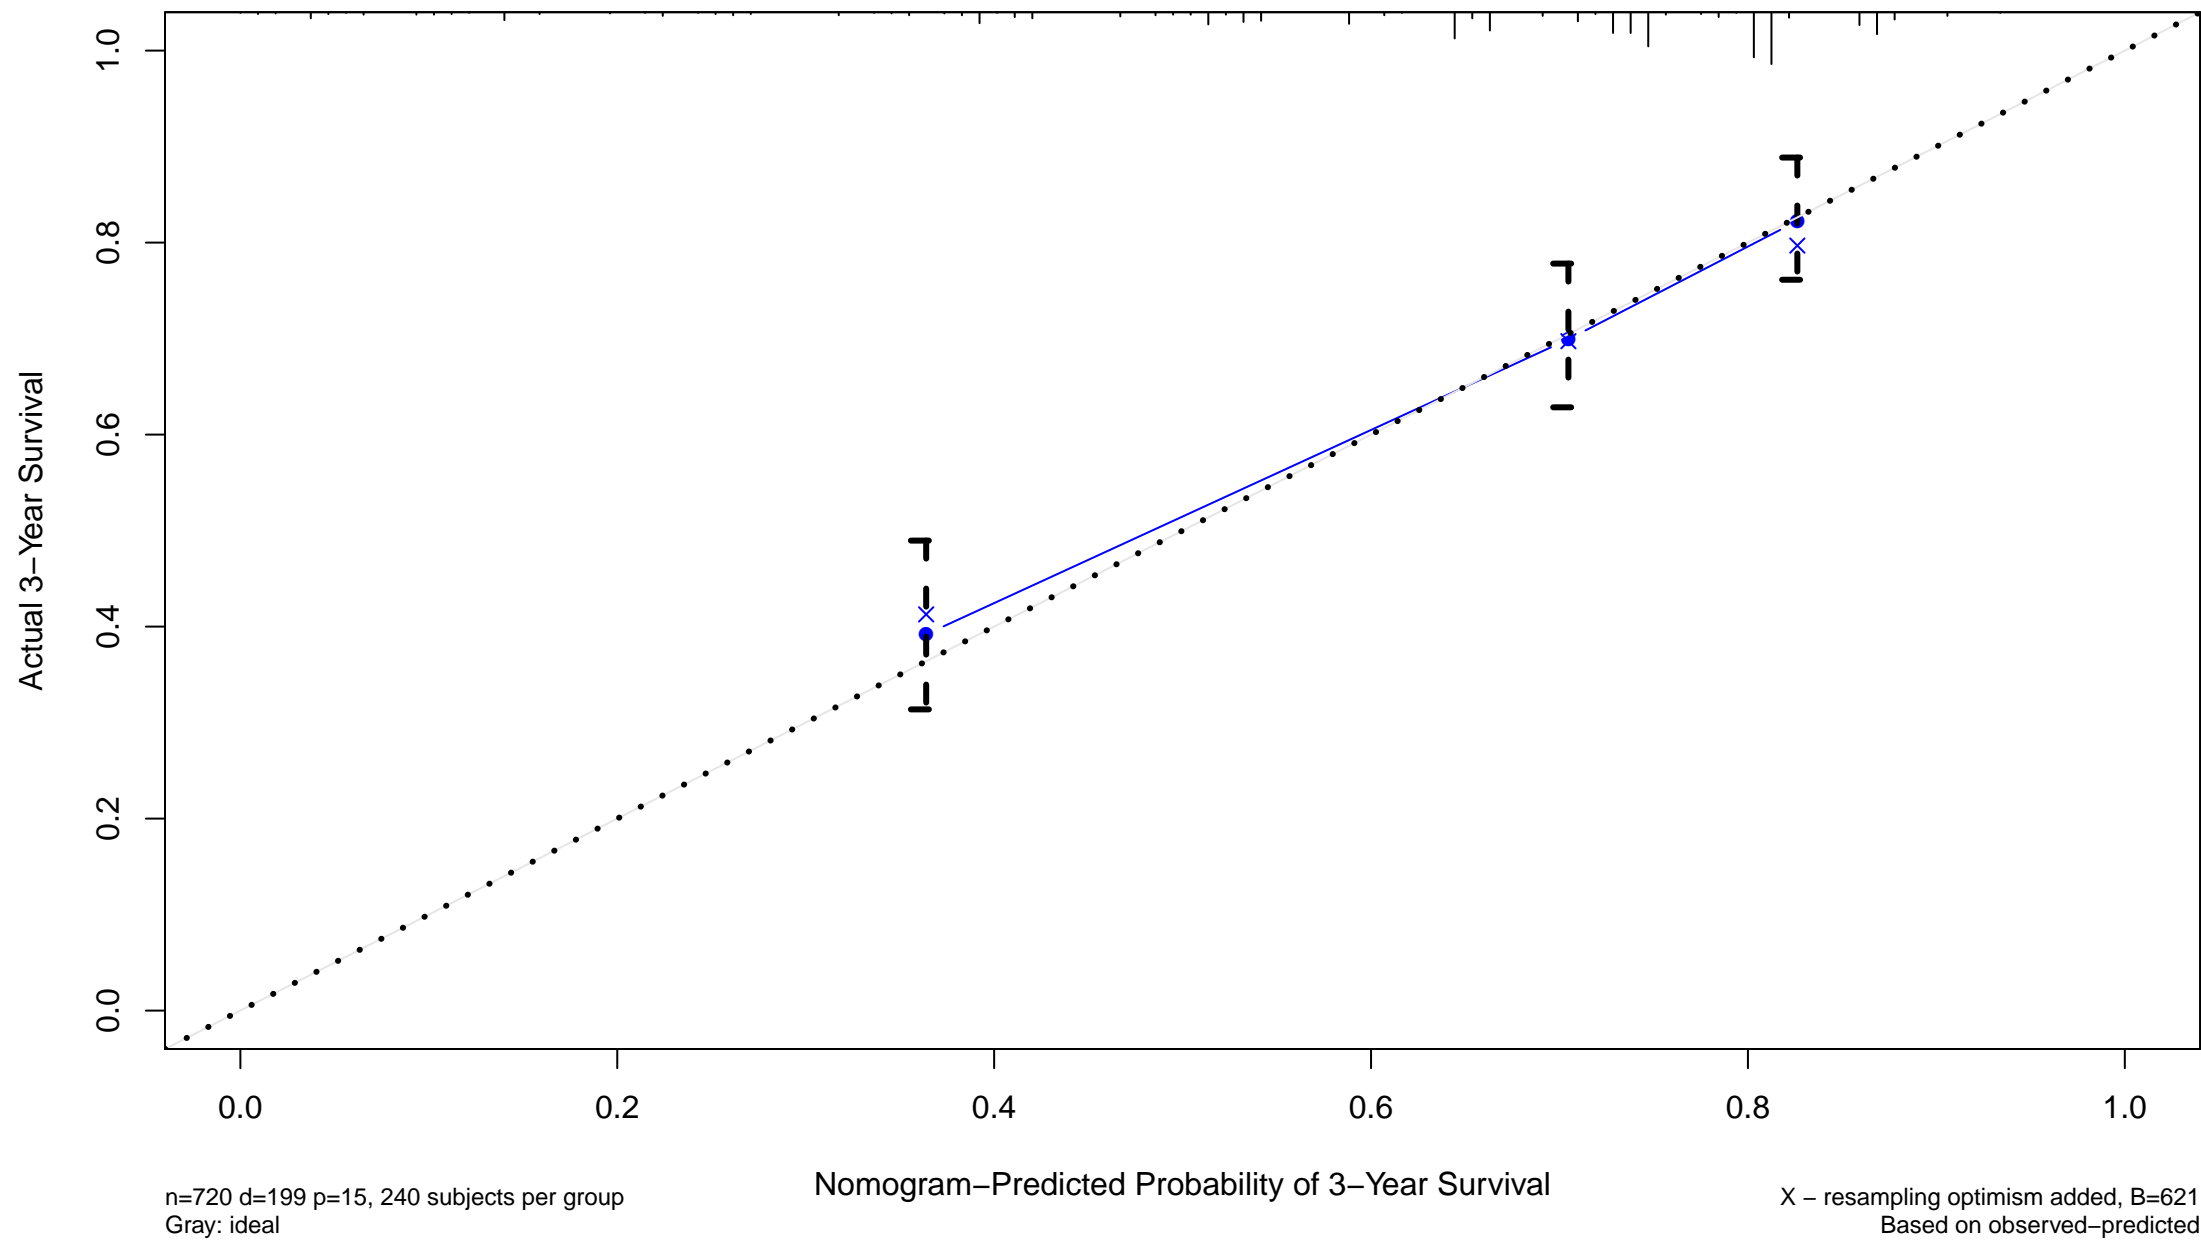

Supplement: raw_data.zip [file raw_data.zip]

Risk + High risk + Low risk

Survival probability

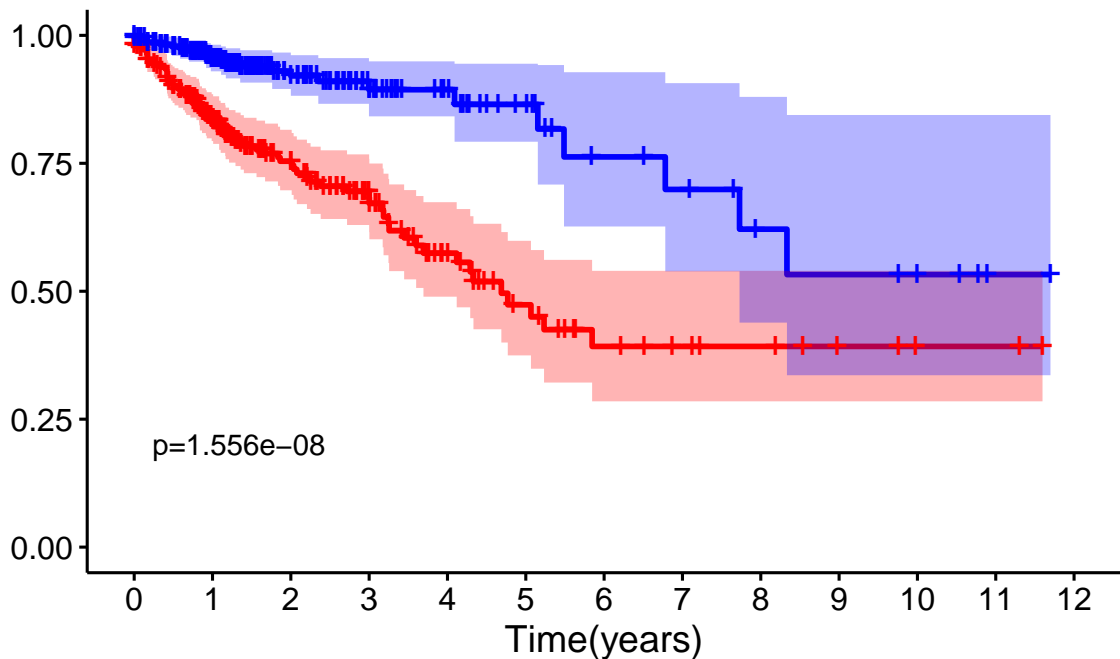

$p=1.556e-08$

Risk High risk  
Low risk

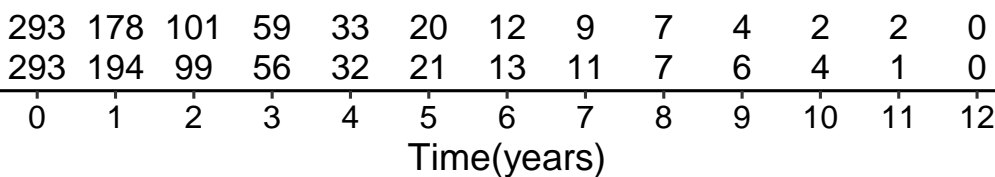

Supplement: raw_data.zip [file raw_data.zip]

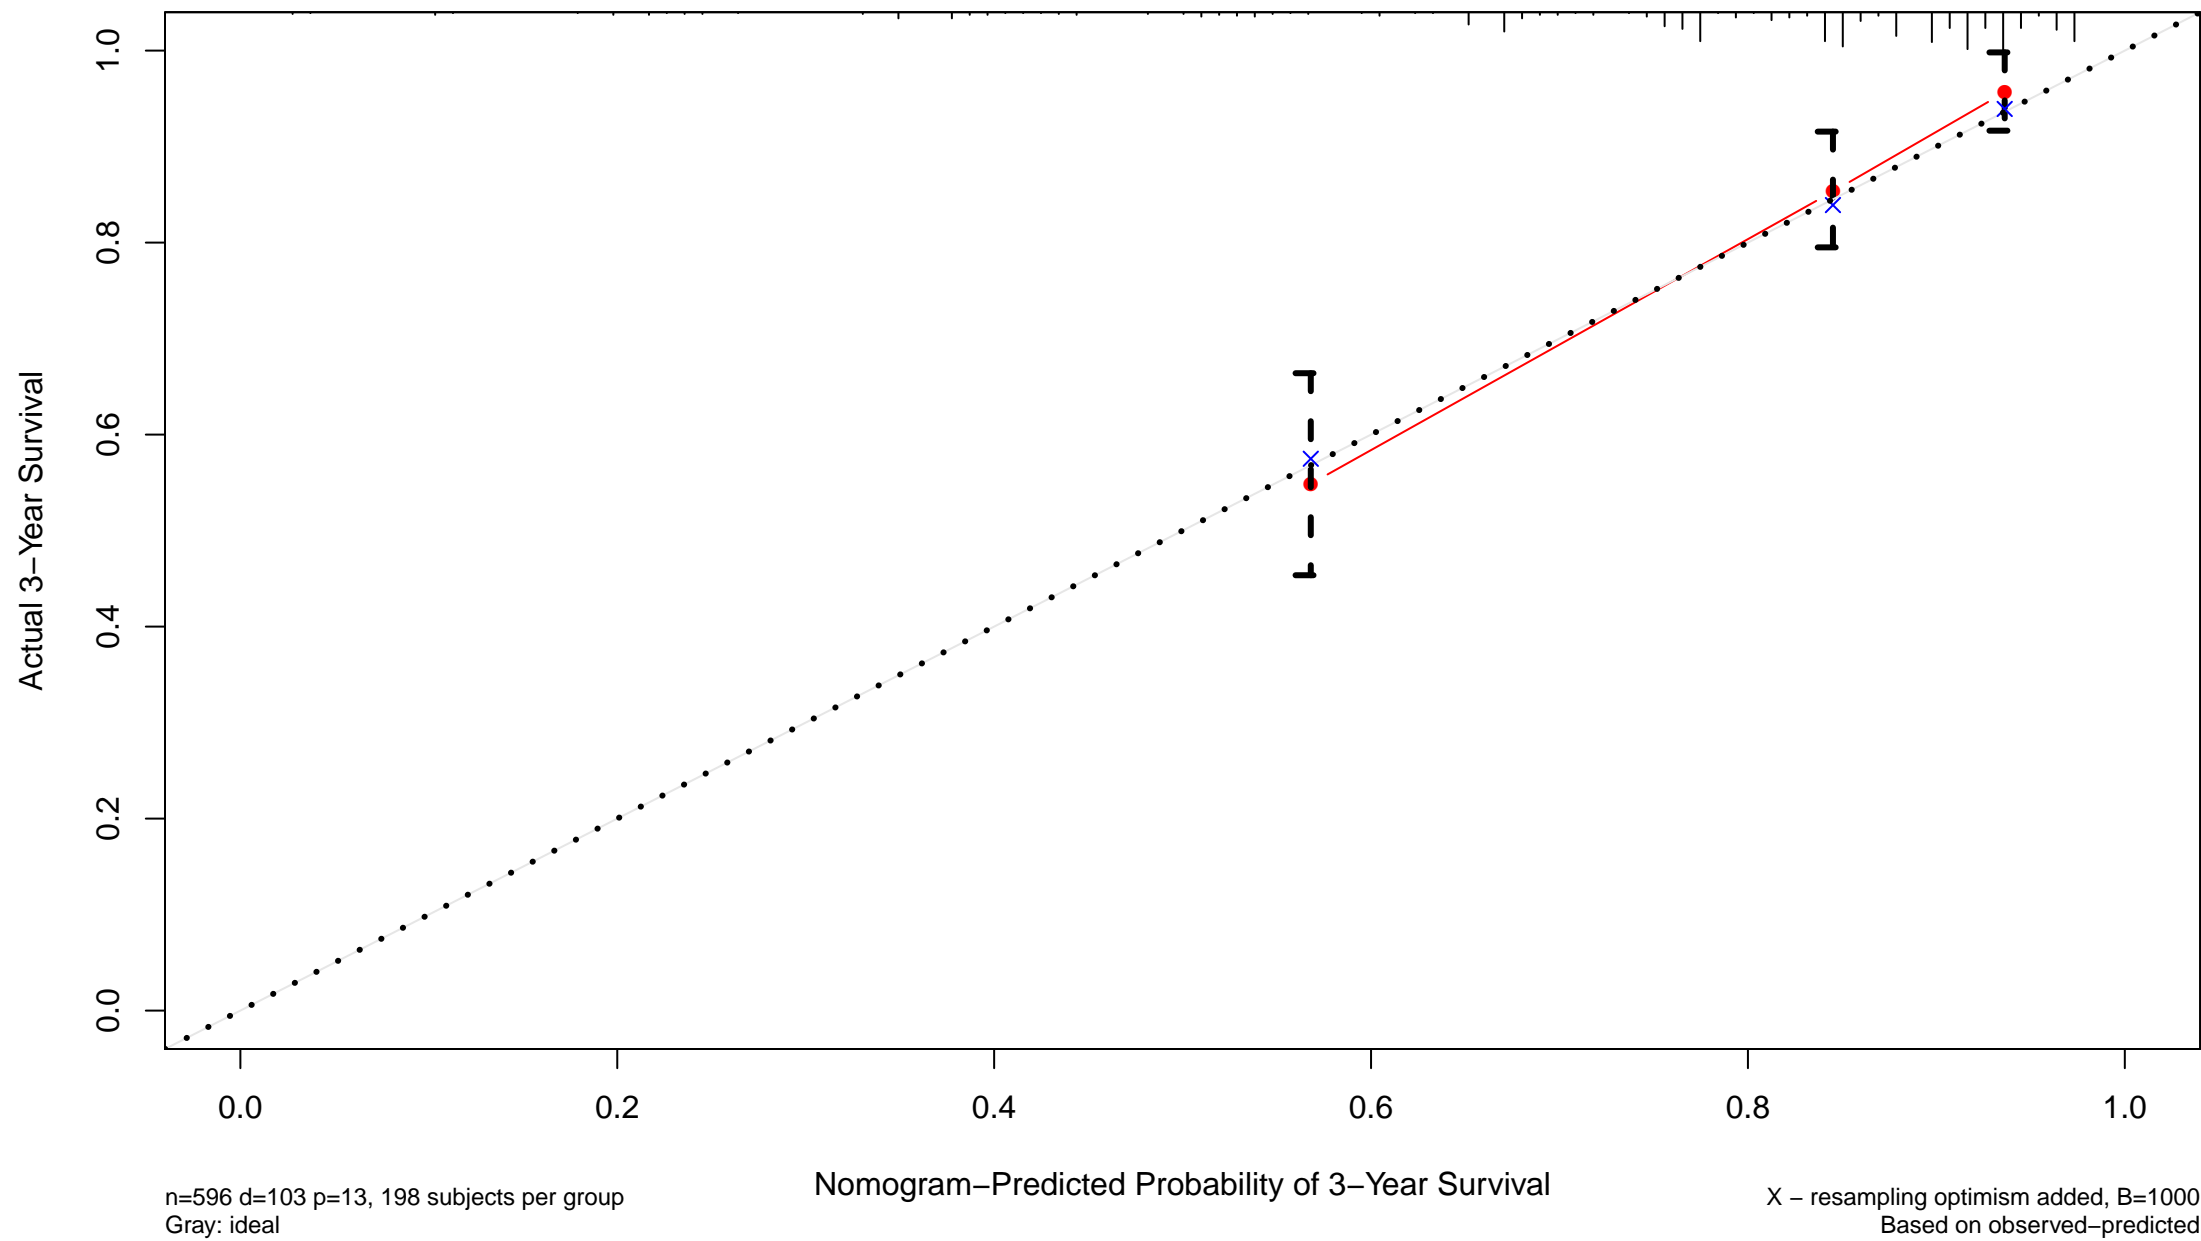

Supplement: raw_data.zip [file raw_data.zip]

**ROC curve ( AUC = 0.712 )**

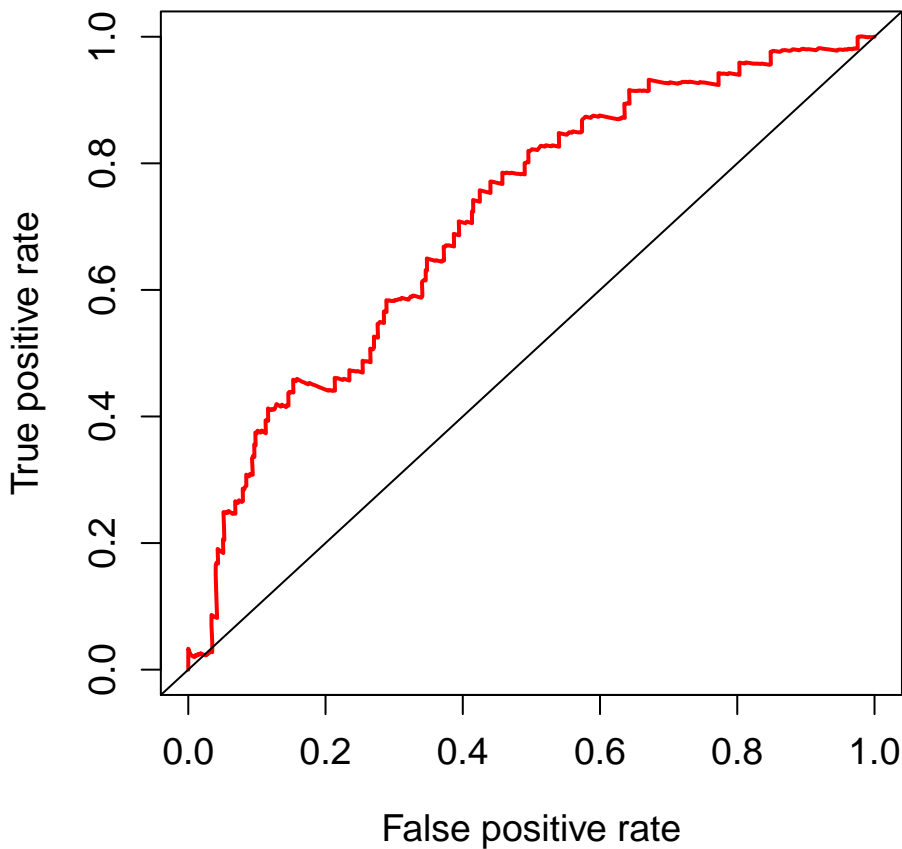

Supplement: raw_data.zip [file raw_data.zip]

**Cor=0.659 (p=2.067e-87)**

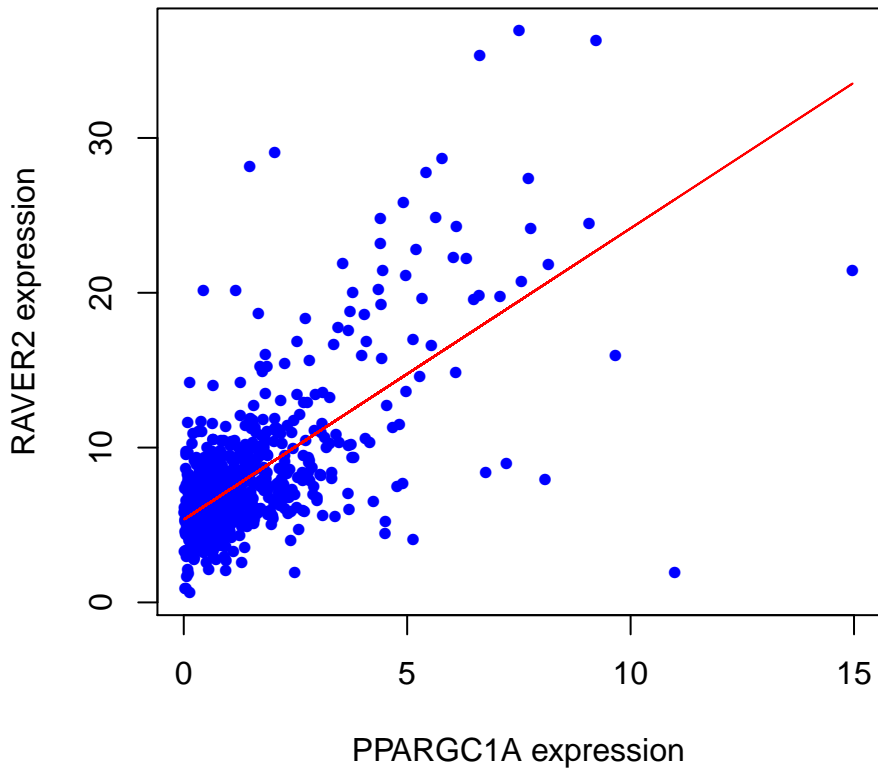

Supplement: raw_data.zip [file raw_data.zip]

**Cor=0.68 ( $p=2.954e-95$ )**

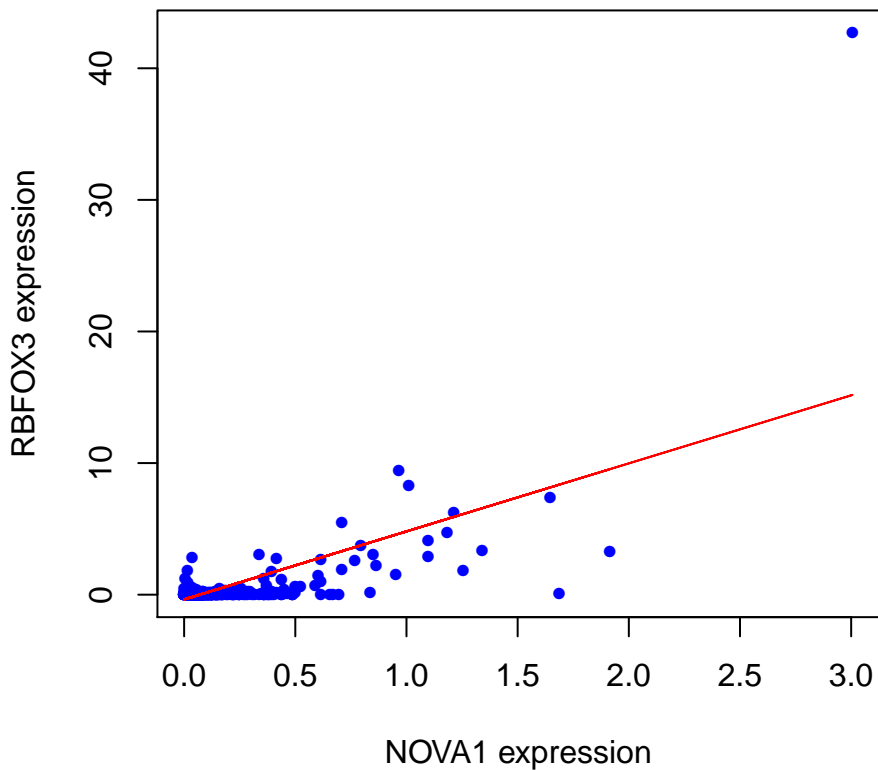

Supplement: raw_data.zip [file raw_data.zip]

**Cor=0.659 (p=2.498e-87)**

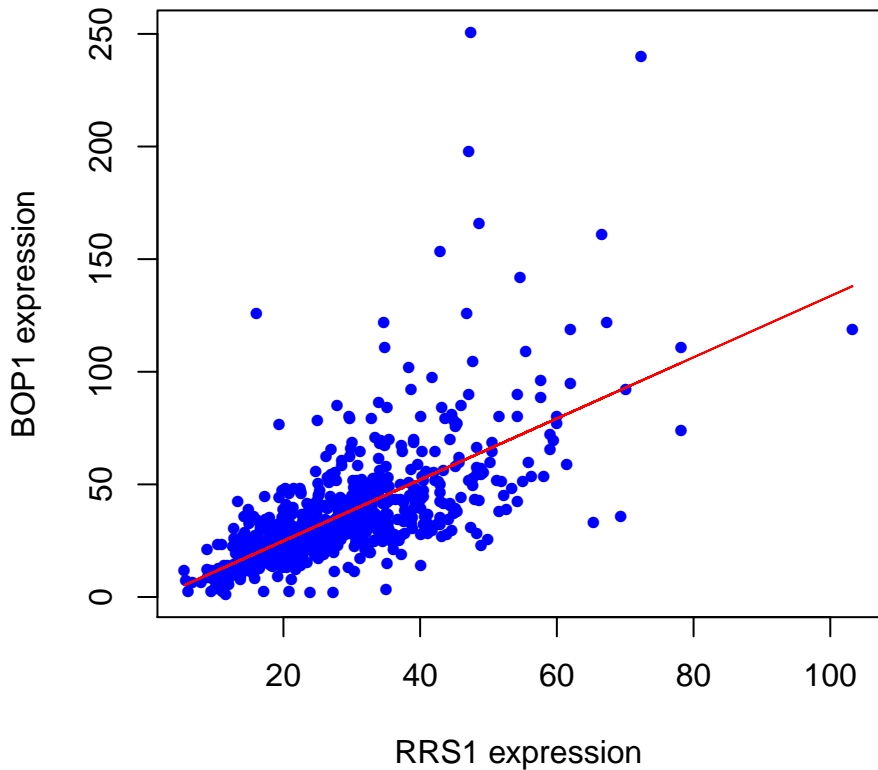

Supplement: raw_data.zip [file raw_data.zip]

**Cor=0.74 ( $p=5.511\text{e-}121$ )**

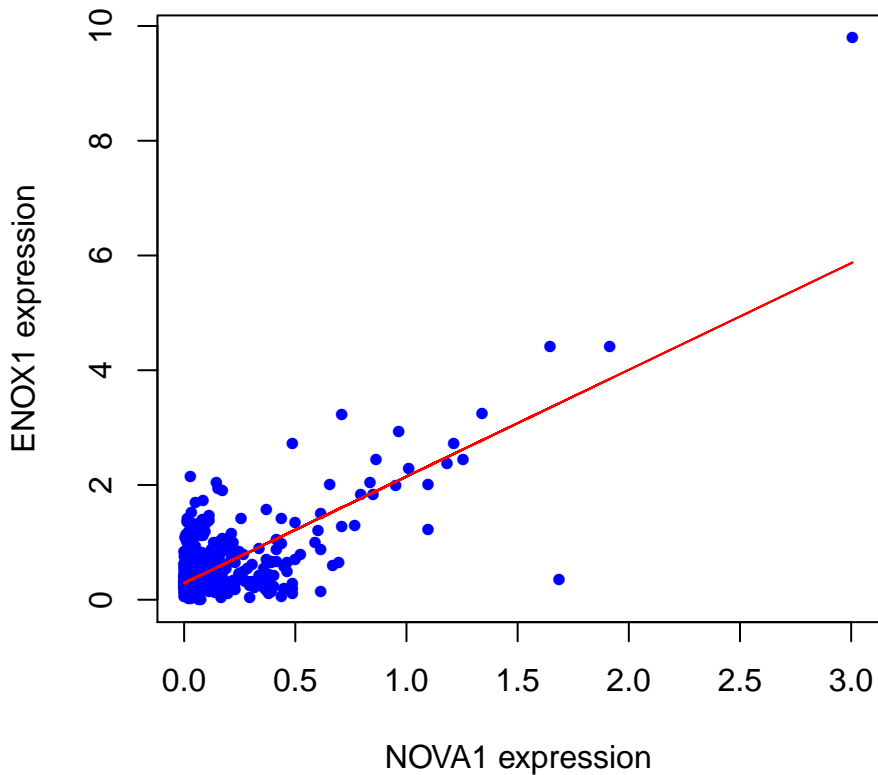

Supplement: raw_data.zip [file raw_data.zip]

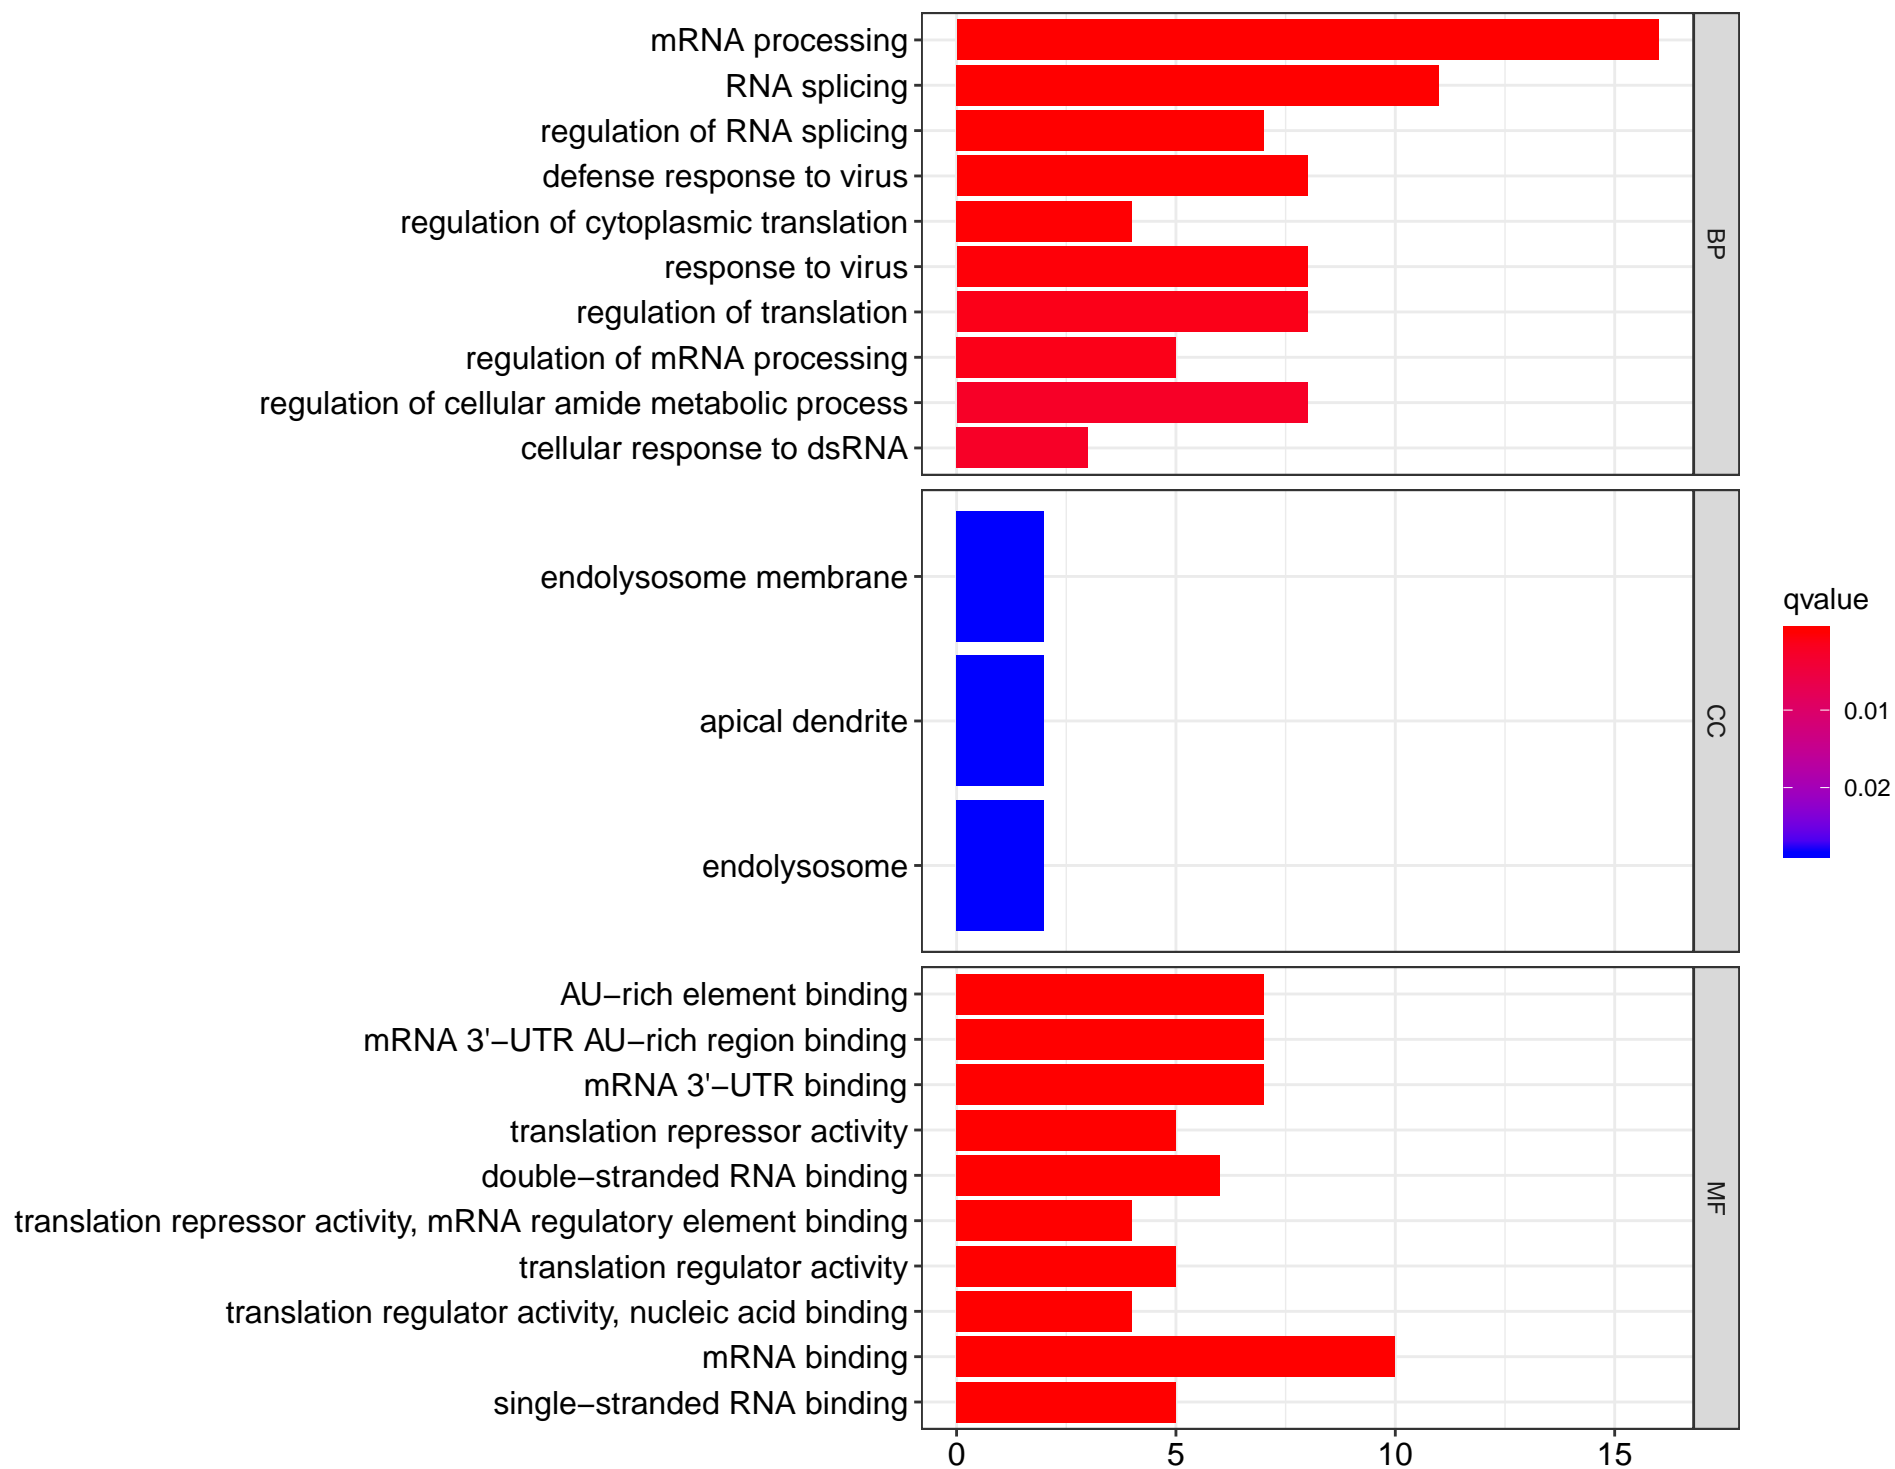

Supplement: raw_data.zip [file raw_data.zip]

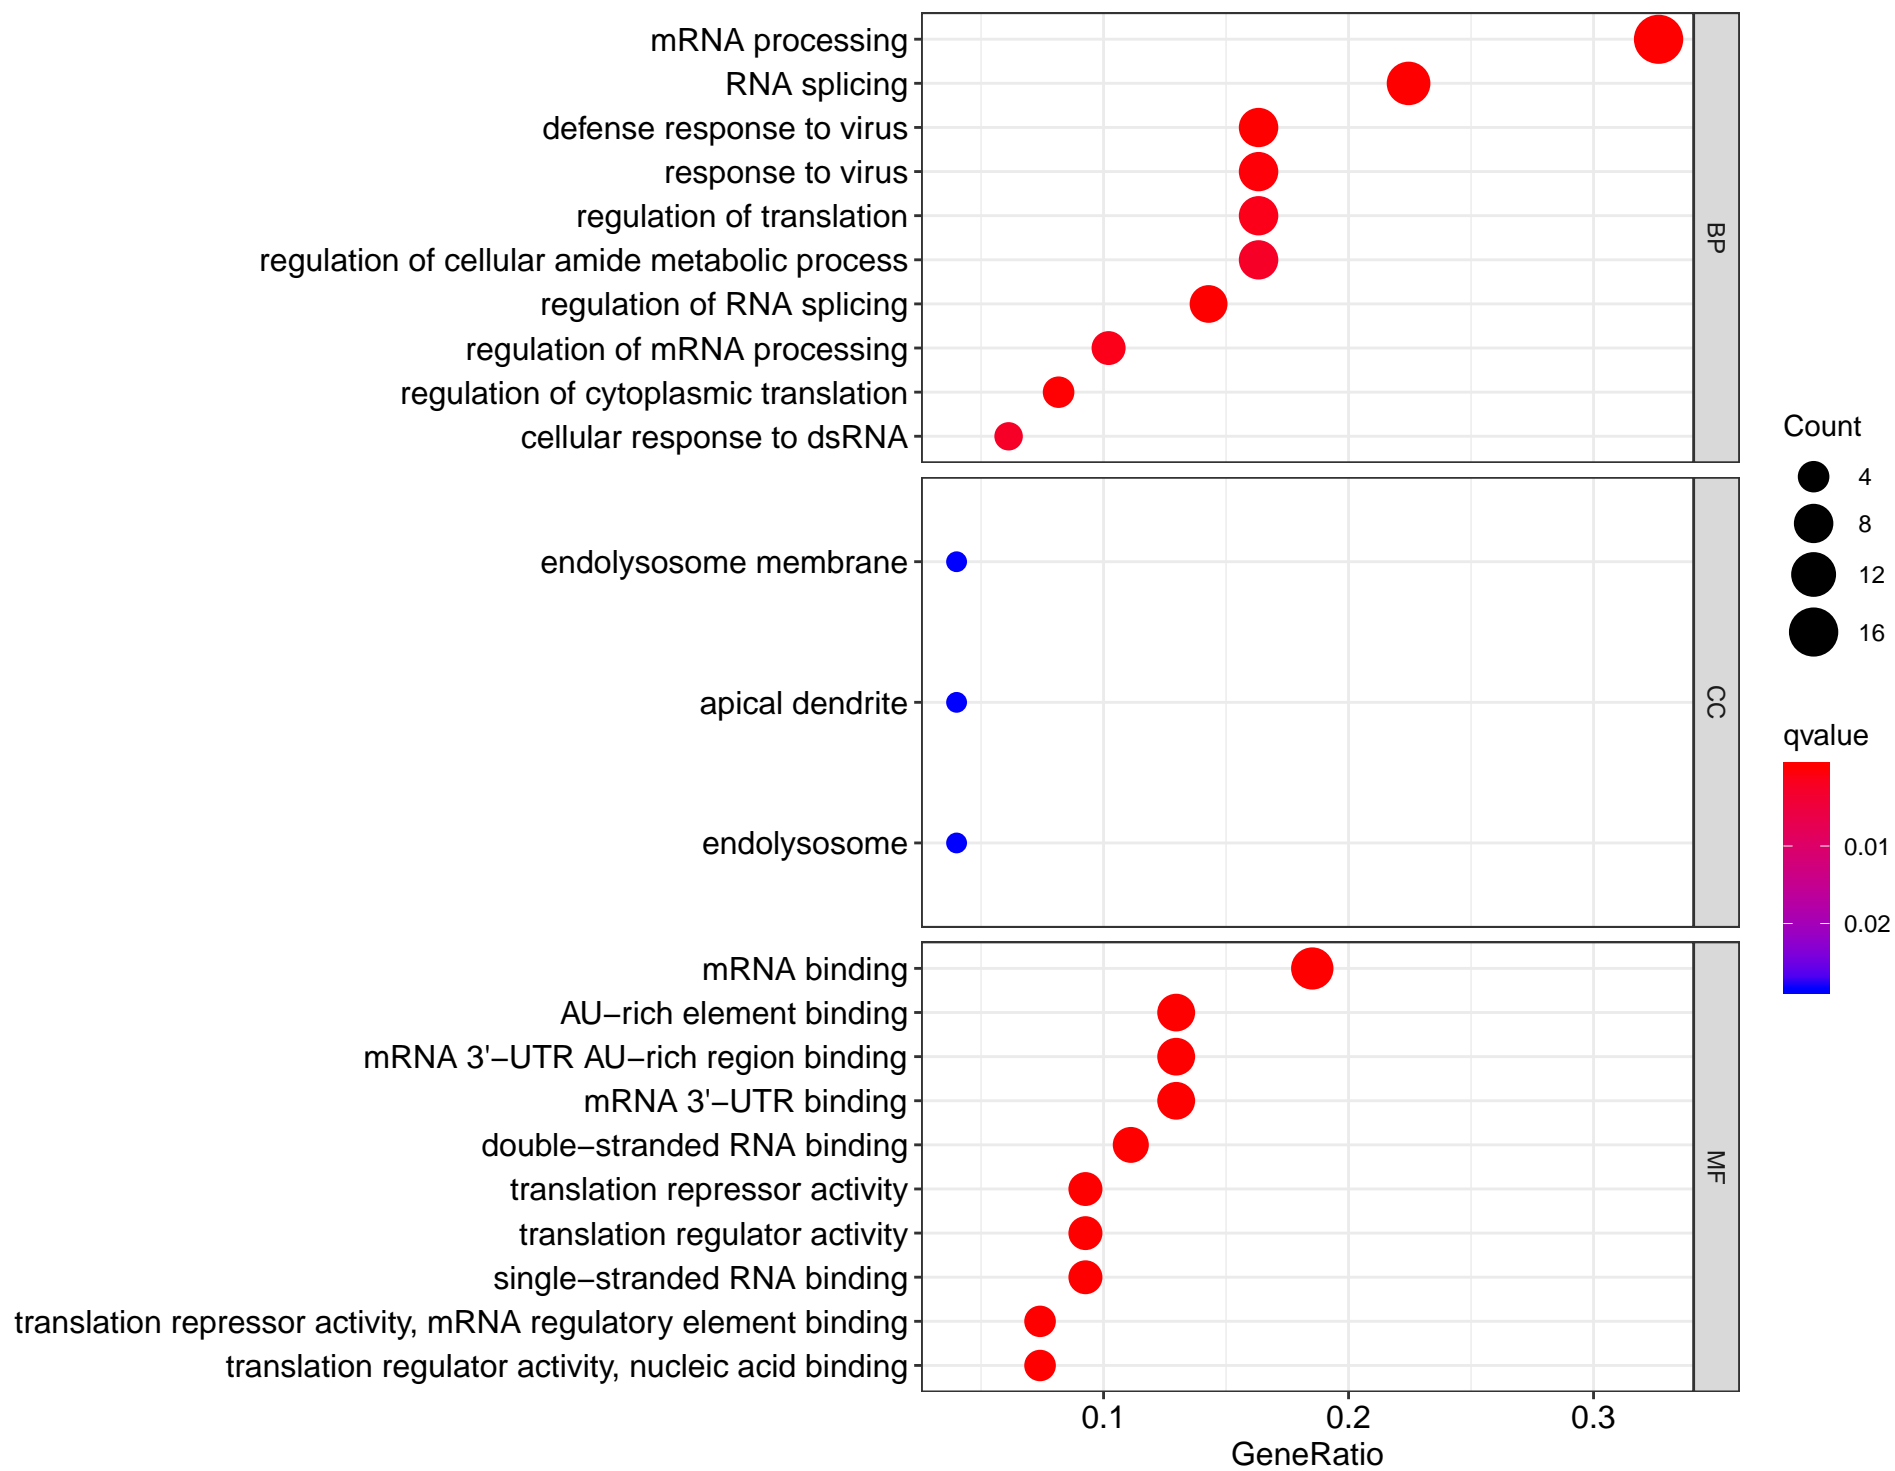

Supplement: raw_data.zip [file raw_data.zip]

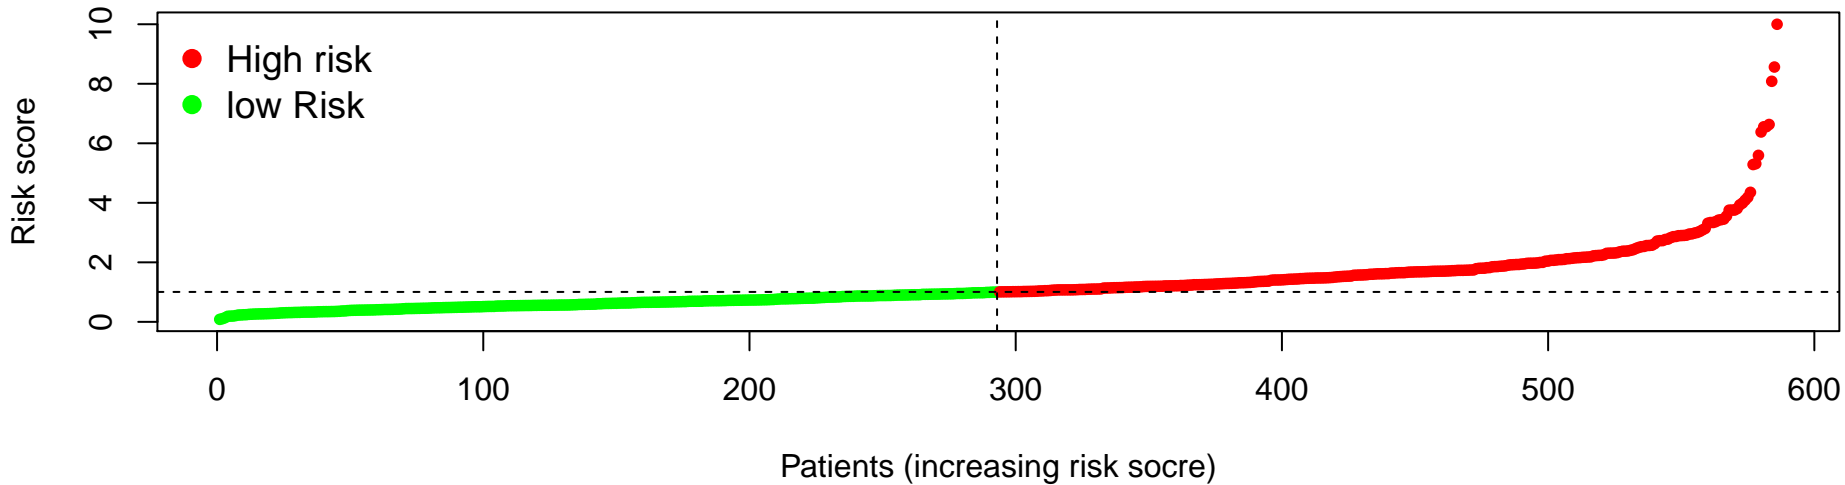

Supplement: raw_data.zip [file raw_data.zip]

**Cor=0.702 (p=1.192e-103)**

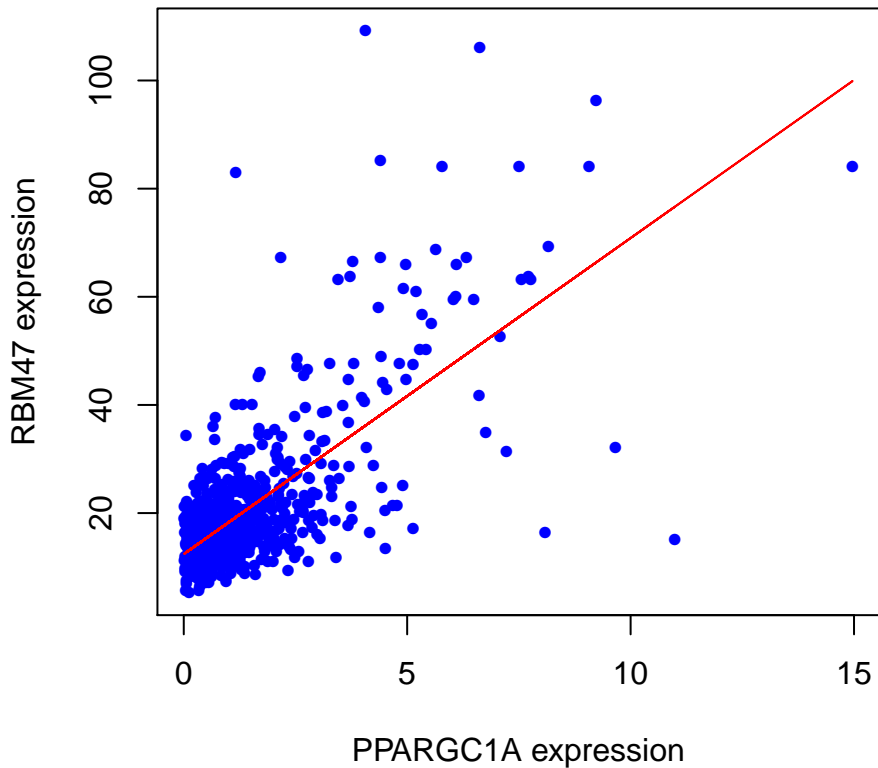

Supplement: raw_data.zip [file raw_data.zip]

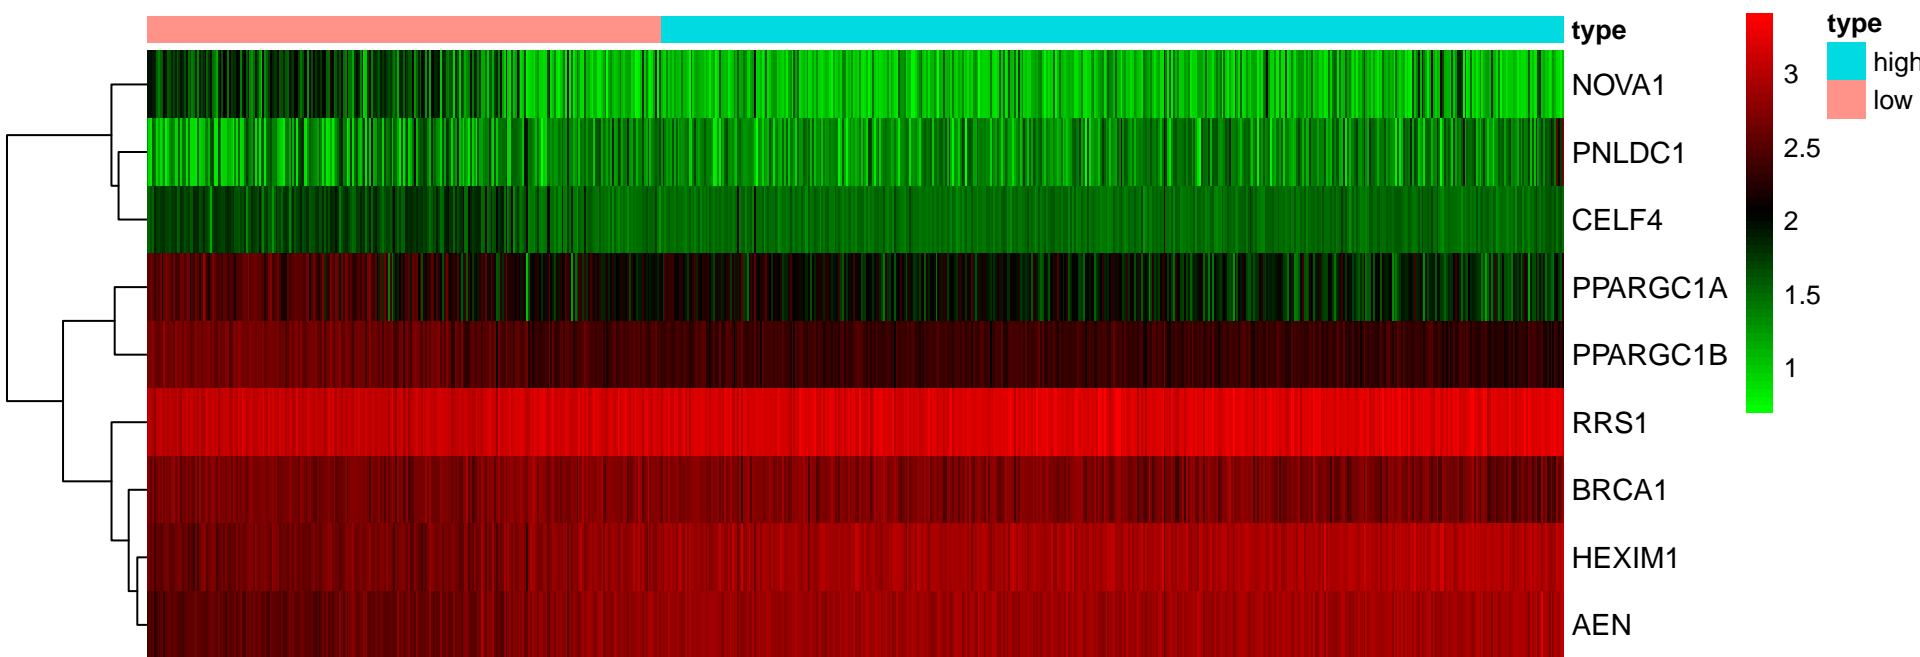

Supplement: raw_data.zip [file raw_data.zip]

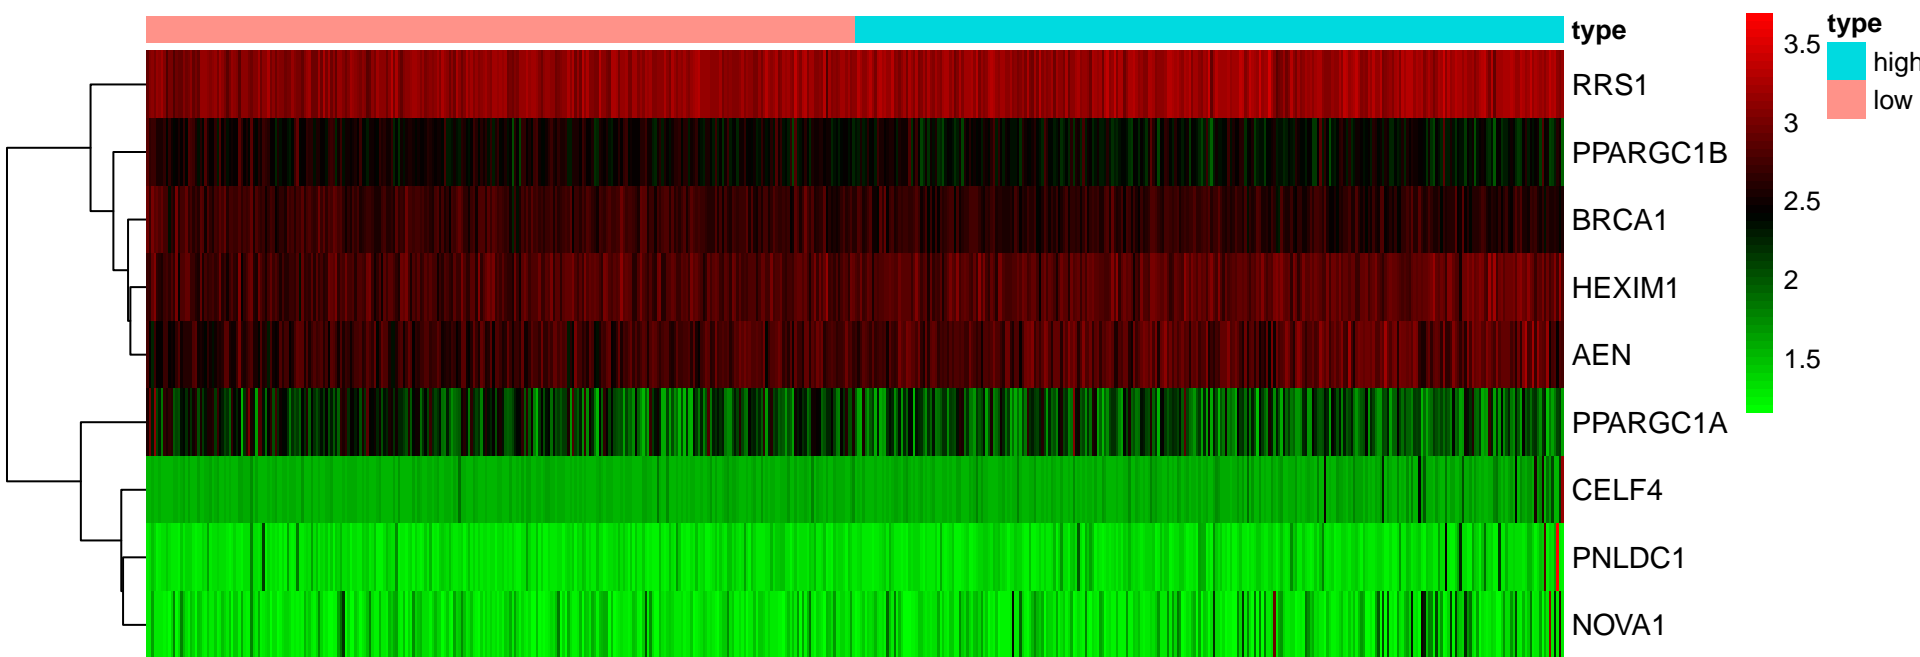

Supplement: raw_data.zip [file raw_data.zip]

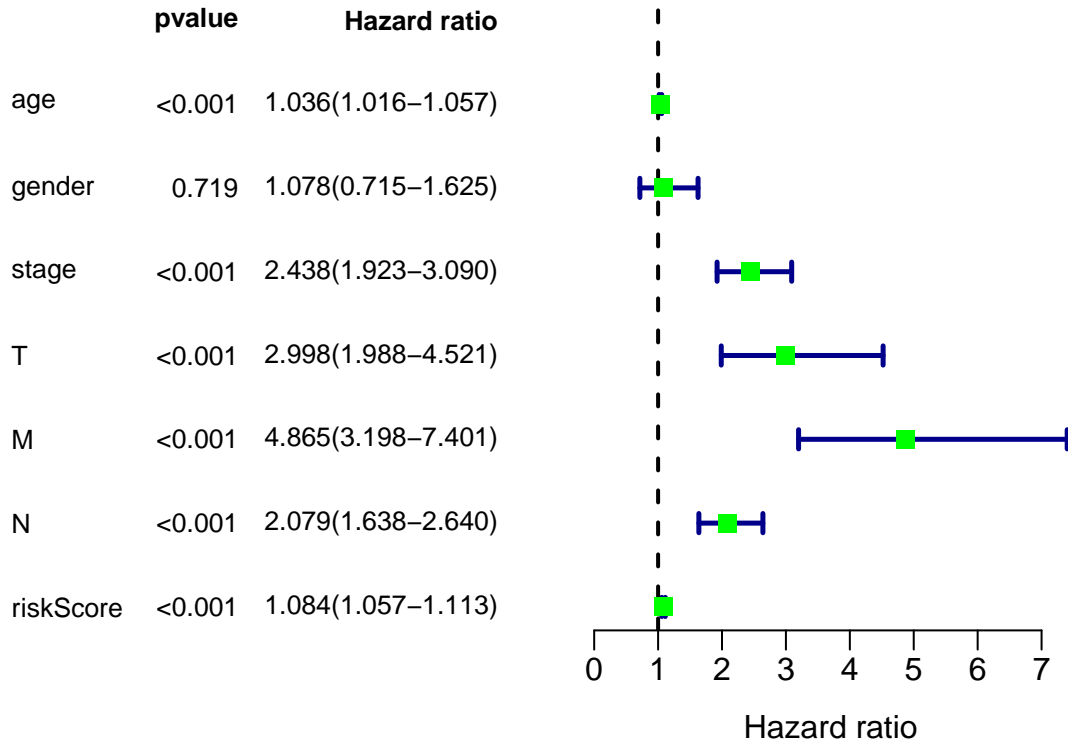

Supplement: raw_data.zip [file raw_data.zip]

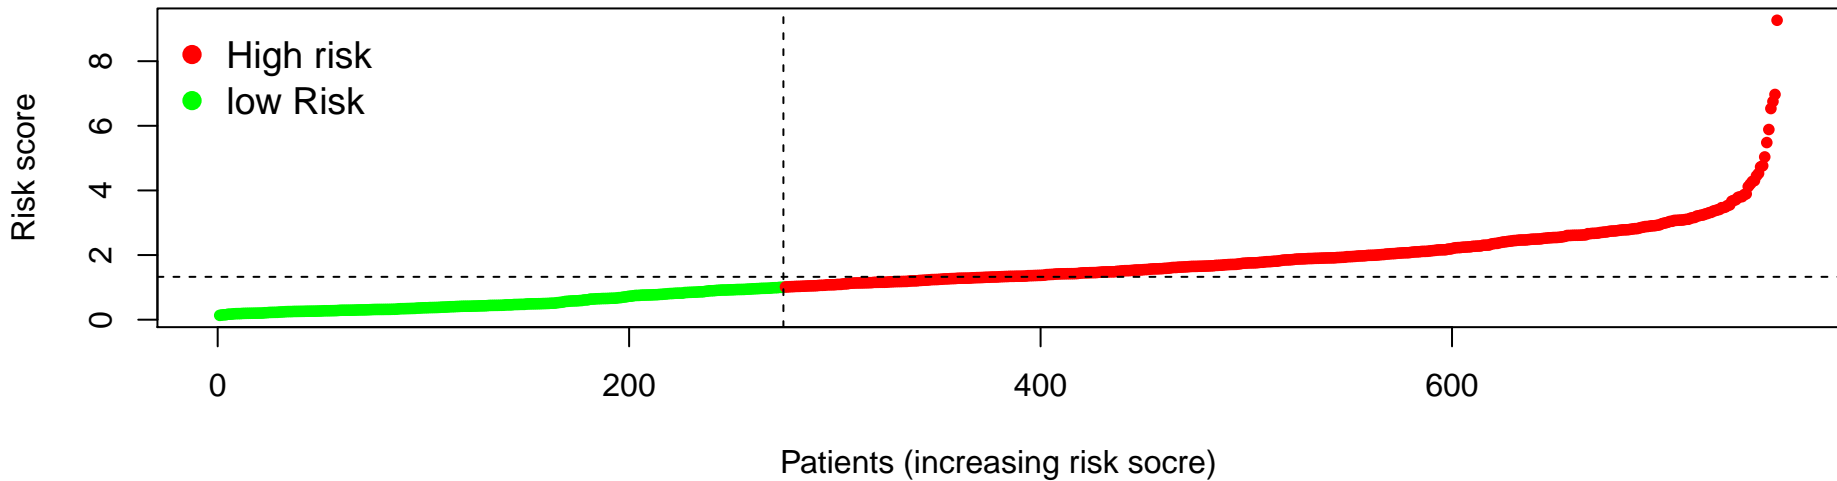

Supplement: raw_data.zip [file raw_data.zip]

**Cor=0.711 (p=9.816e-108)**

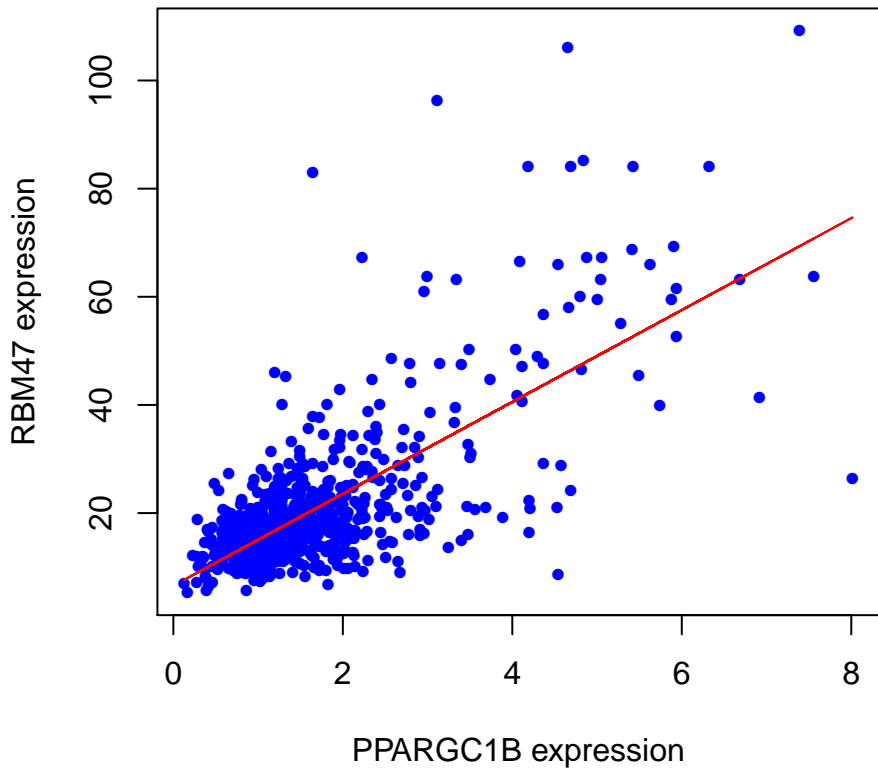

Supplement: raw_data.zip [file raw_data.zip]

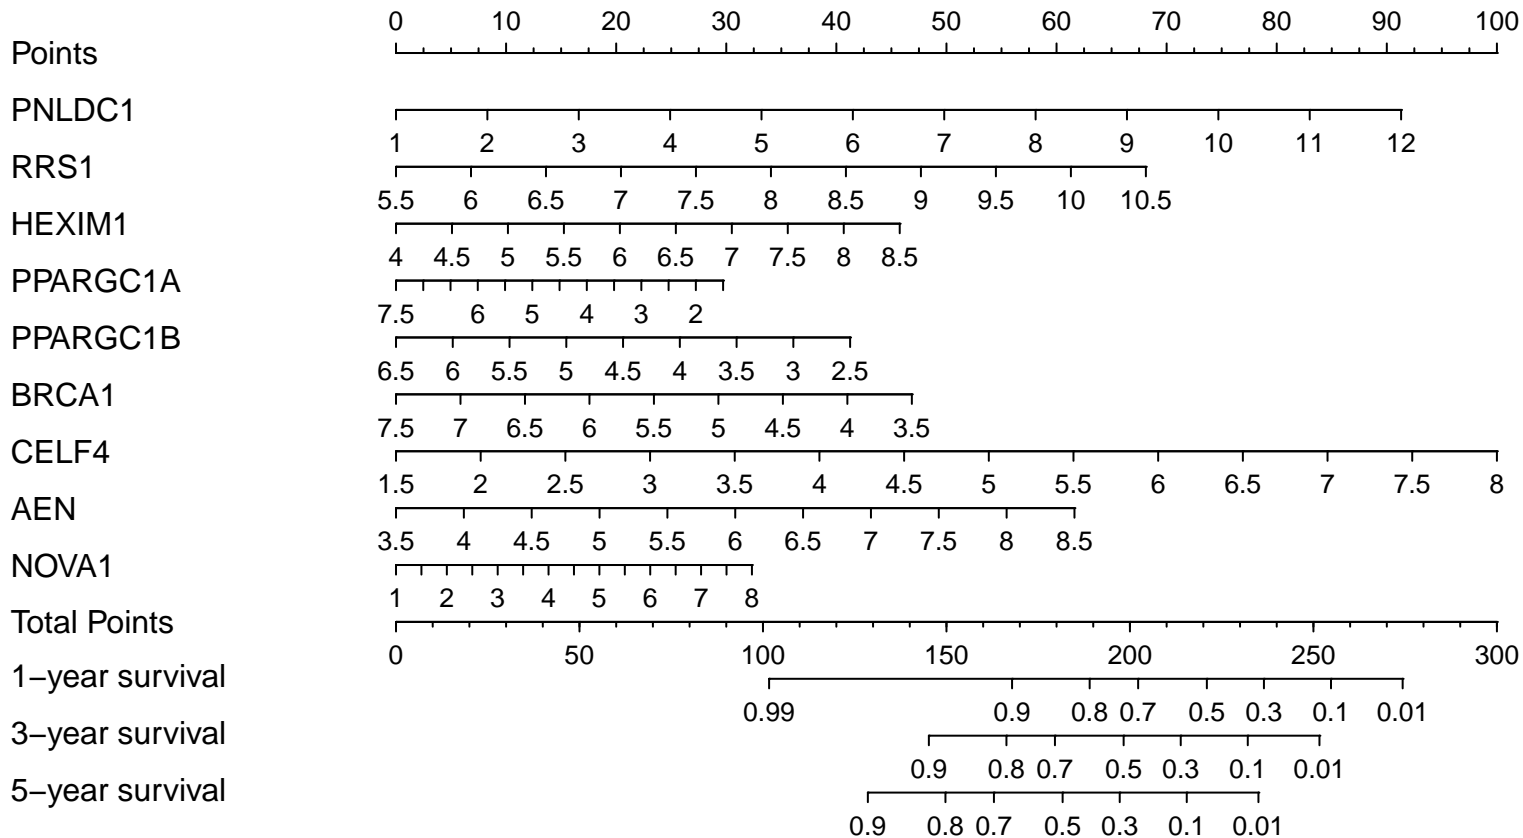

Supplement: raw_data.zip [file raw_data.zip]

**ROC curve ( AUC = 0.638 )**

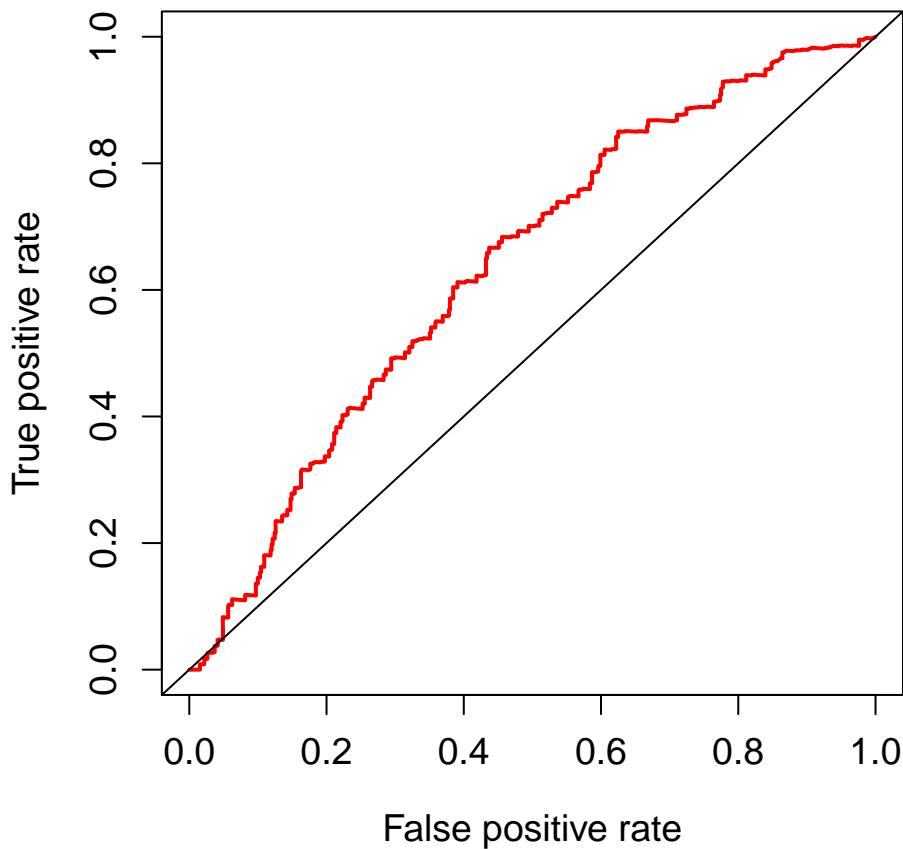

Supplement: raw_data.zip [file raw_data.zip]

**Cor=0.611 (p=4.333e-72)**

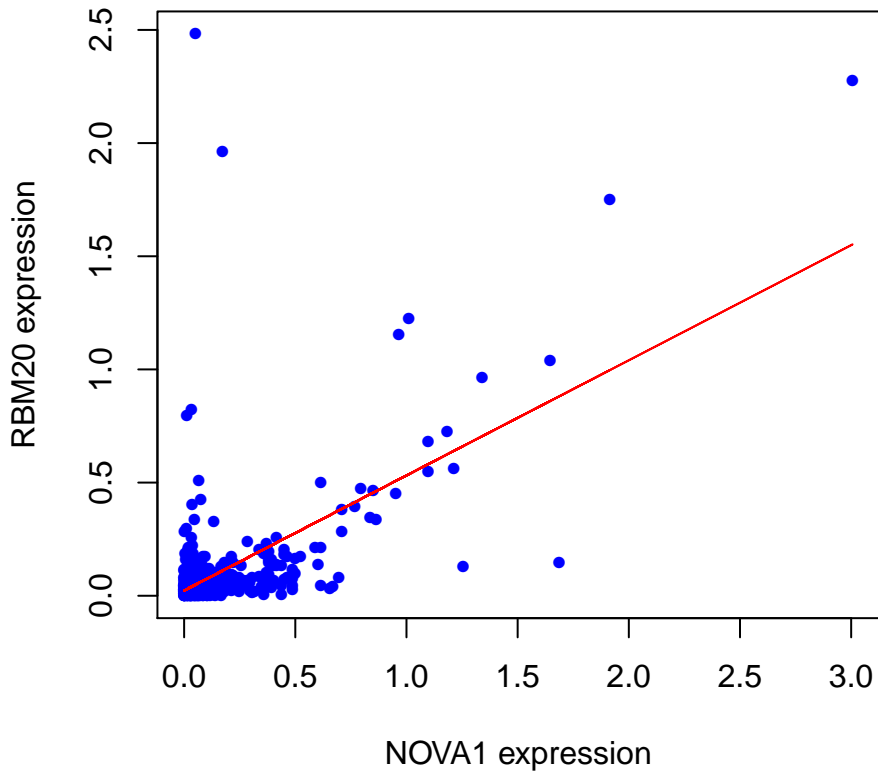

Supplement: raw_data.zip [file raw_data.zip]

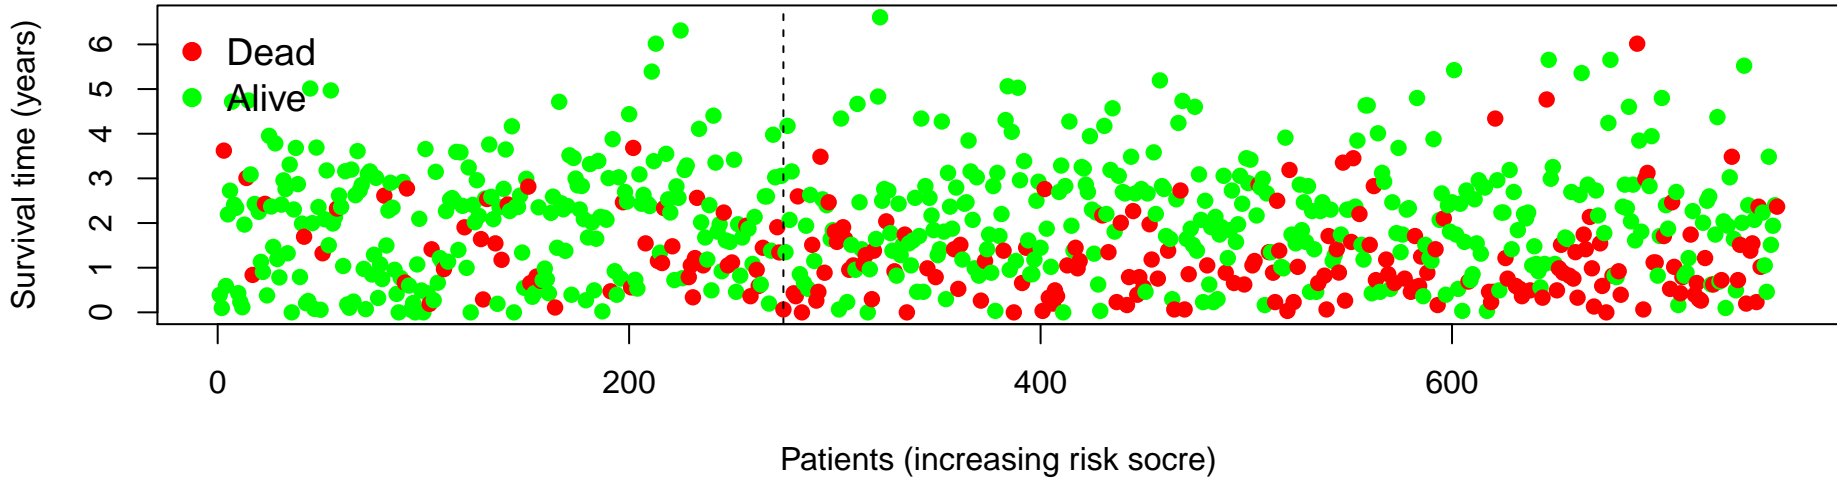

Supplement: raw_data.zip [file raw_data.zip]

**Cor=0.608 (p=4.938e-71)**

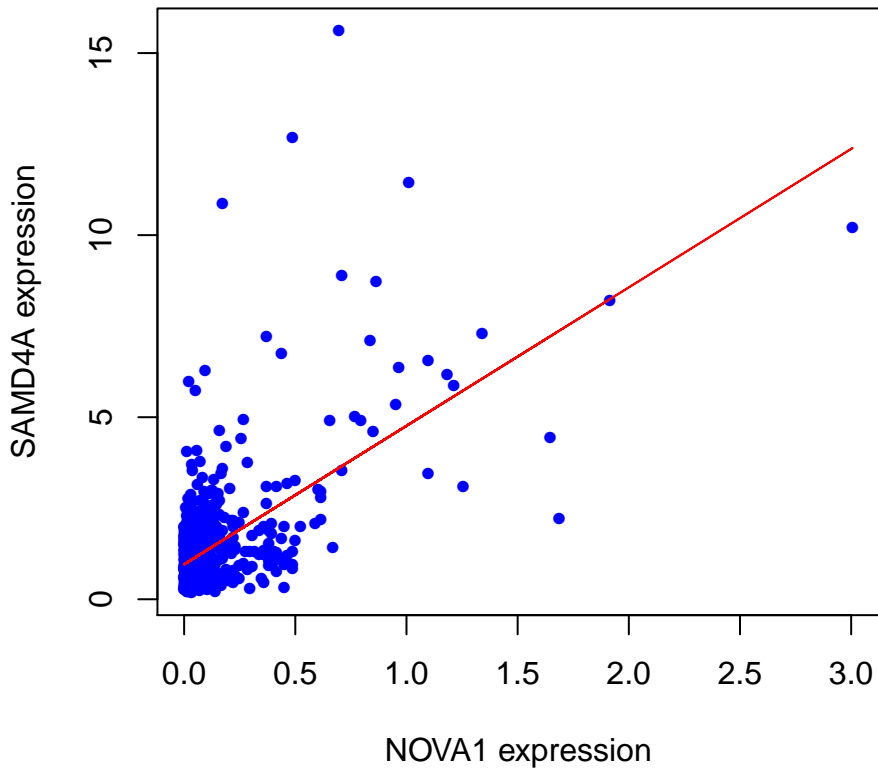

Supplement: raw_data.zip [file raw_data.zip]

**Cor=0.642 (p=9.433e-82)**

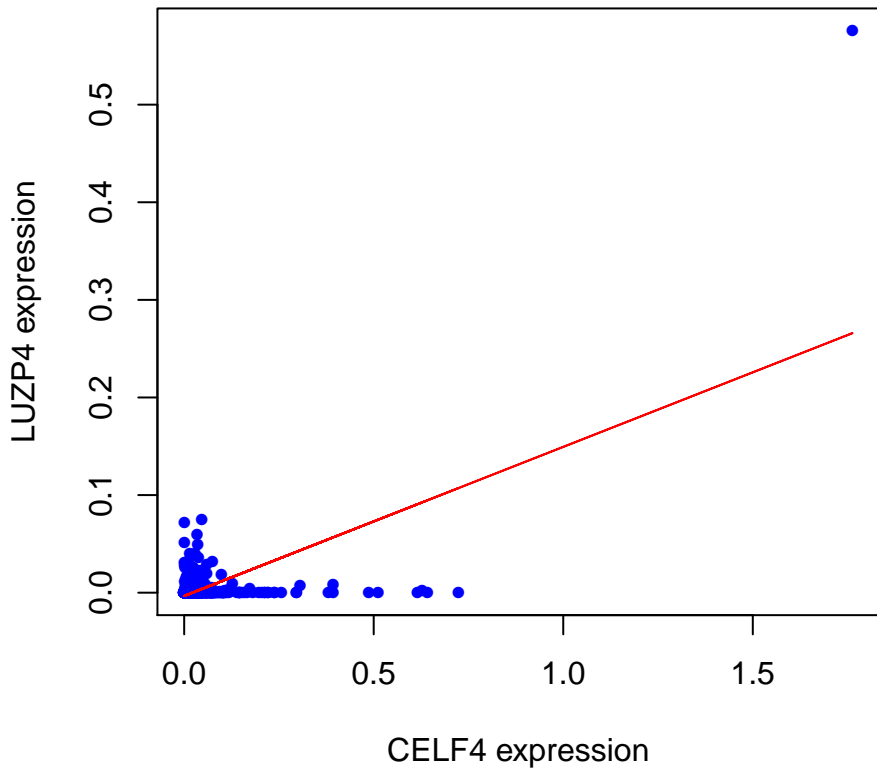

Supplement: raw_data.zip [file raw_data.zip]

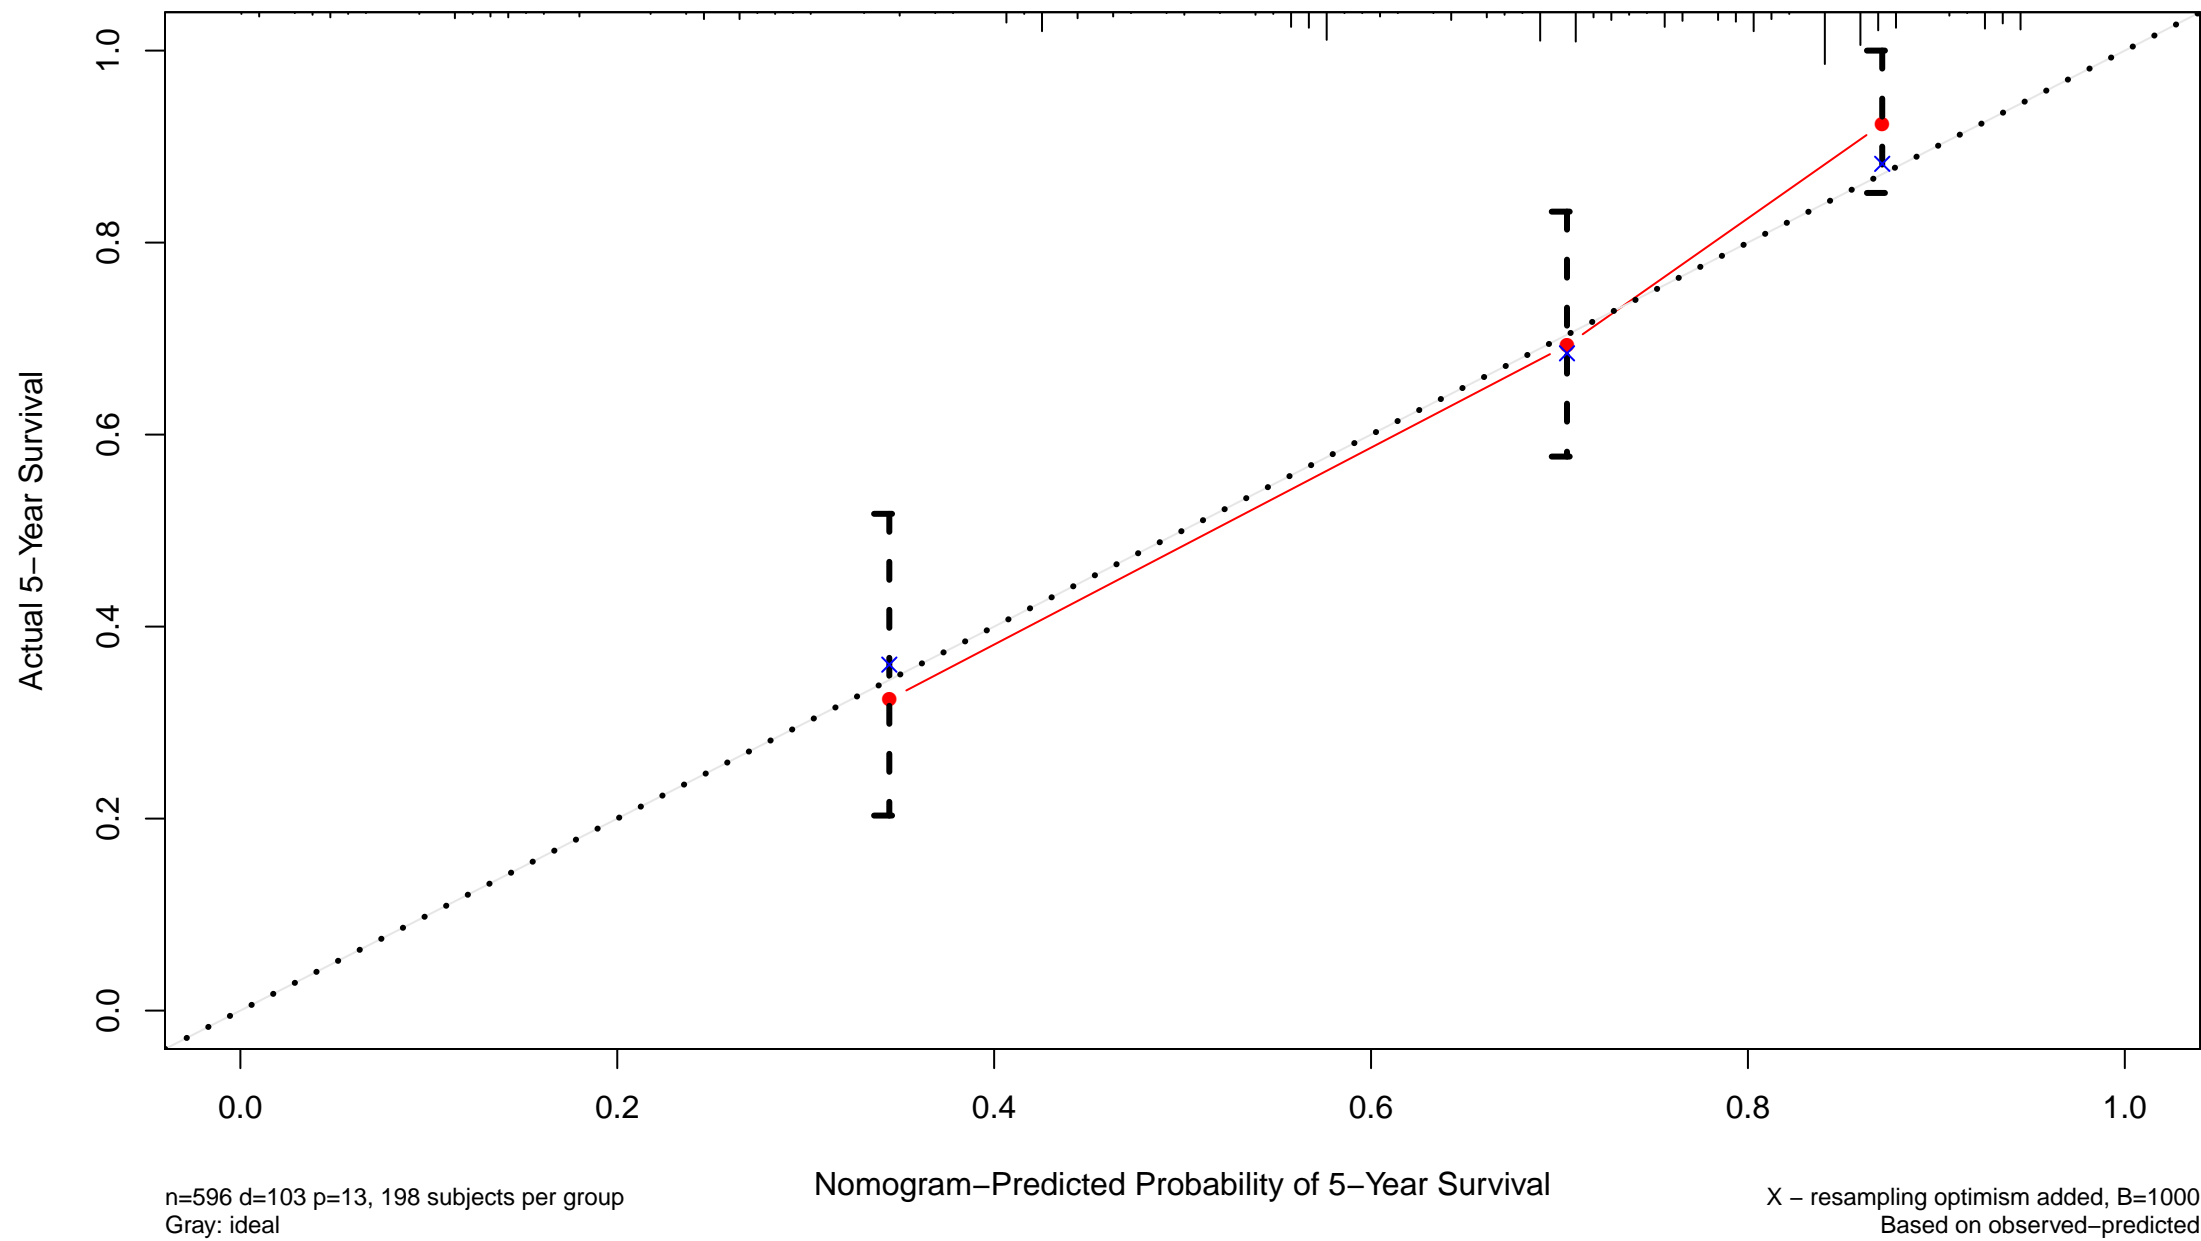

Supplement: raw_data.zip [file raw_data.zip]

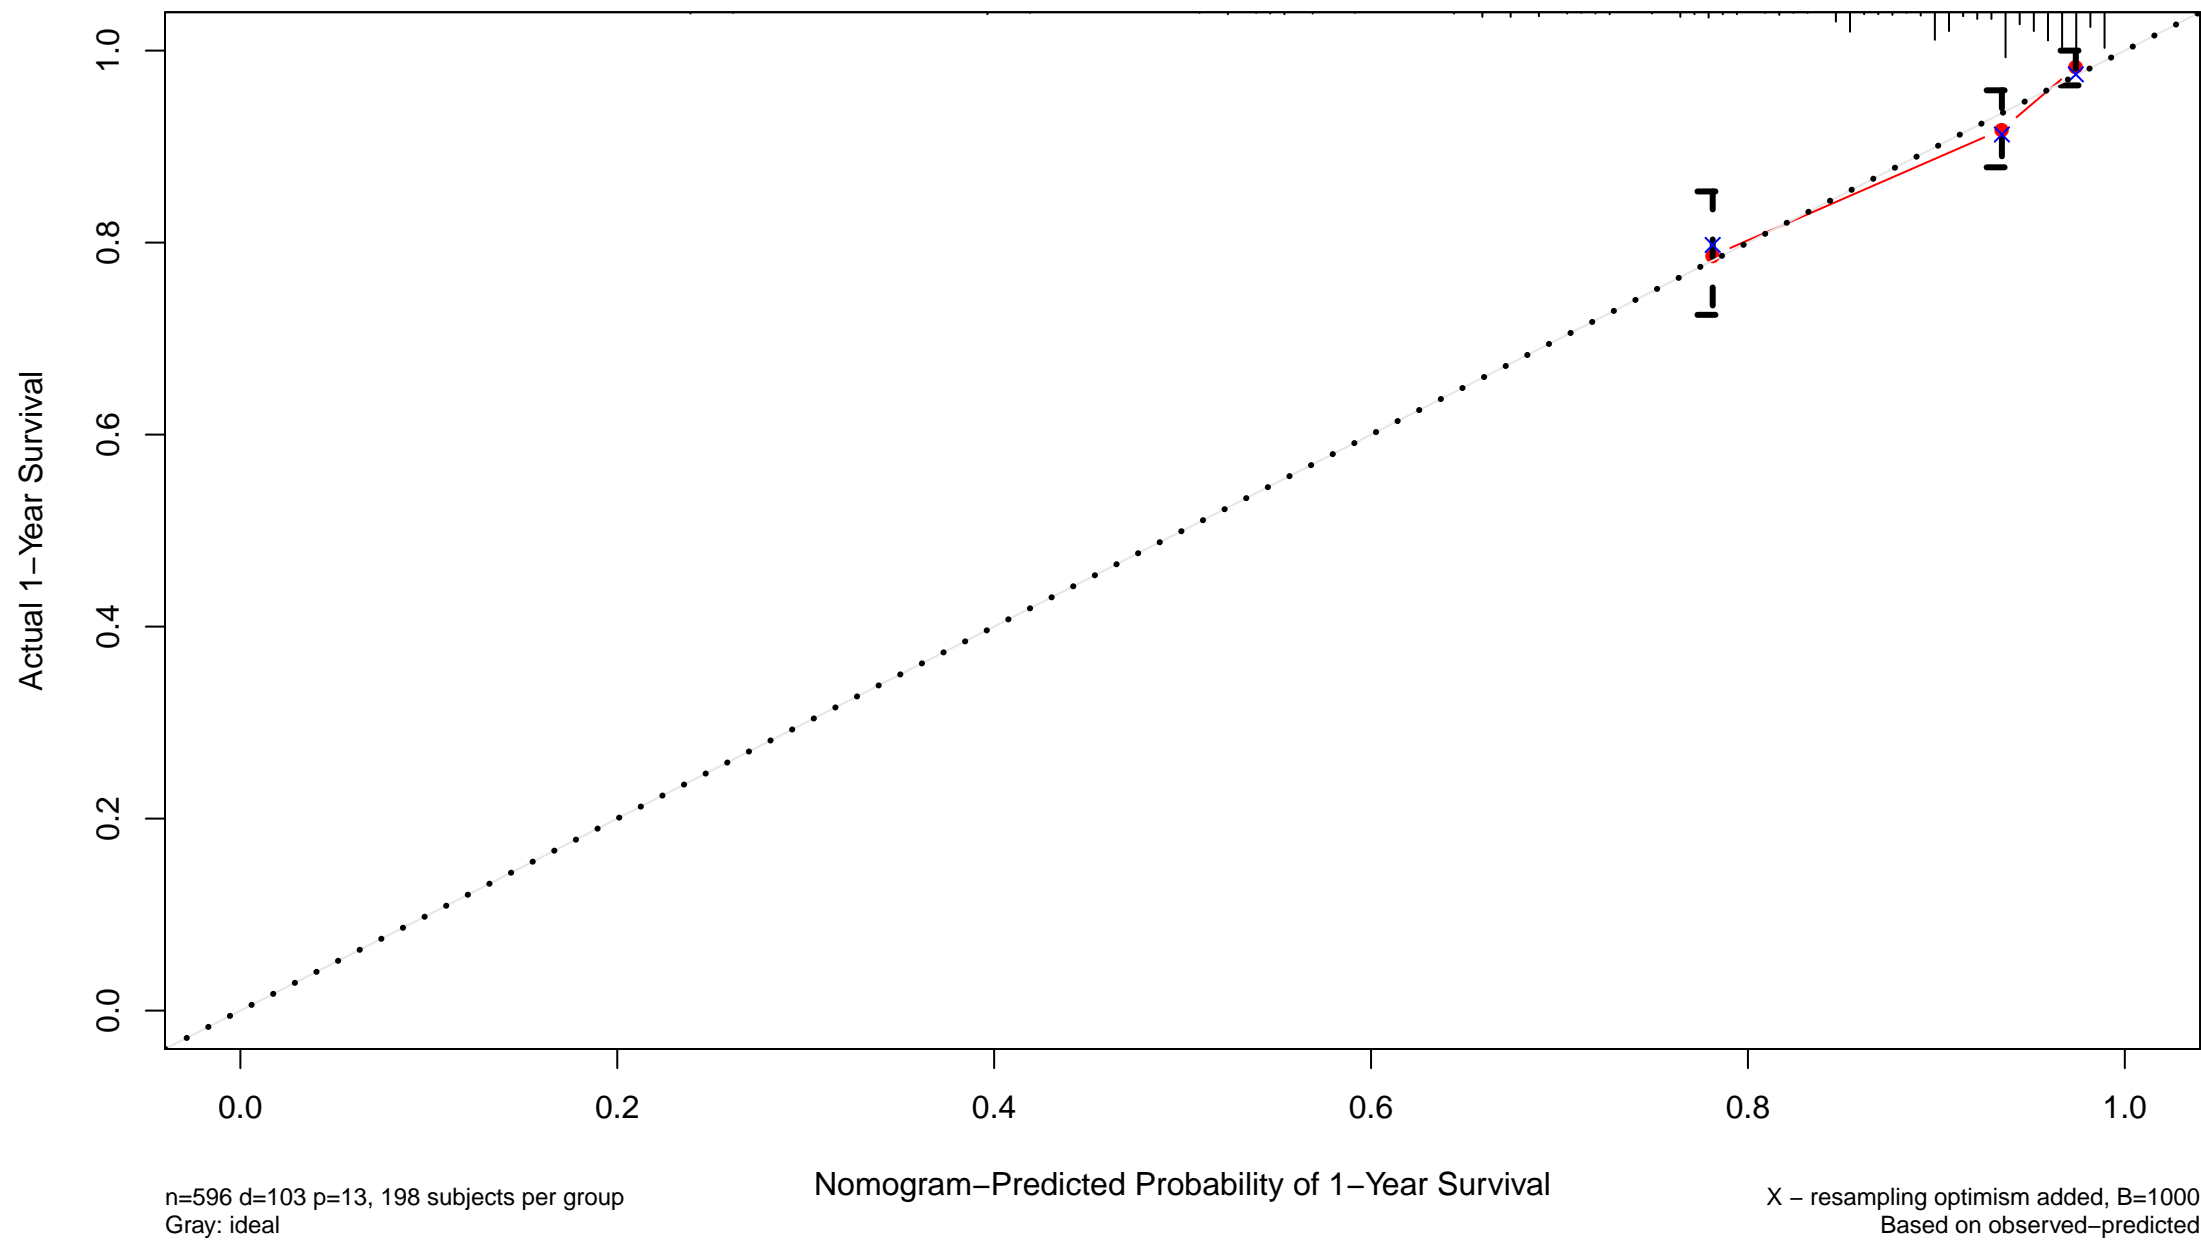

Supplement: raw_data.zip [file raw_data.zip]

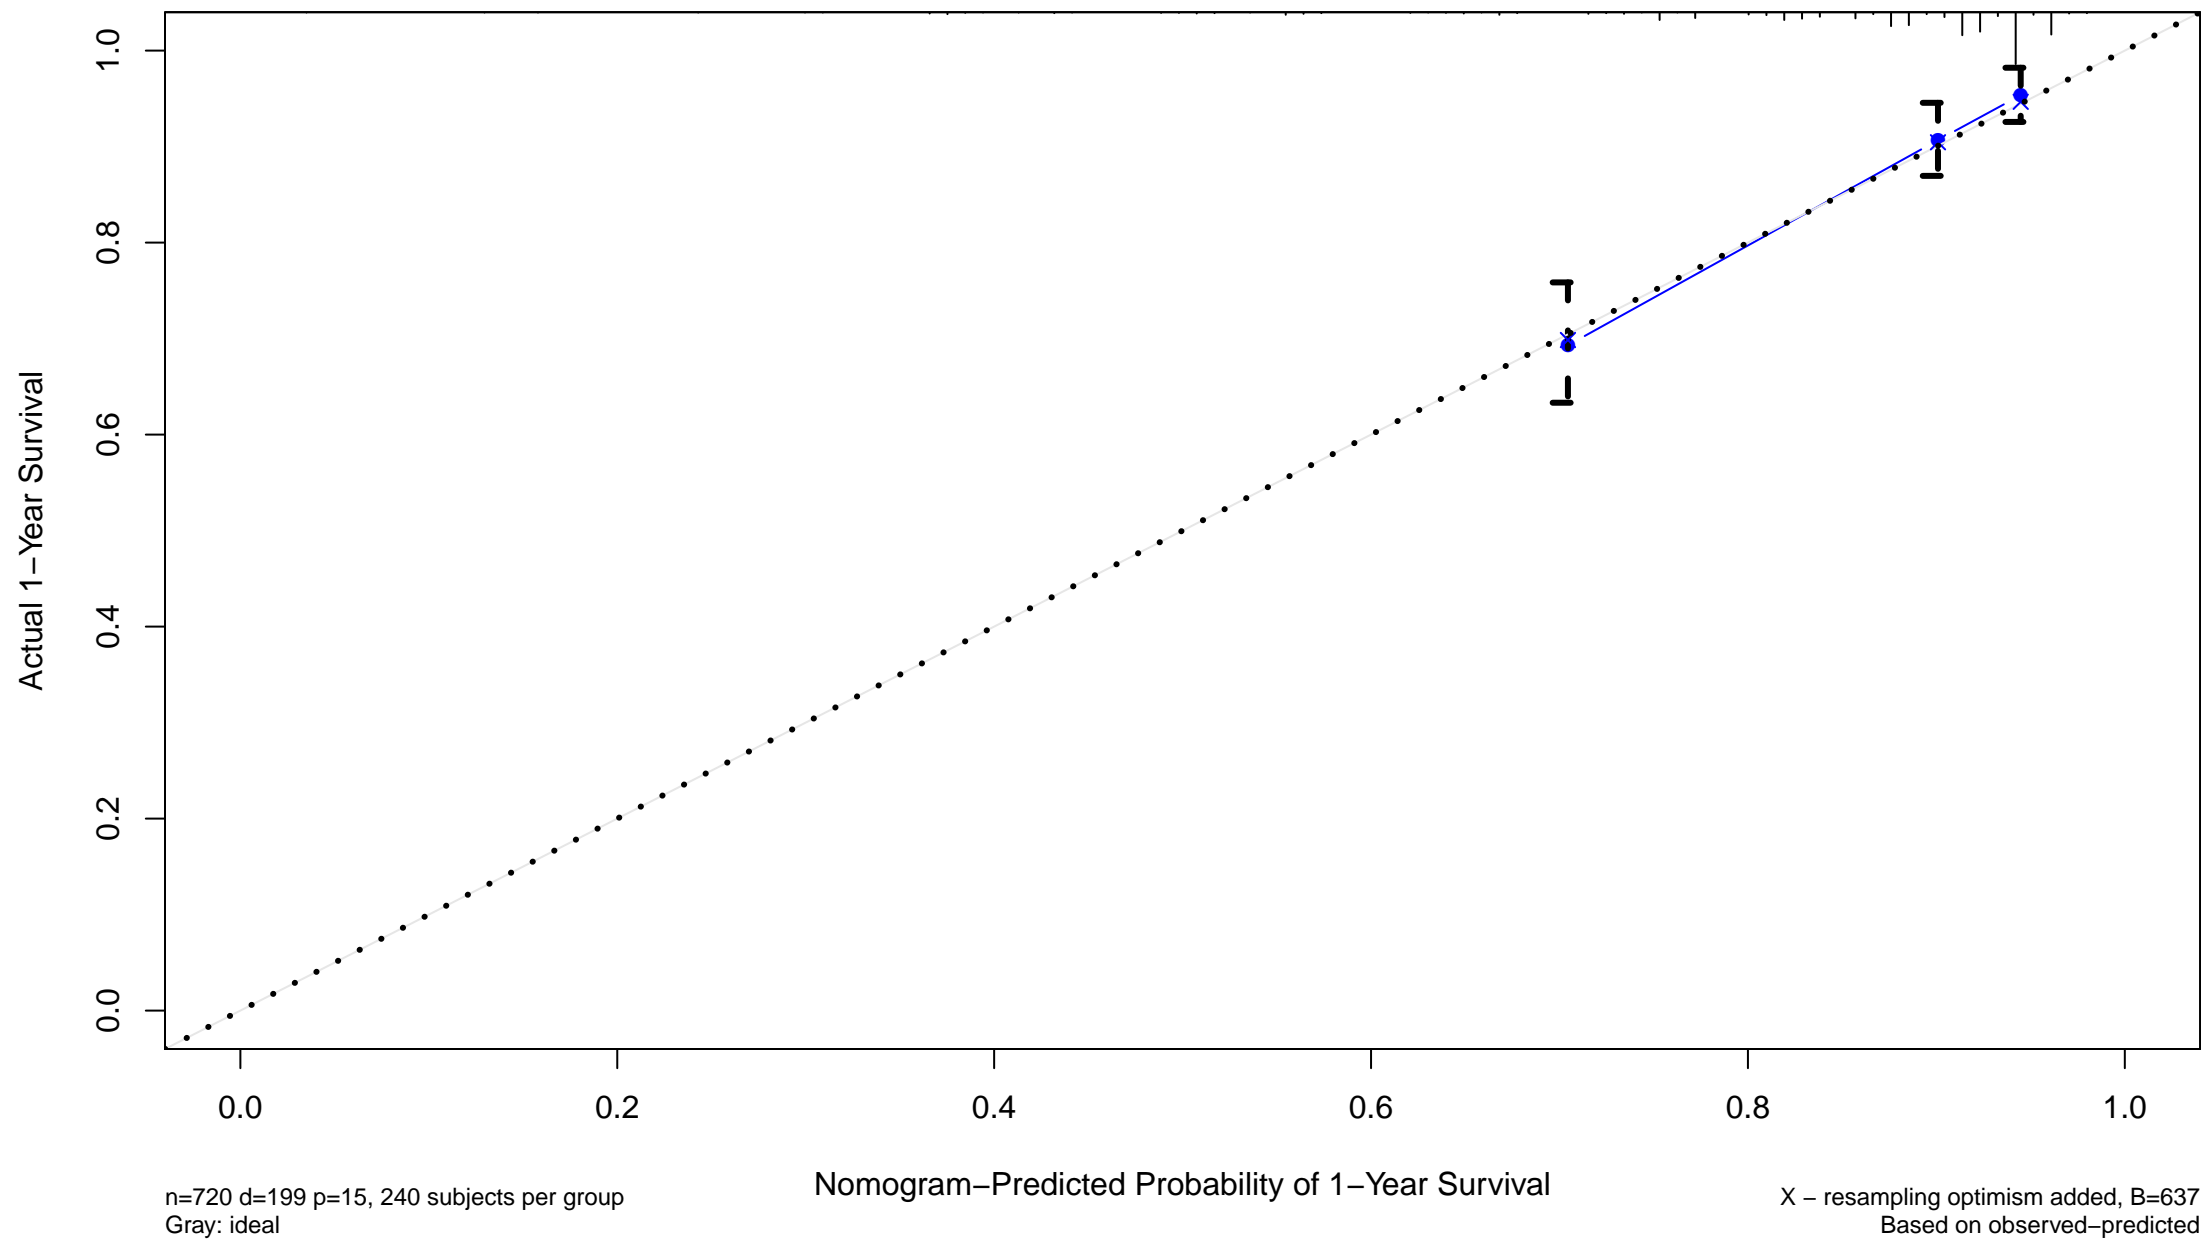

Supplement: raw_data.zip [file raw_data.zip]

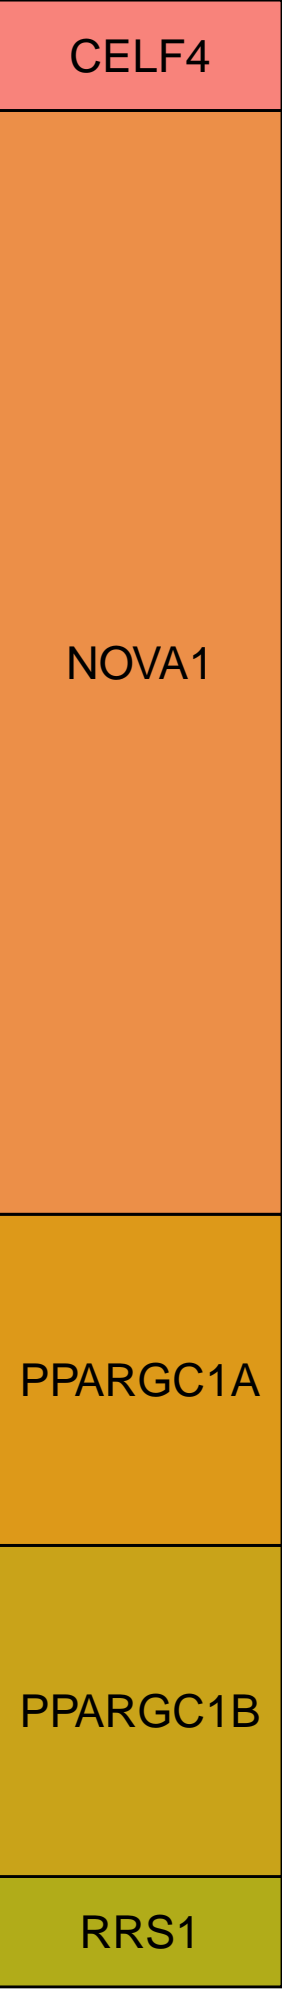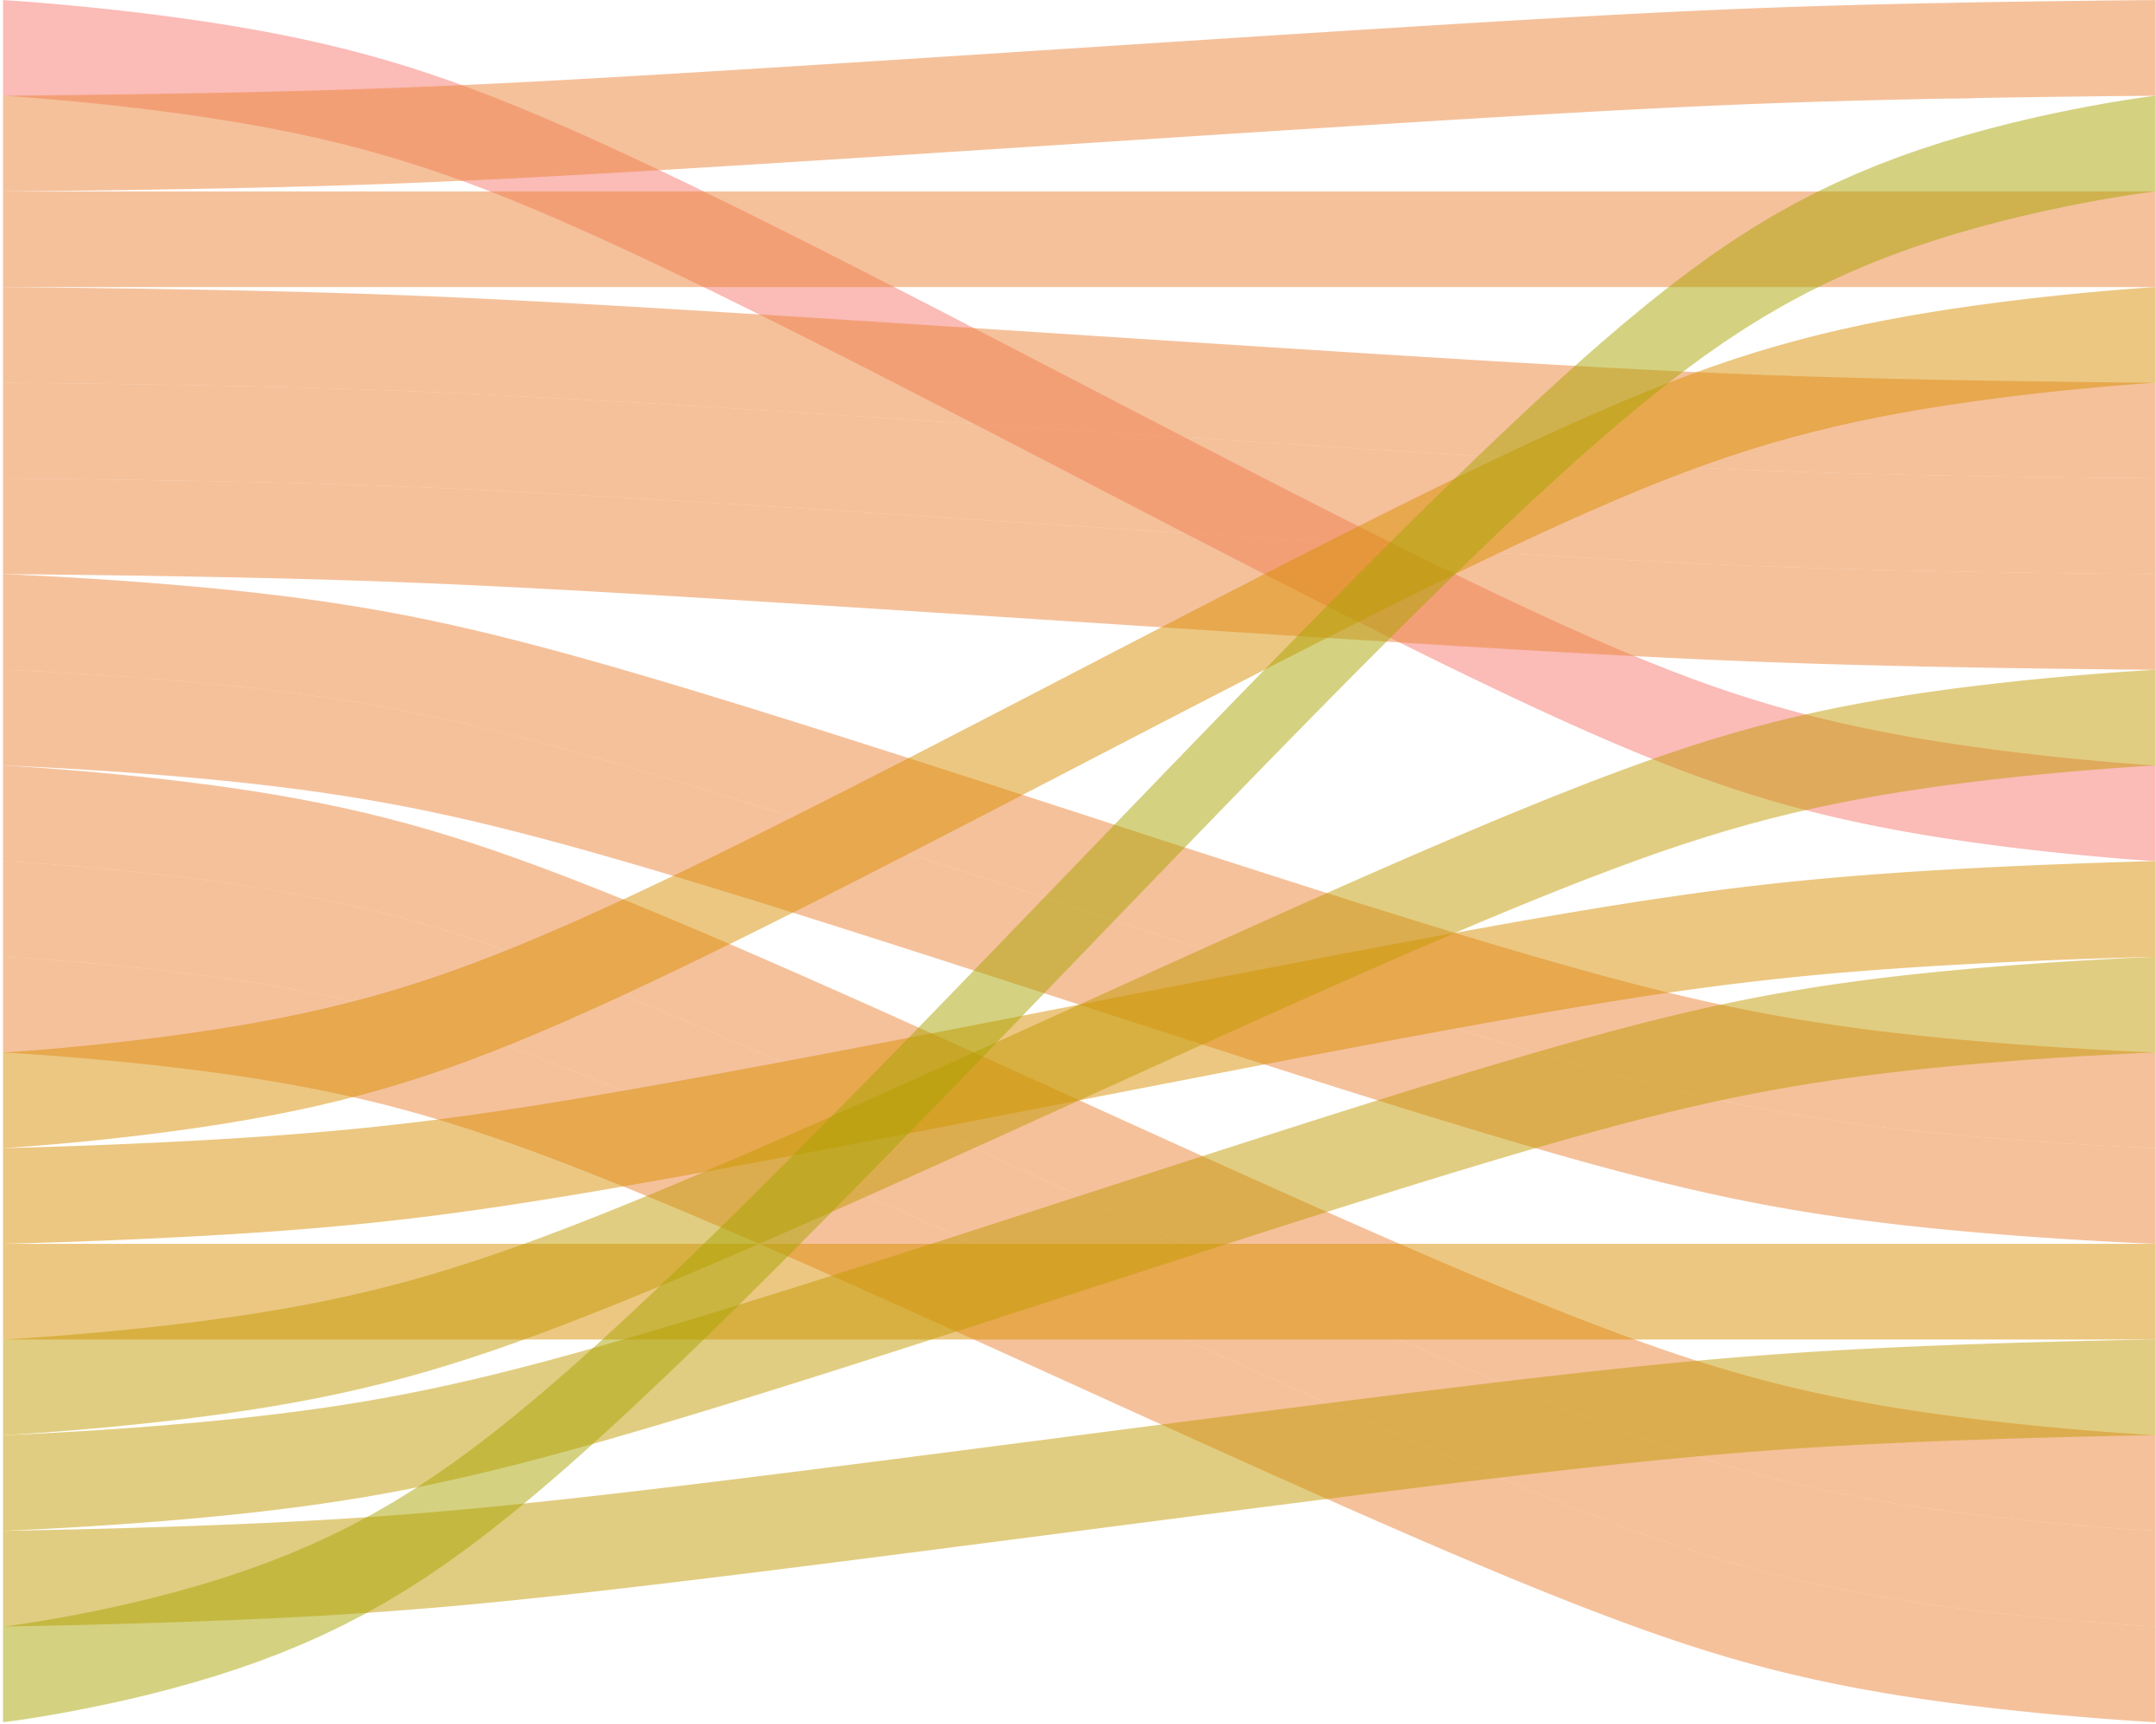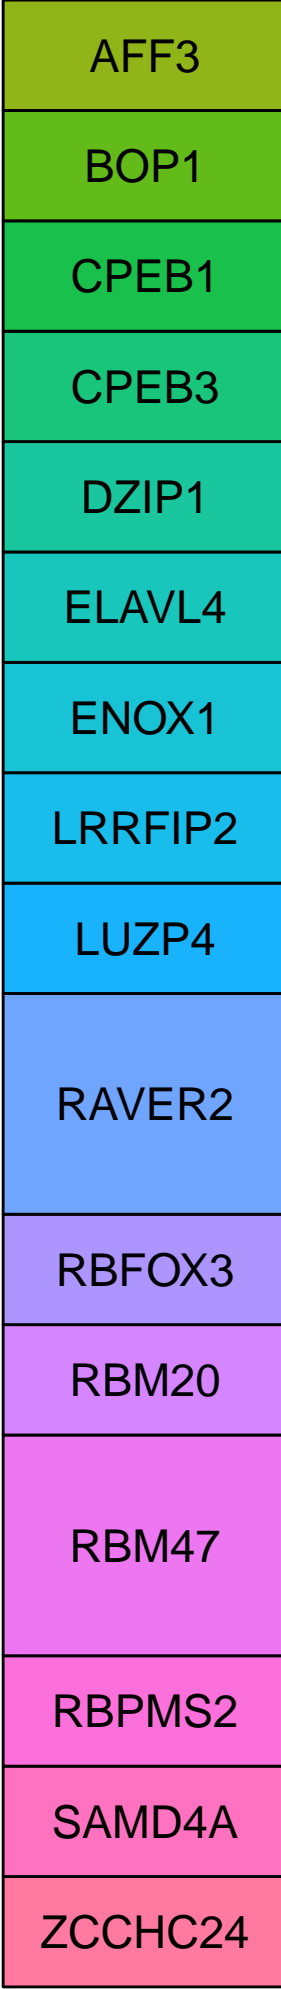

Supplement: raw_data.zip [file raw_data.zip]

|           | <b>pvalue</b> | <b>Hazard ratio</b> |
|-----------|---------------|---------------------|
| age       | <0.001        | 1.053(1.032–1.075)  |
| gender    | 0.462         | 0.855(0.562–1.299)  |
| stage     | 0.099         | 1.765(0.899–3.464)  |
| T         | 0.049         | 1.607(1.002–2.577)  |
| M         | 0.341         | 1.575(0.618–4.012)  |
| N         | 0.501         | 1.152(0.762–1.742)  |
| riskScore | <0.001        | 1.083(1.050–1.117)  |

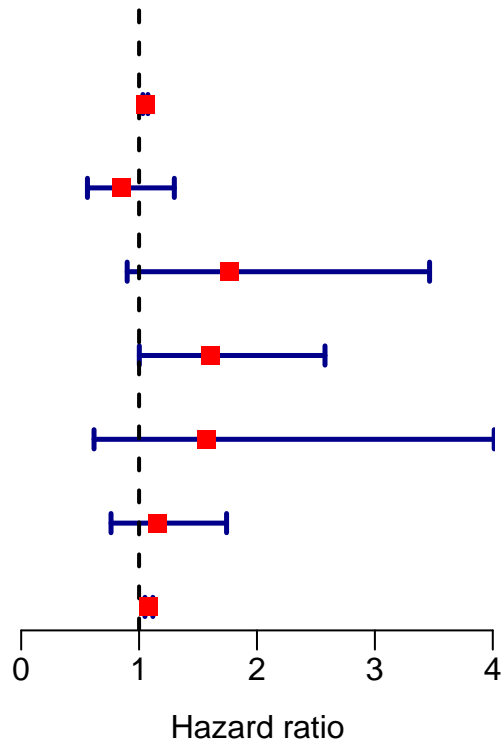

Supplement: raw_data.zip [file raw_data.zip]

# Volcano

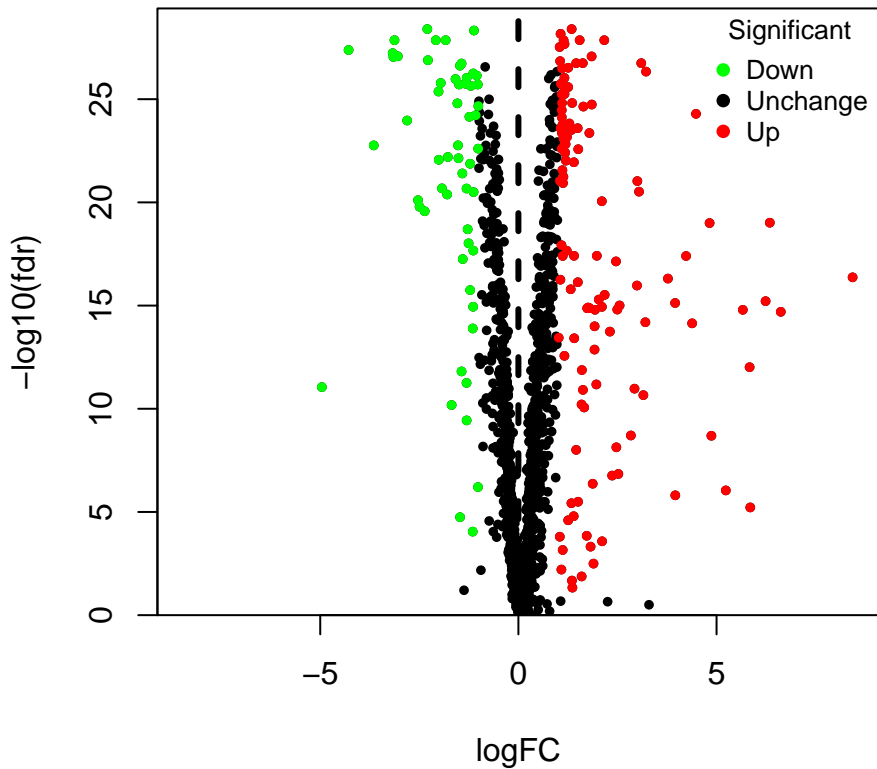

Supplement: raw_data.zip [file raw_data.zip]

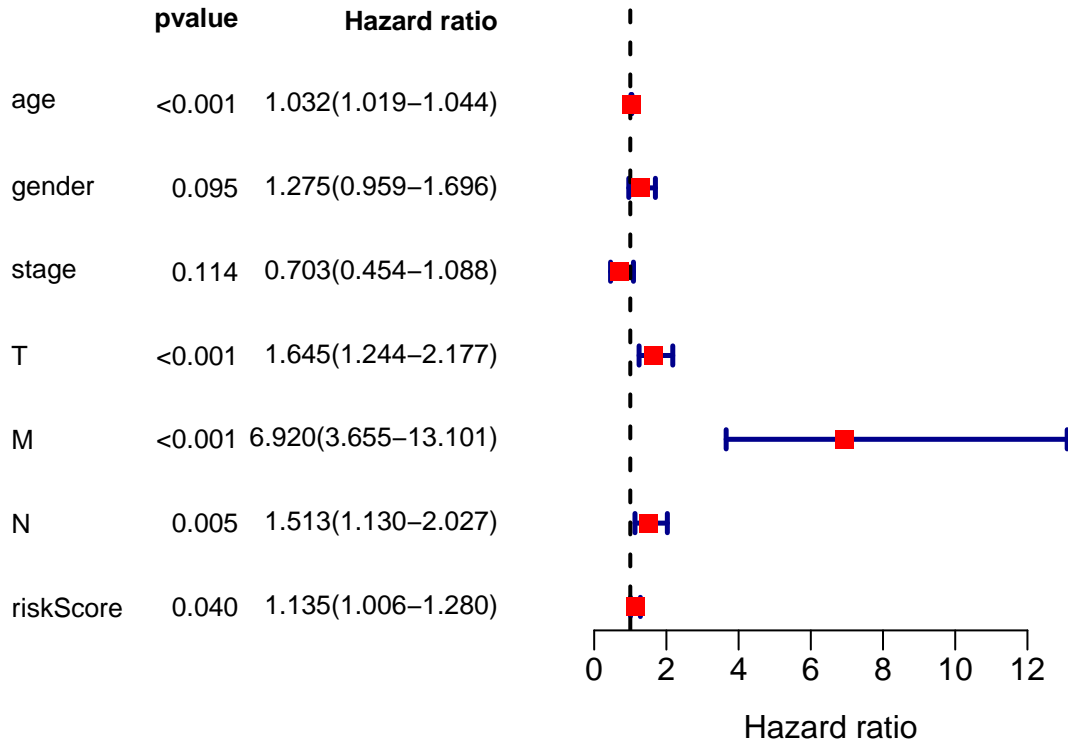

Supplement: raw_data.zip [file raw_data.zip]

**Cor=0.711 (p=7.902e-108)**

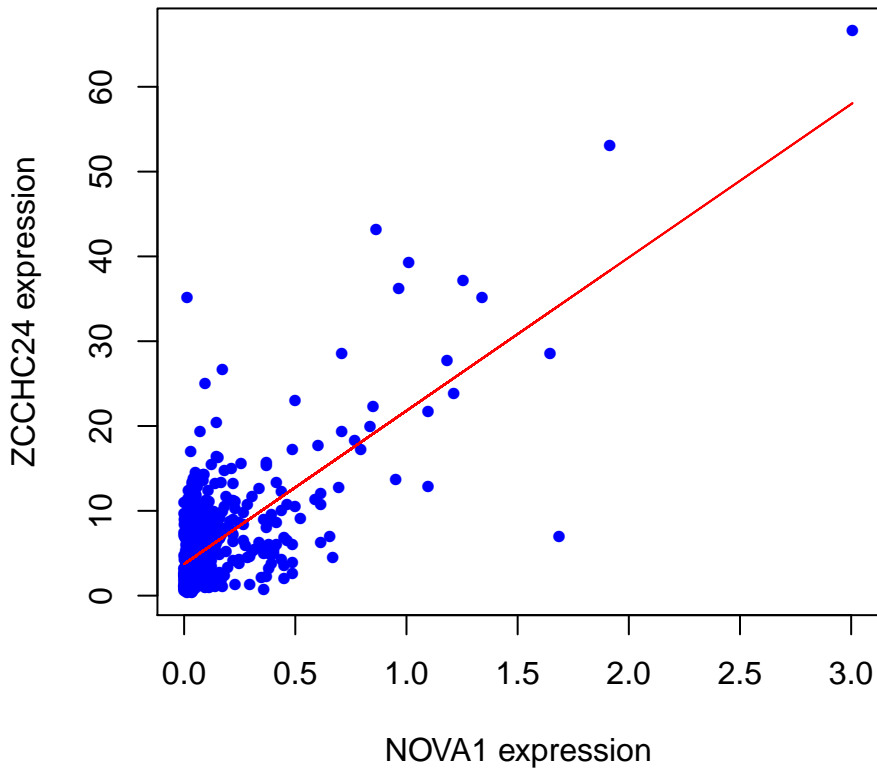

Supplement: raw_data.zip [file raw_data.zip]

**Cor=0.627 (p=8.562e-77)**

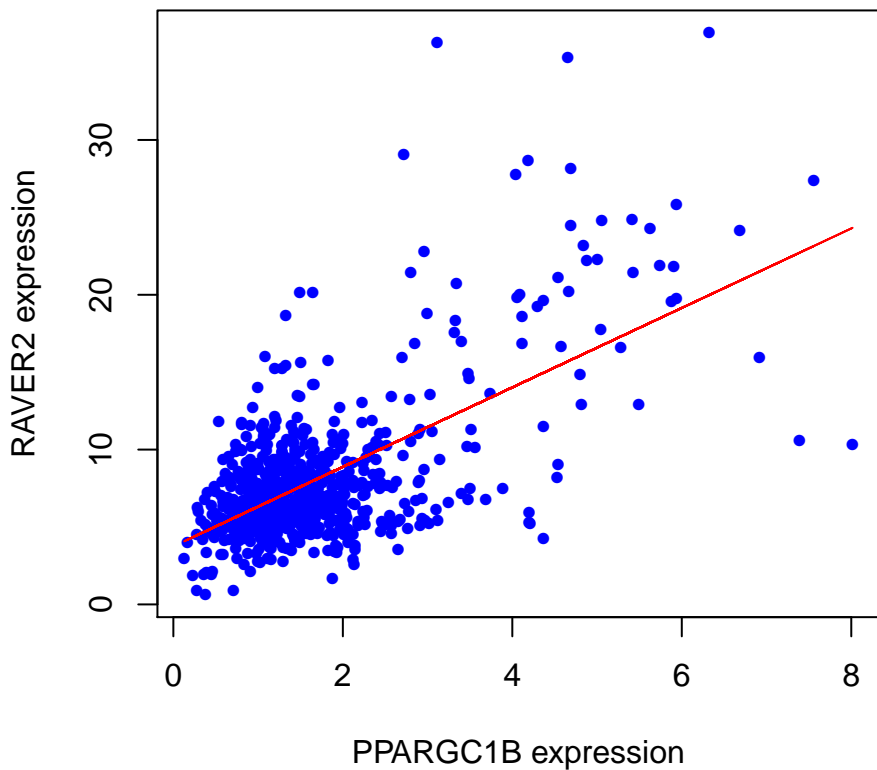

Supplement: raw_data.zip [file raw_data.zip]

**Cor=0.637 (p=5.873e-80)**

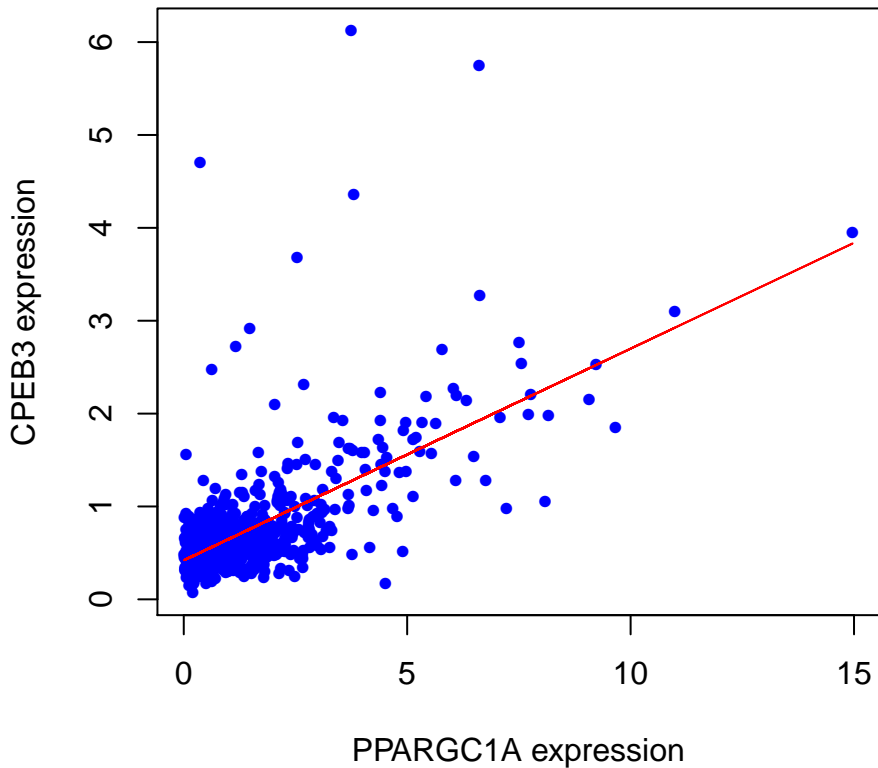

Supplement: raw_data.zip [file raw_data.zip]

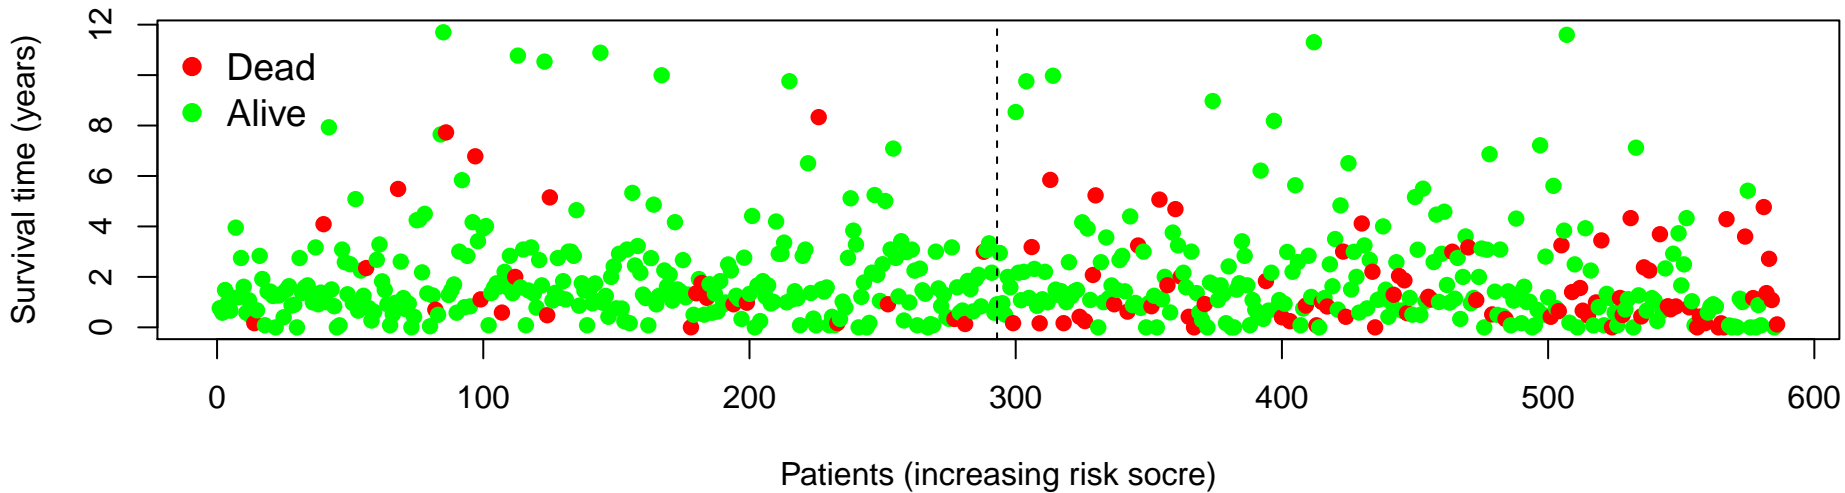

Supplement: raw_data.zip [file raw_data.zip]

|          | <b>pvalue</b> | <b>Hazard ratio</b> |
|----------|---------------|---------------------|
| PNLDC1   | 0.005         | 1.342(1.094–1.647)  |
| RRS1     | 0.004         | 1.622(1.171–2.247)  |
| HEXIM1   | 0.026         | 1.435(1.045–1.969)  |
| PPARGC1A | 0.128         | 0.839(0.669–1.052)  |
| PPARGC1B | 0.074         | 0.693(0.464–1.036)  |
| BRCA1    | 0.059         | 0.660(0.428–1.016)  |
| CELF4    | <0.001        | 1.726(1.307–2.280)  |
| AEN      | 0.002         | 1.549(1.169–2.052)  |
| NOVA1    | 0.121         | 1.178(0.958–1.449)  |

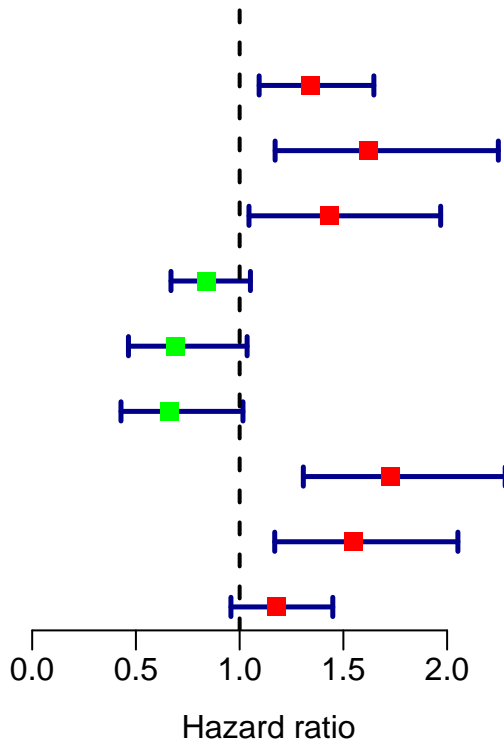

Supplement: raw_data.zip [file raw_data.zip]

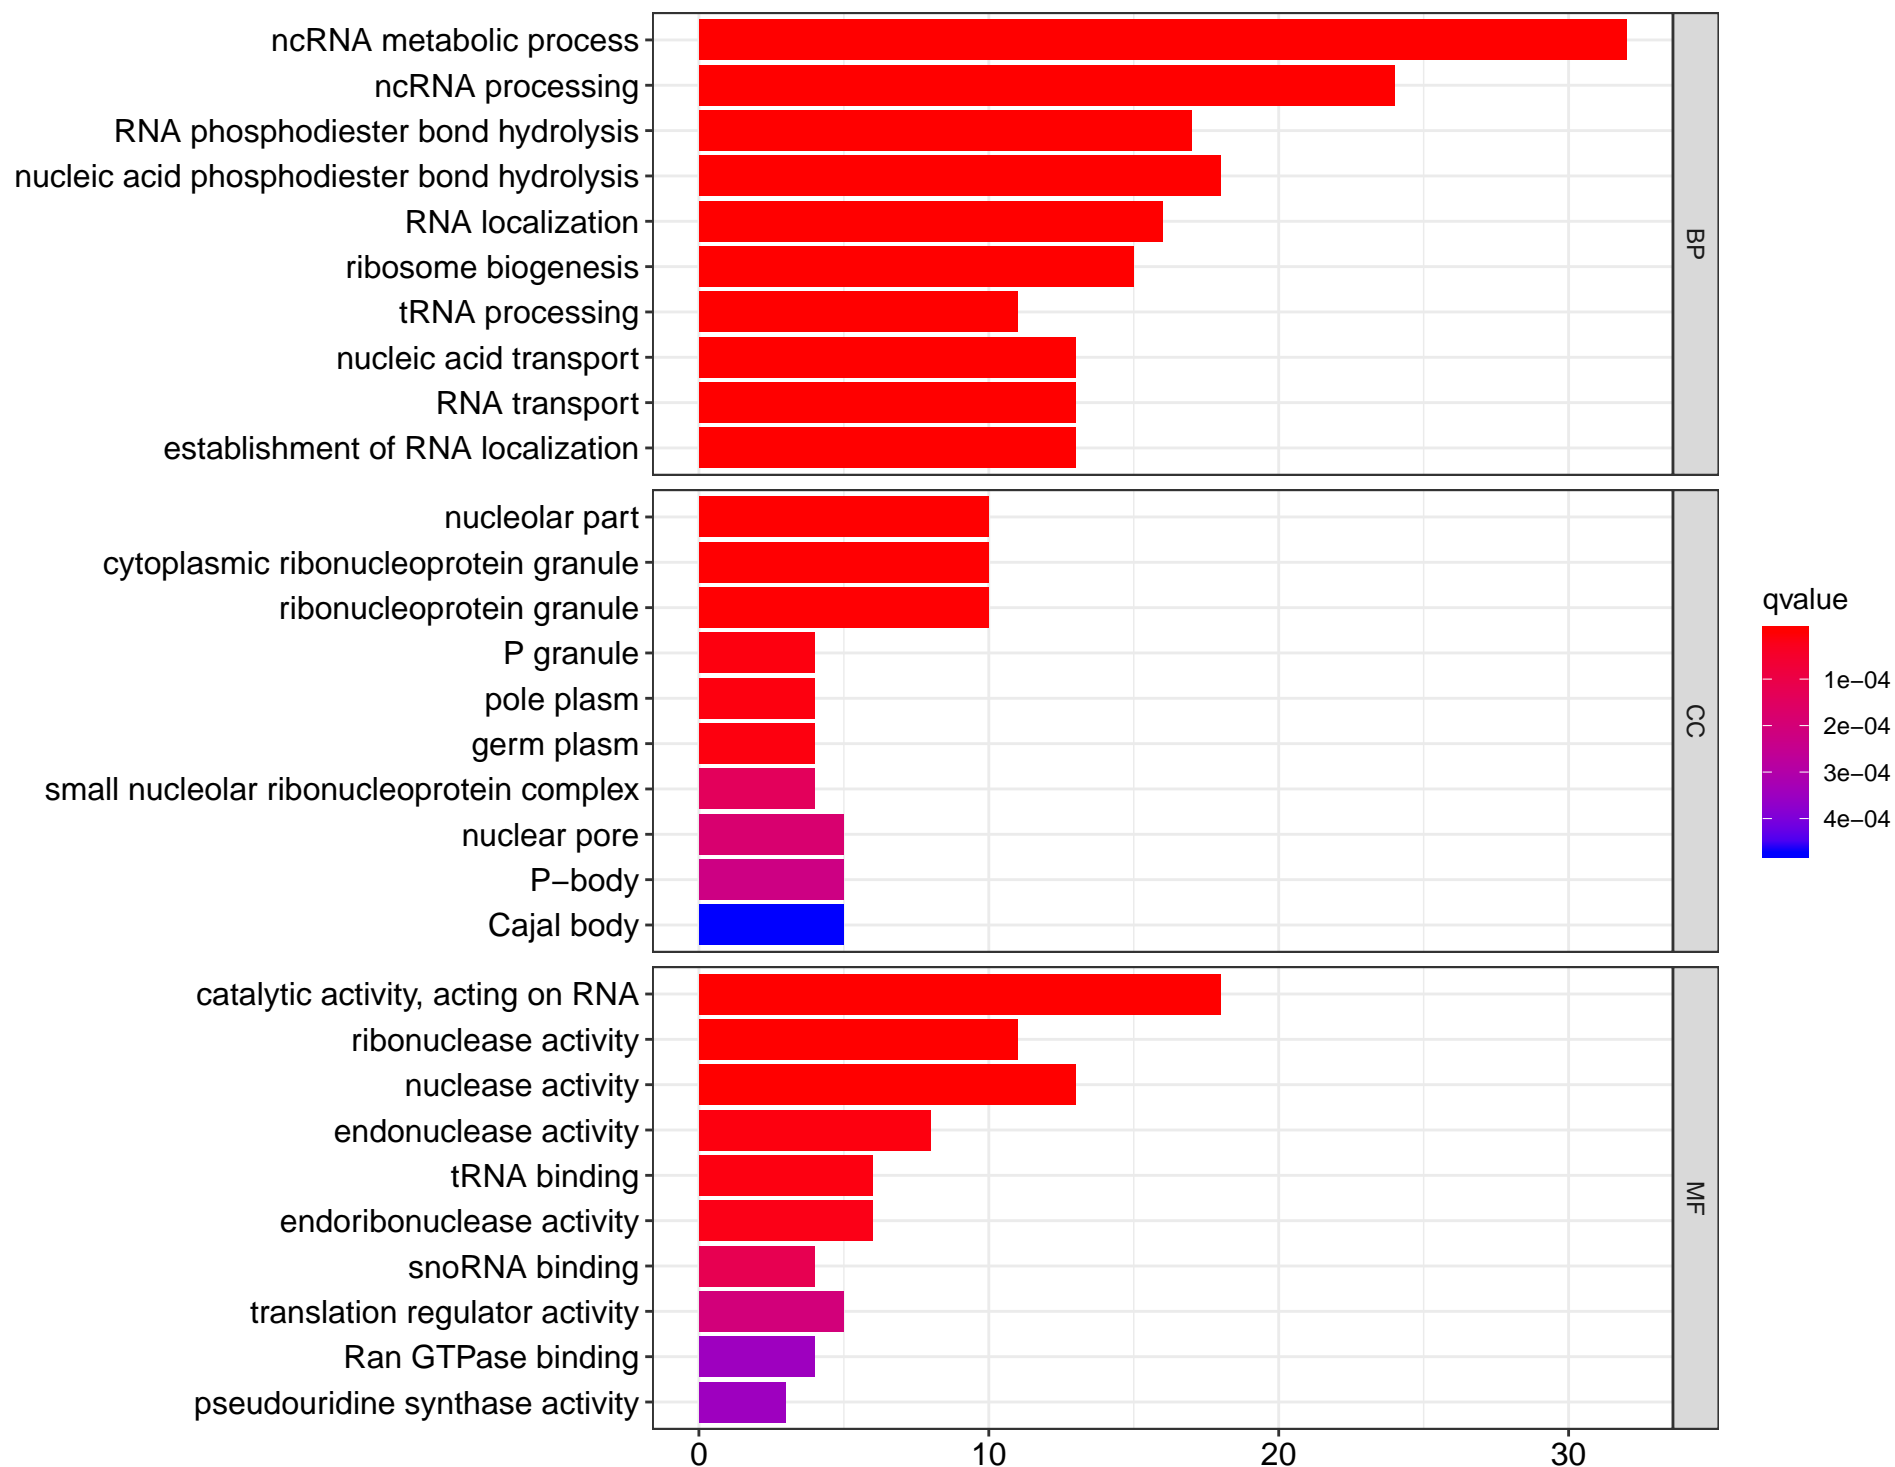

Supplement: raw_data.zip [file raw_data.zip]

**Cor=0.709 (p=1.229e-106)**

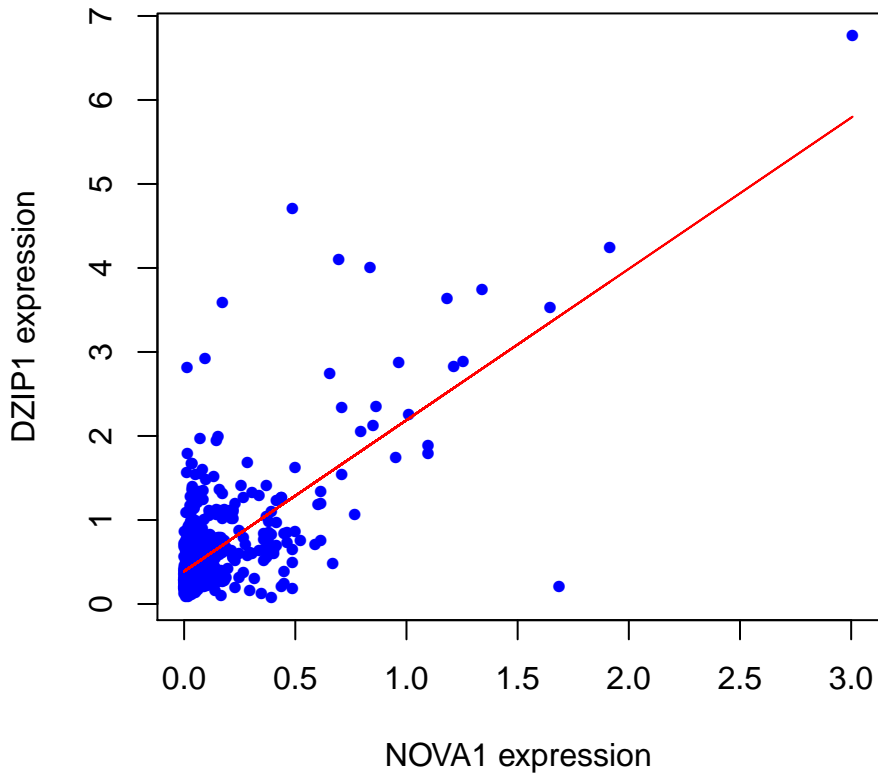

Supplement: raw_data.zip [file raw_data.zip]
